# Supplementary material for: Restoring South African subtropical succulent thicket using Portulacaria afra : exploring the rooting window hypothesis
Source: PeerJ journal article supplement (doi:10.7717/peerj.15538), 2023-07-24
Supplement: Raw_data_and_Scripts.zip [file Raw_data_and_Scripts.zip]

## Sheet: MetaData
Metadata
			General length
Title of data set:	An investigation of the rooting window hypothesis in Portulacaria afra: implications for large scale restoration initiatives.		Short
Data set Owner\s:	Alastair J. Potts (& Ryan E. Forbes?)		Short
Organisation:	Nelson Mandela University		Short
Student details
Contact person	Ryan Forbes		Short
Position	Student		Short
Phone	27744837718		Short
Email	s219090378@mandela.ac.za		Short
Homepage	N/A		Short
Address	Building 12, Botany department, South Campus NMU		Short
Supervisor details
Contact person	Alastair Potts		Short
Position	Senior Lecturer		Short
Phone	27824917275		Short
Email	Alastair.Potts@mandela.ac.za		Short
Homepage	https://www.pottsresearch.org.za/		Short
Address	Building 12, Botany Department, South Campus, NMU		Short
Spatial Coverage	Use Google Earth, if necessary.
Bounding coordinates: N	N/A		Short
Bounding Coordinates: S	N/A		Short
Bounding coordinates: W	N/A		Short
Bounding coordinates: E	N/A		Short
Description	The study was conducted in the Botany Department, of Building 12, on NMU's South Campus		Short
Temporal Coverage
Start Date			Short
End Date			Short
General Description			Short
Ethics clearance
Is ethics clearnance required? (If No, why not?)			Short
Ethics committee:			Short
Ethics permit No:			Short
Rights
Co-authorship required?			Short
Acknowledgement required?			Short
Commercial use acceptable?			Short
Citation			Short
IP Rights			Short
Short background			Medium
Aims, Objectives and/or Hypotheses			Medium
Methods	Be as detailed as possible. Provide references if needed
Experimental design	In order to grow cuttings in controlled conditions, a large window receiving high quantities of diffused sunlight was selected in the botany department of the NMU university. Seedling trays would be used to grow the cuttings in, where in which in each seedling tray, seven rows were used allowing for a space to occur between each row (in the form of an unused row), preventing specimens from shadin…		Long
Methods used to generate the data set (link these to columns in the Description and Units section below)			Long
Equipment used
Sampling Description - how were the samples collected			Medium
Quality Control (was any form of data verification / cleaning? If so briefly describe methods)			Medium
Sensitive data
Are there any records in the data set that represent sensitive data (e.g. populations threatened if the exact locality is made public)? Please explain which ones and the rationale for considering these as sensitive data. If included, please flag sensitive species records in the data sheet, and describe here how the records can be identified.			Short to medium
Spreadsheet and Column names	Description and units
Spreadsheet: WeatherConditions	General description of what this spreadsheet contains and an explanation of the name if necessary.
Column: Date	Full name of variable, plus the units, and - where applicable - the method used to generate the data. If the column contains categorical data (e.g. names of treatments), then please provide the categories used and explain them.
Column: Hour
Column: Temperature
Column: Precipitation
Column:
Column:
Column:
etc.
Spreadsheet:
Column:
Column:
Column:
Column:
Column:
Column:
Column:
etc.
Reference list:
Reference 1
Reference 2
Reference 3

## Sheet: Data
Tray	Column	Treatment	Row	Plant	StemWidth_mm	Height_mm	Cutting Symmetry	DegreeOfBranching	NoOfRootingPts	RootMass_g	StemDryMass_g	RootFraction	Rooted
1	1	D04	A	P1	5.92	220	Asymmetrical	High	21	0.135	3.301	0.0392899	1
1	1	D04	B	P5	7.05	225	Unknown	Medium	NA	0.101	3.548	0.0276788	1
1	1	D04	C	P2	5.53	212	Asymmetrical	Medium	NA	0.036	3.415	0.0104318	1
1	1	D04	D	P7	5.94	243	Unknown	Medium	7	0.011	2.758	0.00397255	1
1	1	D04	E	P6	5.93	229	Asymmetrical	Medium	NA	0.038	2.582	0.0145038	1
1	1	D04	F	P3	5.04	234	Unknown	Medium	6	0.006	2.324	0.00257511	1
1	1	D04	G	P4	6.56	216	Unknown	High	16	0.062	4.633	0.0132055	1
1	2	D28	A	P5	5.61	249	Symmetrical	High	NA	0.178	3.6	0.0471149	1
1	2	D28	B	P3	5.07	195	Unknown	High	17	0.031	1.494	0.0203279	1
1	2	D28	C	P6	6.26	246	Asymmetrical	Medium	0	0	3.363	0	0
1	2	D28	D	P4	5.24	214	Unknown	High	3	0.001	2.956	0.000338181	1
1	2	D28	E	P1	6.45	230	Unknown	Low	0	0	2.07	0	0
1	2	D28	F	P2	7.21	216	Asymmetrical	High	3	0.027	3.295	0.00812763	1
1	2	D28	G	P7	6.44	212	Unknown	Medium	0	0	3.64	0	0
1	3	D21	A	P3	6.83	195	Unknown	Medium	6	0.019	3.203	0.00589696	1
1	3	D21	B	P6	5.54	225	Unknown	Low	NA	0.025	2.831	0.0087535	1
1	3	D21	C	P7	5.19	244	Unknown	Low	6	0.031	3.323	0.0092427	1
1	3	D21	D	P4	5.99	270	Symmetrical	Low	7	0.03	3.424	0.00868558	1
1	3	D21	E	P5	5.55	247	Symmetrical	Low	10	0.143	2.736	0.04967	1
1	3	D21	F	P2	4.89	133	Unknown	High	0	0	1.127	0	0
1	3	D21	G	P1	6.34	253	Unknown	Low	0	0	2.913	0	0
1	4	D14	A	P1	5.85	238	Symmetrical	Low	3	0.007	1.475	0.00472335	1
1	4	D14	B	P3	4.3	242	Symmetrical	Medium	NA	0.011	2.639	0.00415094	1
1	4	D14	C	P5	5.79	280	Symmetrical	Low	13	0.108	2.474	0.041828	1
1	4	D14	D	P2	6.47	209	Asymmetrical	High	NA	0.011	2.629	0.00416667	1
1	4	D14	E	P6	6.69	224	Unknown	Medium	2	0.001	2.757	0.000362582	1
1	4	D14	F	P7	6.8	244	Asymmetrical	Low	0	0	2	0	0
1	4	D14	G	P4	5.14	232	Symmetrical	Low	9	0.13	1.696	0.0711939	1
1	5	D07	A	P1	5.73	231	Asymmetrical	High	16	0.094	3.926	0.0233831	1
1	5	D07	B	P3	5.7	212	Symmetrical	Medium	14	0.105	2.1	0.047619	1
1	5	D07	C	P4	4.75	197	Unknown	Medium	8	0.029	2.268	0.0126252	1
1	5	D07	D	P6	5.16	214	Unknown	Low	0	0	2.311	0	0
1	5	D07	E	P2	6.4	165	Symmetrical	Medium	5	0.003	1.692	0.00176991	1
1	5	D07	F	P5	5.53	233	Symmetrical	Low	13	0.038	1.712	0.0217143	1
1	5	D07	G	P7	6.13	239	Unknown	High	NA	0.025	2.364	0.0104646	1
1	6	D01	A	P5	5.57	240	Asymmetrical	High	39	0.108	2.516	0.0411585	1
1	6	D01	B	P6	4.63	208	Symmetrical	Low	9	0.037	1.379	0.0261299	1
1	6	D01	C	P3	6.04	225	Unknown	Medium	20	0.036	2.116	0.0167286	1
1	6	D01	D	P4	5.93	223	Symmetrical	Low	10	0.017	1.744	0.00965361	1
1	6	D01	E	P2	4.34	183	Asymmetrical	Low	6	0.016	1.246	0.0126783	1
1	6	D01	F	P1	5.17	199	Symmetrical	Low	NA	0.01	1.612	0.00616523	1
1	6	D01	G	P7	6.36	206	Symmetrical	Low	5	0.024	2.073	0.0114449	1
1	7	C	A	P7	6.73	191	Symmetrical	Low	0	0	2.822	0	0
1	7	C	B	P6	5.44	242	Asymmetrical	Low	0	0	2.104	0	0
1	7	C	C	P5	5.11	270	Asymmetrical	Medium	0	0	2.851	0	0
1	7	C	D	P3	4.99	229	Unknown	Low	0	0	1.61	0	0
1	7	C	E	P2	5.87	204	Symmetrical	Low	0	0	2.582	0	0
1	7	C	F	P1	6.93	240	NA	NA	0	0	2.445	0	0
1	7	C	G	P4	6.36	280	NA	NA	0	0	2.809	0	0
2	1	D01	A	P2	4.58	160	Unknown	Low	NA	0.006	0.669	0.00888889	1
2	1	D01	B	P5	6.87	285	Unknown	Low	35	0.22	3.412	0.0605727	1
2	1	D01	C	P7	5.97	215	Symmetrical	Low	8	0.039	2.384	0.0160957	1
2	1	D01	D	P3	6.67	221	Symmetrical	High	40	0.094	3.19	0.0286236	1
2	1	D01	E	P6	5.88	207	Unknown	Low	0	0	2.089	0	0
2	1	D01	F	P4	6.43	249	Unknown	Low	25	0.063	1.98	0.030837	1
2	1	D01	G	P1	5.34	260	Unknown	Low	0	0	2.376	0	0
2	2	D04	A	P5	5.06	230	Unknown	Medium	45	0.075	2.554	0.028528	1
2	2	D04	B	P3	5.18	234	Asymmetrical	Low	18	0.031	1.812	0.0168204	1
2	2	D04	C	P7	5.32	223	Symmetrical	Low	NA	0.015	2.104	0.00707881	1
2	2	D04	D	P2	6.46	201	Asymmetrical	High	0	0	3.366	0	0
2	2	D04	E	P4	5.77	190	Unknown	Medium	14	0.062	2.973	0.0204283	1
2	2	D04	F	P6	7.13	237	Unknown	High	7	0.024	3.176	0.0075	1
2	2	D04	G	P1	4.83	238	Symmetrical	Low	17	0.037	1.371	0.0262784	1
2	3	D28	A	P3	5.61	257	Unknown	Medium	0	0	2.744	0	0
2	3	D28	B	P5	5.7	280	Symmetrical	Medium	12	0.113	2.244	0.0479423	1
2	3	D28	C	P4	6.19	263	Symmetrical	Low	9	0.05	2.827	0.0173792	1
2	3	D28	D	P1	6.51	221	Unknown	Low	0	0	2.083	0	0
2	3	D28	E	P6	5.44	201	Unknown	Low	4	0.02	3.046	0.00652316	1
2	3	D28	F	P2	3.68	170	Unknown	Low	0	0	0.749	0	0
2	3	D28	G	P7	5.31	222	Symmetrical	Low	0	0	1.372	0	0
2	4	D07	A	P4	4.86	224	Unknown	Medium	33	0.098	2.032	0.0460094	1
2	4	D07	B	P5	6.14	225	Asymmetrical	High	31	0.164	3.087	0.050446	1
2	4	D07	C	P7	6.44	281	Asymmetrical	Low	0	0	2.884	0	0
2	4	D07	D	P6	6.13	242	Symmetrical	Low	0	0	2.234	0	0
2	4	D07	E	P1	6.39	233	Symmetrical	Low	7	0.07	2.881	0.0237208	1
2	4	D07	F	P2	5.82	184	Asymmetrical	Low	0	0	1.554	0	0
2	4	D07	G	P3	4.98	252	Symmetrical	Low	0	0	2.003	0	0
2	5	C	A	P5	7.43	220	NA	NA	5	0.001	4.331	0.00023084	1
2	5	C	B	P2	6.04	209	NA	NA	0	0	1.964	0	0
2	5	C	C	P4	7.09	210	NA	NA	0	0	4.153	0	0
2	5	C	D	P6	7.04	239	NA	NA	0	0	2.59	0	0
2	5	C	E	P7	6.07	234	NA	NA	0	0	2.319	0	0
2	5	C	F	P3	6.9	240	NA	NA	0	0	2.459	0	0
2	5	C	G	P1	5.18	224	NA	NA	0	0	1.905	0	0
2	6	D21	A	P1	4.1	230	Symmetrical	Low	0	0	1.643	0	0
2	6	D21	B	P6	5.13	216	Symmetrical	Low	1	0.021	2.225	0.00934996	1
2	6	D21	C	P3	4.57	191	Symmetrical	Low	3	0.007	1.376	0.00506146	1
2	6	D21	D	P7	6.16	217	Symmetrical	Low	0	0	2.482	0	0
2	6	D21	E	P5	5.12	262	Unknown	Medium	18	0.143	2.387	0.0565217	1
2	6	D21	F	P2	5.86	223	Asymmetrical	Medium	2	0.003	2.463	0.00121655	1
2	6	D21	G	P4	5.75	233	Asymmetrical	Medium	0	0	2.564	0	0
2	7	D14	A	P4	6.01	245	Symmetrical	Low	5	0.012	2.921	0.00409137	1
2	7	D14	B	P7	5.21	253	Symmetrical	Low	4	0.022	2.021	0.0107685	1
2	7	D14	C	P2	5.47	180	Asymmetrical	Medium	3	0.018	1.58	0.0112641	1
2	7	D14	D	P5	7.18	211	Symmetrical	High	18	0.135	3.85	0.033877	1
2	7	D14	E	P3	4.66	199	Symmetrical	Medium	15	0.138	2.958	0.0445736	1
2	7	D14	F	P6	6.91	218	Asymmetrical	Low	0	0	2.586	0	0
2	7	D14	G	P1	6.71	231	Unknown	Low	0	0	3.824	0	0
3	1	D14	A	P5	6.51	271	Unknown	Medium	23	0.169	2.445	0.0646519	1
3	1	D14	B	P4	7.18	190	Unknown	High	0	0	3.224	0	0
3	1	D14	C	P7	6.38	231	Unknown	Low	3	0.023	1.924	0.011813	1
3	1	D14	D	P1	6.47	229	Unknown	Low	1	0.001	1.937	0.000515996	1
3	1	D14	E	P6	5.24	204	Asymmetrical	Medium	33	0.1	2.645	0.0364299	1
3	1	D14	F	P2	5.79	201	Unknown	High	0	0	2.955	0	0
3	1	D14	G	P3	4.2	232	Symmetrical	Medium	20	0.1	1.588	0.0592417	1
3	2	D28	A	P7	6.71	224	Asymmetrical	Medium	6	0.022	2.613	0.00834915	1
3	2	D28	B	P1	5.32	241	Symmetrical	Low	1	0.004	3.266	0.00122324	1
3	2	D28	C	P5	5.22	260	Symmetrical	Low	27	0.216	2.979	0.0676056	1
3	2	D28	D	P2	7.65	192	Asymmetrical	Medium	0	0	3.33	0	0
3	2	D28	E	P3	5.24	227	Unknown	Low	13	0.097	2.504	0.0372933	1
3	2	D28	F	P6	6.24	222	Unknown	High	0	0	3.452	0	0
3	2	D28	G	P4	6.27	221	Unknown	Low	19	0.199	3.679	0.0513151	1
3	3	C	A	P3	5.77	242	Unknown	Medium	0	0	2.456	0	0
3	3	C	B	P7	5.32	254	Symmetrical	Low	0	0	2	0	0
3	3	C	C	P2	5.74	202	Asymmetrical	Medium	0	0	1.553	0	0
3	3	C	D	P1	5.82	248	Asymmetrical	Medium	0	0	3.081	0	0
3	3	C	E	P6	5.5	232	Unknown	Low	0	0	2.327	0	0
3	3	C	F	P5	5.71	243	NA	NA	0	0	2.595	0	0
3	3	C	G	P4	4.65	200	Symmetrical	Low	0	0	1.373	0	0
3	4	D01	A	P7	7.34	245	Unknown	Medium	13	0.086	6.67	0.0127294	1
3	4	D01	B	P1	5.77	265	Symmetrical	Low	10	0.047	2.294	0.0200769	1
3	4	D01	C	P4	5.46	250	Symmetrical	Low	11	0.037	2.206	0.0164958	1
3	4	D01	D	P6	6.97	233	Symmetrical	Low	3	0.003	2.774	0.0010803	1
3	4	D01	E	P5	6.27	247	Unknown	Low	7	0.032	3.395	0.00933761	1
3	4	D01	F	P2	6.83	221	Unknown	High	0	0	2.255	0	0
3	4	D01	G	P3	6	240	Unknown	High	18	0.063	2.923	0.0210985	1
3	5	D04	A	P7	6.18	250	Unknown	Medium	NA	0.083	3.454	0.0234662	1
3	5	D04	B	P1	6.12	229	Unknown	Low	10	0.029	2.482	0.0115492	1
3	5	D04	C	P6	6.99	258	Asymmetrical	High	4	0.008	5.872	0.00136054	1
3	5	D04	D	P2	5.98	200	Asymmetrical	Medium	1	0.009	1.57	0.00569981	1
3	5	D04	E	P3	4.88	227	Unknown	Medium	1	0.002	1.582	0.00126263	1
3	5	D04	F	P4	5.56	269	Asymmetrical	Medium	10	0.041	3.056	0.0132386	1
3	5	D04	G	P5	5.67	250	Symmetrical	Medium	29	0.058	3.263	0.0174646	1
3	6	D21	A	P6	5.63	221	Unknown	Medium	0	0	1.932	0	0
3	6	D21	B	P3	3.88	223	Symmetrical	Low	19	0.21	1.839	0.102489	1
3	6	D21	C	P7	6.54	277	Asymmetrical	Medium	0	0	3.847	0	0
3	6	D21	D	P4	5.58	222	Unknown	Low	NA	0.124	2.175	0.0539365	1
3	6	D21	E	P5	4.64	267	Symmetrical	Low	9	0.089	2.243	0.0381647	1
3	6	D21	F	P1	5.21	220	Unknown	Low	0	0	1.613	0	0
3	6	D21	G	P2	4.89	160	Unknown	Low	0	0	0.884	0	0
3	7	D07	A	P1	5.56	227	Unknown	Low	3	0.015	1.842	0.00807754	1
3	7	D07	B	P7	5.81	277	Symmetrical	Low	15	0.04	2.664	0.0147929	1
3	7	D07	C	P5	4.51	249	Unknown	Low	43	0.124	2.032	0.0575139	1
3	7	D07	D	P4	6.08	186	Unknown	Medium	7	0.055	2.864	0.0188421	1
3	7	D07	E	P3	5.34	237	Symmetrical	Low	17	0.059	2.124	0.027027	1
3	7	D07	F	P2	4.54	238	Asymmetrical	Low	4	0.012	0.975	0.0121581	1
3	7	D07	G	P6	5.07	224	Symmetrical	Low	0	0	1.616	0	0
4	1	D28	A	P5	5.31	256	Asymmetrical	Medium	NA	0.051	3.163	0.0158681	1
4	1	D28	B	P4	6.74	211	Symmetrical	Low	NA	0.031	3.132	0.00980082	1
4	1	D28	C	P7	5.34	183	Unknown	Low	NA	0.084	2.163	0.0373832	1
4	1	D28	D	P6	6.64	221	Unknown	Medium	NA	0.017	3.578	0.00472879	1
4	1	D28	E	P1	6.78	218	Unknown	Low	0	0	2.139	0	0
4	1	D28	F	P2	4.74	198	Unknown	Low	0	0	1.347	0	0
4	1	D28	G	P3	6.23	212	Symmetrical	High	NA	0.309	4.919	0.0591048	1
4	2	D07	A	P6	5.9	218	Symmetrical	Low	NA	0.108	1.761	0.0577849	1
4	2	D07	B	P3	5.43	252	Unknown	Low	12	0.08	1.85	0.0414508	1
4	2	D07	C	P5	5.3	257	Symmetrical	Low	5	0.079	2.448	0.0312624	1
4	2	D07	D	P1	5.03	234	Unknown	Low	10	0.07	1.961	0.0344658	1
4	2	D07	E	P7	5.61	241	Symmetrical	Low	0	0	2.532	0	0
4	2	D07	F	P2	5.34	225	Asymmetrical	Low	4	0.011	1.132	0.0096238	1
4	2	D07	G	P4	5.65	174	Unknown	High	0	0	2.684	0	0
4	3	C	A	P6	5.61	233	NA	NA	0	0	1.892	0	0
4	3	C	B	P1	7.16	213	NA	NA	0	0	3.819	0	0
4	3	C	C	P5	5.76	260	NA	NA	0	0	2.103	0	0
4	3	C	D	P7	6.01	243	NA	NA	0	0	1.909	0	0
4	3	C	E	P4	6.25	233	NA	NA	0	0	2.161	0	0
4	3	C	F	P2	6.44	199	NA	NA	0	0	1.133	0	0
4	3	C	G	P3	5.54	190	NA	NA	0	0	2.154	0	0
4	4	D01	A	P6	5.78	224	Symmetrical	Low	3	0.013	2.502	0.00516899	1
4	4	D01	B	P5	4.87	226	Symmetrical	Low	NA	0.023	1.433	0.0157967	1
4	4	D01	C	P7	6.9	232	Asymmetrical	High	19	0.049	4.249	0.0114007	1
4	4	D01	D	P4	7.17	198	Asymmetrical	High	NA	0.045	5.296	0.00842539	1
4	4	D01	E	P2	5.54	183	Unknown	High	NA	0.008	1.982	0.0040201	1
4	4	D01	F	P3	4.99	218	Unknown	High	NA	0.007	2.281	0.00305944	1
4	4	D01	G	P1	7.66	214	Asymmetrical	High	NA	0.044	3.722	0.0116835	1
4	5	D14	A	P4	4.84	208	Symmetrical	Low	NA	0.05	1.496	0.0323415	1
4	5	D14	B	P2	4.86	217	Asymmetrical	High	1	0.004	1.863	0.00214247	1
4	5	D14	C	P7	5.69	269	Unknown	Low	0	0	1.636	0	0
4	5	D14	D	P1	5.15	209	Asymmetrical	Medium	NA	0.03	3.134	0.00948167	1
4	5	D14	E	P3	5.07	253	Unknown	High	19	0.237	2.808	0.0778325	1
4	5	D14	F	P5	4.82	251	Symmetrical	High	NA	0.151	1.104	0.120319	1
4	5	D14	G	P6	6.03	199	Asymmetrical	High	0	0	3.195	0	0
4	6	D21	A	P1	5.13	217	Asymmetrical	Low	0	0	1.353	0	0
4	6	D21	B	P4	5.32	186	Asymmetrical	Low	NA	0.073	1.69	0.0414067	1
4	6	D21	C	P2	4.66	170	Unknown	Low	4	0.016	1.741	0.00910643	1
4	6	D21	D	P5	5.86	257	Symmetrical	Low	10	0.214	3.296	0.0609687	1
4	6	D21	E	P6	5.06	204	Asymmetrical	Low	NA	0.025	1.991	0.0124008	1
4	6	D21	F	P7	6.63	195	Unknown	Medium	NA	0.017	2.531	0.0066719	1
4	6	D21	G	P3	4.73	213	Symmetrical	Low	NA	0.083	1.82	0.0436153	1
4	7	D04	A	P1	7.54	236	Unknown	High	NA	0.011	3.284	0.00333839	1
4	7	D04	B	P4	6.28	238	Symmetrical	Low	15	0.042	2.949	0.0140421	1
4	7	D04	C	P2	5.71	231	Unknown	Low	NA	0.02	1.913	0.0103466	1
4	7	D04	D	P6	5.65	210	Asymmetrical	High	11	0.026	3.45	0.00747986	1
4	7	D04	E	P7	5.78	280	Symmetrical	Low	4	0.009	3.601	0.00249307	1
4	7	D04	F	P5	4.51	253	Unknown	Low	10	0.031	1.6	0.0190067	1
4	7	D04	G	P3	5.62	230	Symmetrical	Medium	10	0.057	3.383	0.0165698	1
5	1	D21	A	P5	5.46	246	Unknown	Medium	11	0.076	3.47	0.0214326	1
5	1	D21	B	P6	5.24	208	Unknown	Medium	1	0.001	2.235	0.000447227	1
5	1	D21	C	P2	5.32	225	Asymmetrical	Medium	0	0	2.425	0	0
5	1	D21	D	P1	5.39	223	Symmetrical	Low	0	0	1.925	0	0
5	1	D21	E	P7	6.87	201	Unknown	Medium	2	0.001	2.351	0.00042517	1
5	1	D21	F	P4	6.61	234	Symmetrical	Low	5	0.047	2.071	0.0221907	1
5	1	D21	G	P3	4.29	215	Asymmetrical	Medium	1	0.002	1.713	0.00116618	1
5	2	D01	A	P6	7.13	220	Unknown	High	5	0.025	4.56	0.00545256	1
5	2	D01	B	P4	5.63	209	Unknown	Low	20	0.072	1.764	0.0392157	1
5	2	D01	C	P7	7.49	210	Unknown	High	24	0.109	3.108	0.0338825	1
5	2	D01	D	P1	5.73	234	Unknown	Medium	24	0.08	2.946	0.0264375	1
5	2	D01	E	P3	6.54	251	Symmetrical	High	31	0.065	2.529	0.0250578	1
5	2	D01	F	P2	4.03	200	Asymmetrical	Low	2	0.004	0.785	0.00506971	1
5	2	D01	G	P5	5.41	238	Symmetrical	Medium	NA	0.089	2.499	0.0343895	1
5	3	D07	A	P7	6.83	280	Symmetrical	Low	9	0.056	5.068	0.010929	1
5	3	D07	B	P1	5.44	208	Asymmetrical	Medium	17	0.093	2.472	0.0362573	1
5	3	D07	C	P2	5.01	195	Unknown	Low	7	0.019	1.402	0.0133709	1
5	3	D07	D	P3	5.81	237	Unknown	Medium	NA	0.056	2.274	0.0240343	1
5	3	D07	E	P5	4.67	210	Symmetrical	Medium	35	0.073	1.632	0.0428152	1
5	3	D07	F	P6	6.27	206	Unknown	Medium	1	0.001	2.595	0.000385208	1
5	3	D07	G	P4	5.93	205	Unknown	Medium	1	0.009	2.929	0.00306331	1
5	4	C	A	P5	5.52	227	NA	NA	0	0	2.476	0	0
5	4	C	B	P3	5.12	247	NA	NA	0	0	1.791	0	0
5	4	C	C	P7	6.13	202	NA	NA	0	0	3.076	0	0
5	4	C	D	P2	5.42	243	NA	NA	0	0	2.32	0	0
5	4	C	E	P6	6.05	239	NA	NA	0	0	2.973	0	0
5	4	C	F	P1	5.94	254	NA	NA	0	0	2.686	0	0
5	4	C	G	P4	6.47	270	NA	NA	0	0	3.334	0	0
5	5	D04	A	P1	6.45	247	Symmetrical	Medium	8	0.023	3.851	0.00593702	1
5	5	D04	B	P6	4.75	201	Asymmetrical	High	23	0.051	1.873	0.0265073	1
5	5	D04	C	P5	5.45	256	Unknown	High	27	0.165	3.402	0.0462574	1
5	5	D04	D	P2	5.16	209	Symmetrical	Low	10	0.039	1.728	0.0220713	1
5	5	D04	E	P3	4.75	230	Unknown	Low	14	0.109	1.529	0.0665446	1
5	5	D04	F	P4	5.86	185	Asymmetrical	Medium	6	0.06	2.075	0.028103	1
5	5	D04	G	P7	6.19	255	Symmetrical	Low	7	0.027	2.126	0.0125406	1
5	6	D28	A	P7	7.01	202	Asymmetrical	Medium	5	0.004	3.058	0.00130634	1
5	6	D28	B	P4	6.59	243	Symmetrical	Low	0	0	2.963	0	0
5	6	D28	C	P3	5.66	238	Unknown	High	9	0.078	2.31	0.0326633	1
5	6	D28	D	P6	6.59	228	Asymmetrical	Medium	8	0.015	3.254	0.00458856	1
5	6	D28	E	P2	5.82	235	Asymmetrical	High	0	0	2.284	0	0
5	6	D28	F	P1	7.46	219	Symmetrical	Low	6	0.024	3.559	0.0066983	1
5	6	D28	G	P5	6.04	188	Unknown	High	7	0.066	3.508	0.0184667	1
5	7	D14	A	P6	5.43	218	Symmetrical	Low	1	0.003	3.508	0.000854457	1
5	7	D14	B	P5	6.28	201	Unknown	High	19	0.106	2.67	0.0381844	1
5	7	D14	C	P2	5.89	257	Unknown	Medium	12	0.079	3.153	0.0244431	1
5	7	D14	D	P3	4.78	268	Unknown	Medium	0	0	1.902	0	0
5	7	D14	E	P7	6.78	173	Asymmetrical	High	16	0.155	2.95	0.0499195	1
5	7	D14	F	P1	5.54	245	Asymmetrical	High	NA	0.169	5.107	0.0320318	1
5	7	D14	G	P4	7.85	165	Unknown	Medium	17	0.153	2.992	0.0486486	1
6	1	D21	A	P2	4.88	200	Unknown	Low	3	0.01	2.391	0.00416493	1
6	1	D21	B	P5	4.95	230	Asymmetrical	Medium	14	0.109	2.086	0.0496583	1
6	1	D21	C	P7	5.45	193	Unknown	High	11	0.075	2.939	0.0248839	1
6	1	D21	D	P4	4.9	205	Unknown	High	8	0.096	3.24	0.028777	1
6	1	D21	E	P3	4.41	202	Asymmetrical	Low	0	0	0.958	0	0
6	1	D21	F	P6	6.72	237	Asymmetrical	High	14	0.247	3.406	0.0676157	1
6	1	D21	G	P1	6.43	240	Symmetrical	Low	0	0	2.585	0	0
6	2	D14	A	P4	5.52	234	Symmetrical	Low	20	0.138	2.57	0.0509601	1
6	2	D14	B	P1	6.29	201	Asymmetrical	Medium	0	0	3.433	0	0
6	2	D14	C	P7	6.12	220	Symmetrical	Low	3	0.008	1.388	0.00573066	1
6	2	D14	D	P6	5.6	231	Unknown	Medium	0	0	2.971	0	0
6	2	D14	E	P3	5.74	268	Symmetrical	Low	12	0.034	2.813	0.0119424	1
6	2	D14	F	P2	5.37	233	Unknown	Low	NA	0.017	2.24	0.00753212	1
6	2	D14	G	P5	4.72	226	Asymmetrical	Medium	19	0.103	2.522	0.0392381	1
6	3	D04	A	P2	4.52	181	Asymmetrical	Low	11	0.03	2.257	0.0131176	1
6	3	D04	B	P5	5.46	269	Unknown	Medium	23	0.031	3.212	0.00955905	1
6	3	D04	C	P6	4.61	213	Unknown	Medium	14	0.023	2.056	0.011063	1
6	3	D04	D	P4	5.74	228	Symmetrical	Low	24	0.113	2.556	0.042338	1
6	3	D04	E	P3	4.97	212	Symmetrical	Medium	5	0.006	2.443	0.00244998	1
6	3	D04	F	P1	7.43	270	Unknown	Medium	1	0.002	3.324	0.000601323	1
6	3	D04	G	P7	5.52	213	Unknown	Medium	5	0.011	2.235	0.0048976	1
6	4	D01	A	P7	5.65	206	Unknown	Medium	17	0.055	2.355	0.0228216	1
6	4	D01	B	P4	5.36	230	Symmetrical	Low	12	0.025	1.649	0.0149343	1
6	4	D01	C	P5	5.7	243	Unknown	Medium	16	0.035	3.365	0.0102941	1
6	4	D01	D	P1	7.34	210	Asymmetrical	Low	27	0.062	1.721	0.0347729	1
6	4	D01	E	P6	4.72	223	Unknown	Low	8	0.026	1.921	0.0133539	1
6	4	D01	F	P2	6.71	221	Unknown	Low	3	0.001	1.804	0.000554017	1
6	4	D01	G	P3	4.73	215	Unknown	Medium	22	0.07	1.602	0.041866	1
6	5	D28	A	P2	4.23	190	Asymmetrical	Low	5	0.026	1.686	0.0151869	1
6	5	D28	B	P3	5.42	265	Unknown	Medium	3	0.008	3.13	0.00254939	1
6	5	D28	C	P6	5.78	213	Asymmetrical	Medium	12	0.11	4.31	0.0248869	1
6	5	D28	D	P4	5.6	220	Unknown	Low	2	0.005	2.478	0.00201369	1
6	5	D28	E	P1	5.22	230	Unknown	Low	0	0	1.631	0	0
6	5	D28	F	P5	5.23	241	Symmetrical	Medium	14	0.125	4.245	0.0286041	1
6	5	D28	G	P7	6.76	209	Symmetrical	High	0	0	3.257	0	0
6	6	C	A	P6	7.14	200	Unknown	High	0	0	4.017	0	0
6	6	C	B	P1	5.72	190	NA	NA	0	0	1.885	0	0
6	6	C	C	P4	5.32	251	Asymmetrical	Low	0	0	2.252	0	0
6	6	C	D	P3	4.86	200	Symmetrical	Low	0	0	1.304	0	0
6	6	C	E	P7	5.88	207	Asymmetrical	Medium	2	0	3.433	0	0
6	6	C	F	P2	5.84	196	Symmetrical	Low	0	0	1.323	0	0
6	6	C	G	P5	5.26	238	Symmetrical	Low	0	0	2.408	0	0
6	7	D07	A	P6	5.32	171	Asymmetrical	Low	7	0.072	2.004	0.0346821	1
6	7	D07	B	P2	6.65	210	Unknown	Low	5	0.017	2.37	0.00712191	1
6	7	D07	C	P4	5.63	253	Asymmetrical	Medium	9	0.09	3.665	0.023968	1
6	7	D07	D	P3	4.96	223	Symmetrical	Low	10	0.002	1.904	0.00104932	1
6	7	D07	E	P1	6.12	260	Unknown	Low	9	0.091	3.272	0.0270592	1
6	7	D07	F	P5	5.02	247	Unknown	Low	17	0.048	1.956	0.0239521	1
6	7	D07	G	P7	5.99	202	Symmetrical	Medium	3	0.044	2.97	0.0145985	1
7	1	C	A	P5	5.9	280	NA	NA	0	0	2.837	0	0
7	1	C	B	P7	6	268	NA	NA	0	0	2.801	0	0
7	1	C	C	P6	3.25	241	NA	NA	0	0	2.96	0	0
7	1	C	D	P3	5.87	212	NA	NA	0	0	2.193	0	0
7	1	C	E	P1	4.68	220	NA	NA	0	0	1.566	0	0
7	1	C	F	P4	6.69	173	NA	NA	0	0	3.416	0	0
7	1	C	G	P2	4.76	220	NA	NA	0	0	1.541	0	0
7	2	D28	A	P7	4.59	200	Asymmetrical	Low	2	0.001	2.398	0.00041684	1
7	2	D28	B	P6	4.76	188	Unknown	Low	0	0	1.355	0	0
7	2	D28	C	P2	5.61	180	Unknown	Low	5		1.235	0	0
7	2	D28	D	P1	6.14	213	Unknown	Low	2	0.008	2.717	0.00293578	1
7	2	D28	E	P5	5.63	275	Asymmetrical	Medium	4	0.009	2.527	0.0035489	1
7	2	D28	F	P4	6	222	Unknown	Low	0	0	2.822	0	0
7	2	D28	G	P3	4.38	179	Unknown	High	5	0.024	2.336	0.0101695	1
7	3	D04	A	P3	4.75	213	Asymmetrical	Medium	0	0	1.254	0	0
7	3	D04	B	P2	5.81	235	Unknown	Low	5	0.025	1.526	0.0161186	1
7	3	D04	C	P7	7.95	178	Symmetrical	High	11	0.079	3.617	0.0213745	1
7	3	D04	D	P4	5.32	240	Asymmetrical	Medium	7	0.014	3.55	0.00392817	1
7	3	D04	E	P1	6.12	271	Asymmetrical	Medium	4	0.029	4.573	0.00630161	1
7	3	D04	F	P5	6.02	213	Symmetrical	Medium	10	0.032	1.853	0.0169761	1
7	3	D04	G	P6	4.51	220	Asymmetrical	Medium	8	0.026	1.515	0.0168722	1
7	4	D21	A	P7	3.99	228	Asymmetrical	Low	0	0	1.766	0	0
7	4	D21	B	P6	6.27	202	Asymmetrical	High	22	0.139	3.797	0.035315	1
7	4	D21	C	P4	5.84	220	Symmetrical	Low	15	0.294	3.423	0.079096	1
7	4	D21	D	P5	3.8	191	Symmetrical	Medium	14	0.102	1.964	0.0493708	1
7	4	D21	E	P2	5.65	167	Unknown	Medium	3	0.003	1.752	0.0017094	1
7	4	D21	F	P1	4.81	238	Unknown	Low	19	0.099	2.661	0.0358696	1
7	4	D21	G	P3	4.49	209	Unknown	Low	7	0.039	1.884	0.0202808	1
7	5	D01	A	P7	5.42	211	Unknown	Low	13	0.043	2.121	0.0198706	1
7	5	D01	B	P4	4.82	235	Symmetrical	Low	7	0.027	1.535	0.0172855	1
7	5	D01	C	P1	5	241	Symmetrical	Low	9	0.046	1.866	0.0240586	1
7	5	D01	D	P6	5.97	230	Asymmetrical	High	0	0	2.008	0	0
7	5	D01	E	P2	4.39	180	Symmetrical	Low	6	0.019	0.833	0.0223005	1
7	5	D01	F	P3	4.9	202	Symmetrical	Medium	16	0.048	1.558	0.0298879	1
7	5	D01	G	P5	5.34	253	Symmetrical	Low	24	0.113	1.924	0.0554737	1
7	6	D14	A	P2	5.34	240	Asymmetrical	Medium	1	0.001	1.422	0.000702741	1
7	6	D14	B	P6	5.82	240	Asymmetrical	High	NA	0.001	2.521	0.000396511	1
7	6	D14	C	P5	6.41	270	Asymmetrical	Medium	17	0.155	2.867	0.0512905	1
7	6	D14	D	P3	4.09	235	Unknown	Low	19	0.096	1.808	0.0504202	1
7	6	D14	E	P1	5.32	217	Unknown	Low	0	0	1.925	0	0
7	6	D14	F	P7	6.3	200	Symmetrical	Low	3	0.003	2.432	0.00123203	1
7	6	D14	G	P4	5.11	265	Asymmetrical	Medium	21	0.112	3.046	0.0354655	1
7	7	D07	A	P1	6.86	208	Asymmetrical	Medium	1	0	4.002	0	0
7	7	D07	B	P2	6.35	200	Asymmetrical	Low	0	0	2.405	0	0
7	7	D07	C	P6	5.35	244	Asymmetrical	High	2	0.001	2.666	0.000374953	1
7	7	D07	D	P3	5.24	225	Symmetrical	Medium	34	0.084	1.78	0.0450644	1
7	7	D07	E	P4	5.03	183	Unknown	High	9	0.086	1.947	0.042302	1
7	7	D07	F	P7	6.44	251	Symmetrical	Low	4	0.27	2.65	0.0924658	1
7	7	D07	G	P5	5.45	220	Unknown	Medium	17	0.044	1.851	0.023219	1
8	1	D28	A	P6	5.56	194	Asymmetrical	Medium	8	0.102	1.805	0.0534872	1
8	1	D28	B	P4	5.56	267	Symmetrical	Low	1	0.013	2.615	0.00494673	1
8	1	D28	C	P7	6.87	254	Symmetrical	Medium	0	0	2.552	0	0
8	1	D28	D	P3	4.55	217	Asymmetrical	Low	4	0.028	1.107	0.0246696	1
8	1	D28	E	P1	6.37	191	Asymmetrical	Low	8	0.038	2.314	0.0161565	1
8	1	D28	F	P2	5.03	210	Symmetrical	Low	0	0	0.907	0	0
8	1	D28	G	P5	4.83	252	Symmetrical	Medium	12	0.047	2.633	0.0175373	1
8	2	D01	A	P7	5.5	239	Symmetrical	Low	12	0.052	1.951	0.0259611	1
8	2	D01	B	P4	5.7	198	Symmetrical	Low	25	0.096	1.96	0.0466926	1
8	2	D01	C	P2	5.59	200	Unknown	Medium	0	0	1.393	0	0
8	2	D01	D	P6	6.33	196	Unknown	Medium	12	0.034	2.203	0.0151989	1
8	2	D01	E	P3	4.66	239	Unknown	Medium	18	0.053	1.475	0.0346859	1
8	2	D01	F	P1	5.34	248	Symmetrical	Low	1	0.003	1.825	0.00164114	1
8	2	D01	G	P5	5.27	213	Unknown	Low	31	0.106	2.118	0.0476619	1
8	3	C	A	P6	6.95	217	NA	NA	0	0	3.816	0	0
8	3	C	B	P5	5.24	244	NA	NA	0	0	1.764	0	0
8	3	C	C	P4	6.21	221	NA	NA	0	0	3.029	0	0
8	3	C	D	P2	6.35	230	NA	NA	0	0	2.901	0	0
8	3	C	E	P3	4.28	190	NA	NA	0	0	1.131	0	0
8	3	C	F	P7	4.44	190	NA	NA	0	0	1.125	0	0
8	3	C	G	P1	6.29	240	NA	NA	0	0	2.566	0	0
8	4	D07	A	P5	9.81	230	Unknown	High	43	0.201	6.118	0.0318088	1
8	4	D07	B	P7	6.43	209	Asymmetrical	High	10	0.024	4.009	0.00595091	1
8	4	D07	C	P6	6.2	210	Symmetrical	Low	0	0	2.295	0	0
8	4	D07	D	P3	4.57	185	Unknown	Low	16	0.054	0.968	0.0528376	1
8	4	D07	E	P4	5.88	233	Symmetrical	Medium	2	0.009	2.811	0.00319149	1
8	4	D07	F	P1	7.01	220	Asymmetrical	Medium	1	0.004	2.572	0.0015528	1
8	4	D07	G	P2	5.31	235	Unknown	Low	0	0	1.051	0	0
8	5	D04	A	P1	5.71	203	Symmetrical	Low	6	0.027	2.069	0.0128817	1
8	5	D04	B	P6	4.56	200	Asymmetrical	Low	6	0.023	1.401	0.0161517	1
8	5	D04	C	P5	5.36	237	Unknown	Medium	11	0.051	2.773	0.0180595	1
8	5	D04	D	P7	5.51	241	Asymmetrical	Low	NA	0.022	3.528	0.00619718	1
8	5	D04	E	P3	4.21	194	Unknown	Low	19	0.018	1.003	0.0176298	1
8	5	D04	F	P2	6.23	221	Asymmetrical	High	0	0	2.71	0	0
8	5	D04	G	P4	5.4	228	Asymmetrical	Medium	4	0.008	2.899	0.00275198	1
8	6	D14	A	P4	5.02	202	Symmetrical	Low	8	0.09	1.546	0.0550122	1
8	6	D14	B	P2	4.45	212	Unknown	Low	0	0	0.958	0	0
8	6	D14	C	P3	4.29	202	Unknown	Low	6	0.018	1.231	0.0144115	1
8	6	D14	D	P5	4.88	258	Symmetrical	Medium	12	0.058	1.349	0.0412225	1
8	6	D14	E	P7	5.05	207	Asymmetrical	Medium	16	0.102	1.672	0.0574972	1
8	6	D14	F	P6	6.08	236	Unknown	Low	15	0.18	2.702	0.0624566	1
8	6	D14	G	P1	5.2	241	Unknown	Low	18	0.086	1.832	0.0448384	1
8	7	D21	A	P1	6.08	237	Unknown	Low	0	0	1.973	0	0
8	7	D21	B	P7	5.83	258	Symmetrical	High	NA	0.013	4.608	0.00281324	1
8	7	D21	C	P6	5.01	229	Unknown	Low	15	0.11	3.077	0.0345152	1
8	7	D21	D	P3	4.6	248	Asymmetrical	Medium	11	0.15	2.134	0.0656743	1
8	7	D21	E	P5	5.38	213	Symmetrical	Medium	14	0.128	2.493	0.0488363	1
8	7	D21	F	P4	6.32	230	Unknown	Medium	1	0.003	3.432	0.000873362	1
8	7	D21	G	P2	5.72	165	Symmetrical	Low	0	0	1.383	0	0
9	1	D14	A	P2	6.44	195	Asymmetrical	High	8	0.057	2.658	0.0209945	1
9	1	D14	B	P6	6.08	238	Unknown	Medium	2	0.001	1.972	0.000506842	1
9	1	D14	C	P5	5.49	252	Unknown	Low	NA	0.134	2.865	0.0446816	1
9	1	D14	D	P1	5.3	223	Unknown	Low	0	0	2.881	0	0
9	1	D14	E	P3	4.55	238	Unknown	Medium	11		2.477	0	0
9	1	D14	F	P7	6.86	195	Symmetrical	High	2	0.021	1.781	0.0116537	1
9	1	D14	G	P4	4.35	238	Asymmetrical	Low	4	0.009	3.111	0.00288462	1
9	2	D21	A	P4	5.53	192	Unknown	Medium	12	0.106	2.502	0.0406442	1
9	2	D21	B	P6	5.18	180	Unknown	Low	3	0.017	1.841	0.00914962	1
9	2	D21	C	P1	7.18	248	Symmetrical	Medium	0	0	4.198	0	0
9	2	D21	D	P7	5.68	250	Unknown	Low	0	0	2.218	0	0
9	2	D21	E	P2	5.92	197	Unknown	High	0	0	3.848	0	0
9	2	D21	F	P3	4.74	247	Symmetrical	Low	12	0.146	1.98	0.0686736	1
9	2	D21	G	P5	6.55	225	Symmetrical	Low	9	0.004	2.121	0.00188235	1
9	3	D04	A	P3	5.14	228	Asymmetrical	Medium	18	0.045	2.065	0.021327	1
9	3	D04	B	P5	4.47	213	Symmetrical	Medium	23	0.013	2.148	0.00601573	1
9	3	D04	C	P2	5.93	166	Asymmetrical	Medium	6	0.012	2.513	0.00475248	1
9	3	D04	D	P4	5.65	252	Asymmetrical	Medium	3	0.006	4.269	0.00140351	1
9	3	D04	E	P7	6.85	203	Unknown	Low	0	0	1.383	0	0
9	3	D04	F	P6	5.16	190	Unknown	Low	0	0	1.472	0	0
9	3	D04	G	P1	5.6	196	Unknown	Low	0	0	1.696	0	0
9	4	D28	A	P4	5.16	209	Asymmetrical	Low	16	0.128	1.979	0.0607499	1
9	4	D28	B	P6	6.67	239	Unknown	High	4	0.073	3.522	0.020306	1
9	4	D28	C	P5	4.42	240	Symmetrical	Low	6	0.017	1.731	0.0097254	1
9	4	D28	D	P1	5.74	231	Unknown	Medium	0	0	2.275	0	0
9	4	D28	E	P7	5.61	180	Unknown	Medium	5	0.033	2.518	0.0129361	1
9	4	D28	F	P3	5.11	261	Symmetrical	Low	24	0.166	2.734	0.0572414	1
9	4	D28	G	P2	5.12	190	Asymmetrical	Low	0	0	1.563	0	0
9	5	C	A	P2	3.5	239	NA	NA	0	0	1.11	0	0
9	5	C	B	P7	7.55	248	NA	NA	0	0	5.094	0	0
9	5	C	C	P1	5.78	219	NA	NA	0	0	1.867	0	0
9	5	C	D	P3	3.58	200	NA	NA	0	0	0.833	0	0
9	5	C	E	P5	4.28	234	NA	NA	0	0	1.843	0	0
9	5	C	F	P4	5.4	218	NA	NA	0	0	2.336	0	0
9	5	C	G	P6	6.25	240	NA	NA	0	0	2.295	0	0
9	6	D07	A	P5	5.52	194	Symmetrical	Low	25	0.075	1.726	0.0416435	1
9	6	D07	B	P1	6.66	223	Symmetrical	Low	15	0.094	2.302	0.0392321	1
9	6	D07	C	P3	4.84	224	Asymmetrical	High	9	0.001	2.517	0.000397141	1
9	6	D07	D	P2	5.48	201	Asymmetrical	Medium	0	0	1.324	0	0
9	6	D07	E	P7	5.62	260	Symmetrical	Low	0	0	2.05	0	0
9	6	D07	F	P6	5.04	224	Unknown	Low	16	0.047	1.666	0.0274372	1
9	6	D07	G	P4	5.18	212	Symmetrical	Low	6	0.044	1.507	0.0283688	1
9	7	D01	A	P5	4.86	218	Symmetrical	Medium	17	0.067	1.793	0.0360215	1
9	7	D01	B	P6	6.08	200	Symmetrical	Low	1	0.002	2.455	0.000814001	1
9	7	D01	C	P4	5.37	223	Symmetrical	Low	11	0.044	1.701	0.0252149	1
9	7	D01	D	P1	5.71	220	Unknown	Low	0	0	1.413	0	0
9	7	D01	E	P7	7.4	232	Symmetrical	Medium	8	0.087	3.401	0.0249427	1
9	7	D01	F	P3	4.77	237	Symmetrical	Low	8	0.013	1.6	0.00805952	1
9	7	D01	G	P2	4.42	220	Asymmetrical	Low	6	0.027	2.383	0.0112033	1
10	1	D21	A	P2	4.17	195	Asymmetrical	Low	2	0.002	1.041	0.00191755	1
10	1	D21	B	P7	6.12	253	Unknown	Low	11	0.045	2.375	0.018595	1
10	1	D21	C	P4	6.66	210	Unknown	High	17	0.309	4.459	0.064807	1
10	1	D21	D	P1	5.82	235	Symmetrical	Low	0	0	2.407	0	0
10	1	D21	E	P5	4.61	201	Symmetrical	Low	13	0.133	2.137	0.0585903	1
10	1	D21	F	P3	5.92	246	Unknown	High	15	0.109	3.275	0.0322104	1
10	1	D21	G	P6	5.48	240	Asymmetrical	High	1	0.002	4.529	0.000441404	1
10	2	D04	A	P6	5.13	229	Unknown	Medium	19	0.038	2.602	0.0143939	1
10	2	D04	B	P2	4.58	202	Unknown	Medium	12	0.033	1.122	0.0285714	1
10	2	D04	C	P7	6.99	267	Asymmetrical	High	NA	0.099	5.034	0.019287	1
10	2	D04	D	P3	5.41	221	Unknown	Low	19	0.056	1.827	0.0297398	1
10	2	D04	E	P5	4.83	222	Unknown	High	37	0.087	3	0.0281827	1
10	2	D04	F	P1	7.3	219	Unknown	Low	4	0.016	0.831	0.0188902	1
10	2	D04	G	P4	5.76	170	Asymmetrical	High	2	0.03	2.919	0.0101729	1
10	3	D07	A	P1	5.76	241	Symmetrical	Low	5	0.028	2.195	0.0125956	1
10	3	D07	B	P5	4.92	204	Asymmetrical	Medium	13	0.061	2.405	0.0247364	1
10	3	D07	C	P4	6.1	192	Unknown	Medium	8	0.079	3.925	0.0197303	1
10	3	D07	D	P6	4.12	171	Unknown	Low	2	0.003	1.069	0.00279851	1
10	3	D07	E	P2	6.25	185	Asymmetrical	Medium	0	0	2.011	0	0
10	3	D07	F	P3	4.77	236	Unknown	Medium	17	0.04	1.665	0.0234604	1
10	3	D07	G	P7	7.4	244	Unknown	Medium	0	0	4.348	0	0
10	4	C	A	P5	5.98	242	NA	NA	0	0	2.64	0	0
10	4	C	B	P4	6.58	212	NA	NA	2	0	3.947	0	0
10	4	C	C	P7	7.07	237	NA	NA	0	0	2.916	0	0
10	4	C	D	P1	7.6	243	NA	NA	0	0	2.908	0	0
10	4	C	E	P3	4.52	210	NA	NA	0	0	1.1	0	0
10	4	C	F	P6	4.68	168	NA	NA	0	0	0.772	0	0
10	4	C	G	P2	4.17	149	NA	NA	0	0	0.529	0	0
10	5	D28	A	P6	5.13	208	Asymmetrical	Low	2	0.002	1.655	0.001207	1
10	5	D28	B	P5	4.78	243	Asymmetrical	Low	0	0	2.11	0	0
10	5	D28	C	P1	7.14	263	Asymmetrical	Medium	0	0	3.724	0	0
10	5	D28	D	P2	5.66	169	Asymmetrical	Low	3	0.001	1.317	0.000758725	1
10	5	D28	E	P4	5.77	249	Unknown	Low	19	0.049	2.83	0.0170198	1
10	5	D28	F	P7	5.07	182	Unknown	Low	9	0.038	1.497	0.0247557	1
10	5	D28	G	P3	4.47	234	Asymmetrical	Low	0	0	1.063	0	0
10	6	D14	A	P7	5.97	232	Unknown	Low	3	0.013	3.619	0.0035793	1
10	6	D14	B	P4	5.24	185	Symmetrical	Low	9	0.076	1.435	0.0502978	1
10	6	D14	C	P1	6.65	249	Asymmetrical	Low	0	0	2.654	0	0
10	6	D14	D	P5	4.84	258	Symmetrical	Medium	34	0.144	2.495	0.0545661	1
10	6	D14	E	P6	5.29	183	Symmetrical	Low	0	0	1.799	0	0
10	6	D14	F	P2	4.48	232	Asymmetrical	High	0	0	2.359	0	0
10	6	D14	G	P3	5.95	181	Asymmetrical	Medium	0	0	1.84	0	0
10	7	D01	A	P1	5.96	220	Unknown	Low	8	0.045	2.601	0.0170068	1
10	7	D01	B	P3	4.35	206	Asymmetrical	Medium	12	0.037	1.234	0.0291109	1
10	7	D01	C	P4	6.59	276	Unknown	Low	9	0.042	2.314	0.0178268	1
10	7	D01	D	P7	5.74	215	Unknown	Medium	11	0.044	1.706	0.0251429	1
10	7	D01	E	P2	4.25	183	Unknown	Low	4	0.016	0.831	0.0188902	1
10	7	D01	F	P5	5.51	243	Unknown	Low	14	0.05	1.851	0.0263019	1
10	7	D01	G	P6	5.08	228	Unknown	Low	5	0.005	1.688	0.00295334	1
11	1	C	A	P5	4.44	241	Symmetrical	Low	0	0	1.763	0	0
11	1	C	B	P4	5.58	221	NA	NA	0	0	1.924	0	0
11	1	C	C	P1	6.38	228	Symmetrical	Low	0	0	1.704	0	0
11	1	C	D	P7	5.08	260	Unknown	Medium	0	0	2.078	0	0
11	1	C	E	P2	4.01	171	NA	NA	0	0	0.907	0	0
11	1	C	F	P3	3.97	189	Asymmetrical	Medium	0	0	1.203	0	0
11	1	C	G	P6	7.71	267	Asymmetrical	High	0	0	4.092	0	0
11	2	D14	A	P1	6.13	205	Symmetrical	Low	3	0.03	1.671	0.0176367	1
11	2	D14	B	P5	5.63	223	Symmetrical	Medium	16	0.094	2.624	0.0345843	1
11	2	D14	C	P3	5.34	206	Unknown	Low	9	0.056	1.779	0.0305177	1
11	2	D14	D	P4	5.8	194	Unknown	Low	0	0	1.341	0	0
11	2	D14	E	P2	4.65	184	Asymmetrical	Low	0	0	1.108	0	0
11	2	D14	F	P6	5.78	210	Symmetrical	Low	0	0	2.004	0	0
11	2	D14	G	P7	6.69	213	Unknown	High	20	0.092	3.649	0.0245924	1
11	3	D01	A	P3	5.69	218	Symmetrical	High	21	0.081	3.456	0.0229008	1
11	3	D01	B	P4	5.79	241	Unknown	High	18	0.065	3.197	0.0199264	1
11	3	D01	C	P1	7.81	234	Asymmetrical	High	5	0.015	4.49	0.00332963	1
11	3	D01	D	P2	6.01	220	Asymmetrical	Medium	6	0.017	2.299	0.00734024	1
11	3	D01	E	P7	5.12	215	Unknown	Low	6	0.024	1.402	0.0168303	1
11	3	D01	F	P6	4.89	238	Unknown	Low	NA	0.043	1.577	0.0265432	1
11	3	D01	G	P5	3.94	211	Unknown	Medium	22	0.03	1.392	0.021097	1
11	4	D04	A	P3	4.17	230	Unknown	Medium	21	0.036	1.528	0.0230179	1
11	4	D04	B	P6	4.24	185	Unknown	Low	6	0.022	3.233	0.00675883	1
11	4	D04	C	P7	5.49	180	Unknown	Medium	5	0.018	2.872	0.00622837	1
11	4	D04	D	P5	5.01	238	Unknown	Medium	22	0.037	1.766	0.0205214	1
11	4	D04	E	P2	5.49	208	Symmetrical	Low	0	0	1.013	0	0
11	4	D04	F	P4	4.48	248	Unknown	Medium	12	0.081	3.619	0.0218919	1
11	4	D04	G	P1	6.79	212	Unknown	Medium	3	0.007	3.562	0.00196133	1
11	5	D21	A	P3	5.03	234	Unknown	Low	0	0	1.683	0	0
11	5	D21	B	P1	7.63	249	Symmetrical	Low	0	0	3.183	0	0
11	5	D21	C	P2	5.99	221	Unknown	Medium	0	0	3.204	0	0
11	5	D21	D	P6	4.82	217	Asymmetrical	Medium	14	0.126	1.735	0.0677055	1
11	5	D21	E	P4	4.98	280	Unknown	Low	7	0.09	2.559	0.0339751	1
11	5	D21	F	P5	4.65	195	Symmetrical	Low	4	0.033	2.217	0.0146667	1
11	5	D21	G	P7	5.18	201	Symmetrical	Low	NA	0.023	1.951	0.0116515	1
11	6	D28	A	P4	7.22	204	Asymmetrical	High	15	0.059	4.872	0.0119651	1
11	6	D28	B	P2	4.97	182	Asymmetrical	Low	5	0.009	1.798	0.00498063	1
11	6	D28	C	P6	4.83	205	Unknown	Low	3	0.025	2.759	0.00897989	1
11	6	D28	D	P3	5.02	251	Unknown	Medium	2	0	2.786	0	0
11	6	D28	E	P5	4.99	200	Symmetrical	Medium	3	0.008	3.553	0.00224656	1
11	6	D28	F	P1	6.24	215	Unknown	Low	3	0.003	2.424	0.00123609	1
11	6	D28	G	P7	5.19	212	Symmetrical	Low	0	0	1.386	0	0
11	7	D07	A	P1	6.58	234	Symmetrical	Low	7	0.037	3.677	0.0099623	1
11	7	D07	B	P5	5.49	220	Symmetrical	Low	9	0.108	2.214	0.0465116	1
11	7	D07	C	P4	5.25	217	Asymmetrical	Low	13	0.051	2.855	0.0175499	1
11	7	D07	D	P7	5.52	204	Unknown	Low	3	0.018	1.686	0.0105634	1
11	7	D07	E	P3	4.52	240	Symmetrical	Medium	NA	0.05	1.774	0.0274123	1
11	7	D07	F	P2	5.05	180	Asymmetrical	High	0	0	1.854	0	0
11	7	D07	G	P6	4.43	195	Asymmetrical	Medium	33	0.108	1.748	0.0581897	1
12	1	D07	A	P3	3.81	208	Symmetrical	Low	39	0.04	1.193	0.0324412	1
12	1	D07	B	P1	5.58	261	Asymmetrical	High	13	0.063	2.208	0.0277411	1
12	1	D07	C	P4	6.06	231	Symmetrical	Medium	21	0.164	3.525	0.0444565	1
12	1	D07	D	P5	4.19	232	Unknown	Low	15	0.071	1.735	0.0393134	1
12	1	D07	E	P2	3.86	181	Asymmetrical	Low	0	0	0.954	0	0
12	1	D07	F	P6	5	231	Asymmetrical	Low	6	0.011	1.345	0.00811209	1
12	1	D07	G	P7	5.7	192	Unknown	Low	8	0.034	1.001	0.0328502	1
12	2	D04	A	P3	4.66	223	Unknown	Medium	25	0.063	2.691	0.0228758	1
12	2	D04	B	P7	5.22	208	Unknown	Medium	11	0.045	1.422	0.0306748	1
12	2	D04	C	P1	6.73	206	Asymmetrical	Medium	2	0.009	3.431	0.00261628	1
12	2	D04	D	P2	5.13	220	Asymmetrical	Medium	11	0.026	1.89	0.0135699	1
12	2	D04	E	P4	5.53	252	Symmetrical	Low	22	0.057	2.709	0.0206074	1
12	2	D04	F	P5	4.46	231	Unknown	Low	5	0.029	1.537	0.0185185	1
12	2	D04	G	P6	5.22	223	Unknown	Medium	8	0.071	1.7	0.0400903	1
12	3	D14	A	P6	5.16	151	Asymmetrical	Low	3	0.019	1.195	0.0156507	1
12	3	D14	B	P7	4.78	208	Unknown	Low	1	0.004	1.485	0.00268637	1
12	3	D14	C	P5	4.61	210	Symmetrical	Low	15	0.104	1.408	0.0687831	1
12	3	D14	D	P4	6.29	233	Symmetrical	Low	14	0.051	1.963	0.0253227	1
12	3	D14	E	P1	5.96	216	Unknown	Low	0	0	2.285	0	0
12	3	D14	F	P3	4.73	180	Unknown	Medium	3	0.026	1.823	0.0140617	1
12	3	D14	G	P2	6.04	160	Asymmetrical	Medium	0	0	1.432	0	0
12	4	D21	A	P2	5.23	200	Asymmetrical	High	4	0.022	2.881	0.00757837	1
12	4	D21	B	P3	4.13	261	Asymmetrical	Low	1	0.001	1.302	0.00076746	1
12	4	D21	C	P7	5.81	210	Symmetrical	High	15	0.061	2.869	0.0208191	1
12	4	D21	D	P5	5.26	208	Unknown	Low	41	0.17	2.044	0.0767841	1
12	4	D21	E	P4	7.27	197	Asymmetrical	High	NA	0.19	8.268	0.0224639	1
12	4	D21	F	P6	5.16	213	Symmetrical	Low	1	0.001	1.871	0.000534188	1
12	4	D21	G	P1	6.11	202	Asymmetrical	Medium	0	0	3.03	0	0
12	5	C	A	P5	4.01	217	Symmetrical	Medium	0	0	2.211	0	0
12	5	C	B	P1	5.62	214	Unknown	Low	0	0	1.943	0	0
12	5	C	C	P7	4.02	199	Unknown	Low	0	0	1.533	0	0
12	5	C	D	P6	6.46	190	Unknown	High	0	0	4.413	0	0
12	5	C	E	P3	4.43	226	Unknown	Medium	0	0	1.693	0	0
12	5	C	F	P2	6.47	193	Symmetrical	Medium	0	0	1.813	0	0
12	5	C	G	P4	4.46	261	Symmetrical	Low	0	0	3.116	0	0
12	6	D28	A	P4	6.2	240	Symmetrical	Low	17	0.166	3.181	0.0495967	1
12	6	D28	B	P1	5.84	241	Symmetrical	Low	0	0	2.161	0	0
12	6	D28	C	P6	5.99	203	Symmetrical	Medium	0	0	3.395	0	0
12	6	D28	D	P7	5.09	235	Symmetrical	Low	0	0	1.687	0	0
12	6	D28	E	P5	4.15	234	Asymmetrical	Medium	8	0.06	1.967	0.0296004	1
12	6	D28	F	P3	3.68	221	Unknown	Low	23	0.078	2.518	0.0300462	1
12	6	D28	G	P2	4.93	220	Unknown	Medium	16	0.047	2.436	0.0189287	1
12	7	D01	A	P4	5.38	228	Symmetrical	Low	12	0.034	1.644	0.0202622	1
12	7	D01	B	P2	5.18	216	Unknown	Medium	7	0.03	1.485	0.019802	1
12	7	D01	C	P1	4.75	228	Symmetrical	Low	7	0.033	2.855	0.0114266	1
12	7	D01	D	P5	4.33	222	Unknown	Medium	19	0.032	1.757	0.0178871	1
12	7	D01	E	P7	4.69	178	Symmetrical	Low	0	0	1.075	0	0
12	7	D01	F	P3	4.58	193	Unknown	Medium	25	0.052	1.595	0.0315726	1
12	7	D01	G	P6	4.19	246	Unknown	High	18	0.055	2.511	0.0214341	1

## Sheet: Copy of Data
Tray	Column	Treatment	Row	Plant	StemWidth_mm	Height_mm	ConeVol	LogConeVol	LogStemDryMass_g	Cutting Symmetry	DegreeOfBranching	NoOfRootingPts	RootMass_g	StemDryMass_g	RootFraction	Rooted
1	1	D04	A	P1	5.92	220	2018.53	3.30503	0.518646	Asymmetrical	High	21	0.135	3.301	0.0392899	1
1	1	D04	B	P5	7.05	225	2927.72	3.46653	0.549984	Unknown	Medium	NA	0.101	3.548	0.0276788	1
1	1	D04	C	P2	5.53	212				Asymmetrical	Medium	NA	0.036	3.415	0.0104318	1
1	1	D04	D	P7	5.94	243				Unknown	Medium	7	0.011	2.758	0.00397255	1
1	1	D04	E	P6	5.93	229				Asymmetrical	Medium	NA	0.038	2.582	0.0145038	1
1	1	D04	F	P3	5.04	234				Unknown	Medium	6	0.006	2.324	0.00257511	1
1	1	D04	G	P4	6.56	216				Unknown	High	16	0.062	4.633	0.0132055	1
1	2	D28	A	P5	5.61	249	2051.6	3.31209	0.556303	Symmetrical	High	NA	0.178	3.6	0.0471149	1
1	2	D28	B	P3	5.07	195				Unknown	High	17	0.031	1.494	0.0203279	1
1	2	D28	C	P6	6.26	246				Asymmetrical	Medium	0	0	3.363	0	0
1	2	D28	D	P4	5.24	214				Unknown	High	3	0.001	2.956	0.000338181	1
1	2	D28	E	P1	6.45	230				Unknown	Low	0	0	2.07	0	0
1	2	D28	F	P2	7.21	216				Asymmetrical	High	3	0.027	3.295	0.00812763	1
1	2	D28	G	P7	6.44	212				Unknown	Medium	0	0	3.64	0	0
1	3	D21	A	P3	6.83	195				Unknown	Medium	6	0.019	3.203	0.00589696	1
1	3	D21	B	P6	5.54	225				Unknown	Low	NA	0.025	2.831	0.0087535	1
1	3	D21	C	P7	5.19	244				Unknown	Low	6	0.031	3.323	0.0092427	1
1	3	D21	D	P4	5.99	270				Symmetrical	Low	7	0.03	3.424	0.00868558	1
1	3	D21	E	P5	5.55	247	1991.83	3.29925	0.437116	Symmetrical	Low	10	0.143	2.736	0.04967	1
1	3	D21	F	P2	4.89	133				Unknown	High	0	0	1.127	0	0
1	3	D21	G	P1	6.34	253				Unknown	Low	0	0	2.913	0	0
1	4	D14	A	P1	5.85	238				Symmetrical	Low	3	0.007	1.475	0.00472335	1
1	4	D14	B	P3	4.3	242				Symmetrical	Medium	NA	0.011	2.639	0.00415094	1
1	4	D14	C	P5	5.79	280	2457.44	3.39048	0.3934	Symmetrical	Low	13	0.108	2.474	0.041828	1
1	4	D14	D	P2	6.47	209				Asymmetrical	High	NA	0.011	2.629	0.00416667	1
1	4	D14	E	P6	6.69	224				Unknown	Medium	2	0.001	2.757	0.000362582	1
1	4	D14	F	P7	6.8	244				Asymmetrical	Low	0	0	2	0	0
1	4	D14	G	P4	5.14	232	1604.66	3.20538	0.229426	Symmetrical	Low	9	0.13	1.696	0.0711939	1
1	5	D07	A	P1	5.73	231				Asymmetrical	High	16	0.094	3.926	0.0233831	1
1	5	D07	B	P3	5.7	212	1803.24	3.25605	0.322219	Symmetrical	Medium	14	0.105	2.1	0.047619	1
1	5	D07	C	P4	4.75	197				Unknown	Medium	8	0.029	2.268	0.0126252	1
1	5	D07	D	P6	5.16	214				Unknown	Low	0	0	2.311	0	0
1	5	D07	E	P2	6.4	165				Symmetrical	Medium	5	0.003	1.692	0.00176991	1
1	5	D07	F	P5	5.53	233				Symmetrical	Low	13	0.038	1.712	0.0217143	1
1	5	D07	G	P7	6.13	239				Unknown	High	NA	0.025	2.364	0.0104646	1
1	6	D01	A	P5	5.57	240	1949.35	3.28989	0.400711	Asymmetrical	High	39	0.108	2.516	0.0411585	1
1	6	D01	B	P6	4.63	208				Symmetrical	Low	9	0.037	1.379	0.0261299	1
1	6	D01	C	P3	6.04	225				Unknown	Medium	20	0.036	2.116	0.0167286	1
1	6	D01	D	P4	5.93	223				Symmetrical	Low	10	0.017	1.744	0.00965361	1
1	6	D01	E	P2	4.34	183				Asymmetrical	Low	6	0.016	1.246	0.0126783	1
1	6	D01	F	P1	5.17	199				Symmetrical	Low	NA	0.01	1.612	0.00616523	1
1	6	D01	G	P7	6.36	206				Symmetrical	Low	5	0.024	2.073	0.0114449	1
1	7	C	A	P7	6.73	191				Symmetrical	Low	0	0	2.822	0	0
1	7	C	B	P6	5.44	242				Asymmetrical	Low	0	0	2.104	0	0
1	7	C	C	P5	5.11	270				Asymmetrical	Medium	0	0	2.851	0	0
1	7	C	D	P3	4.99	229				Unknown	Low	0	0	1.61	0	0
1	7	C	E	P2	5.87	204				Symmetrical	Low	0	0	2.582	0	0
1	7	C	F	P1	6.93	240				NA	NA	0	0	2.445	0	0
1	7	C	G	P4	6.36	280				NA	NA	0	0	2.809	0	0
2	1	D01	A	P2	4.58	160				Unknown	Low	NA	0.006	0.669	0.00888889	1
2	1	D01	B	P5	6.87	285	3521.49	3.54673	0.533009	Unknown	Low	35	0.22	3.412	0.0605727	1
2	1	D01	C	P7	5.97	215				Symmetrical	Low	8	0.039	2.384	0.0160957	1
2	1	D01	D	P3	6.67	221				Symmetrical	High	40	0.094	3.19	0.0286236	1
2	1	D01	E	P6	5.88	207				Unknown	Low	0	0	2.089	0	0
2	1	D01	F	P4	6.43	249				Unknown	Low	25	0.063	1.98	0.030837	1
2	1	D01	G	P1	5.34	260				Unknown	Low	0	0	2.376	0	0
2	2	D04	A	P5	5.06	230				Unknown	Medium	45	0.075	2.554	0.028528	1
2	2	D04	B	P3	5.18	234				Asymmetrical	Low	18	0.031	1.812	0.0168204	1
2	2	D04	C	P7	5.32	223				Symmetrical	Low	NA	0.015	2.104	0.00707881	1
2	2	D04	D	P2	6.46	201				Asymmetrical	High	0	0	3.366	0	0
2	2	D04	E	P4	5.77	190				Unknown	Medium	14	0.062	2.973	0.0204283	1
2	2	D04	F	P6	7.13	237				Unknown	High	7	0.024	3.176	0.0075	1
2	2	D04	G	P1	4.83	238				Symmetrical	Low	17	0.037	1.371	0.0262784	1
2	3	D28	A	P3	5.61	257				Unknown	Medium	0	0	2.744	0	0
2	3	D28	B	P5	5.7	280	2381.64	3.37688	0.351023	Symmetrical	Medium	12	0.113	2.244	0.0479423	1
2	3	D28	C	P4	6.19	263				Symmetrical	Low	9	0.05	2.827	0.0173792	1
2	3	D28	D	P1	6.51	221				Unknown	Low	0	0	2.083	0	0
2	3	D28	E	P6	5.44	201				Unknown	Low	4	0.02	3.046	0.00652316	1
2	3	D28	F	P2	3.68	170				Unknown	Low	0	0	0.749	0	0
2	3	D28	G	P7	5.31	222				Symmetrical	Low	0	0	1.372	0	0
2	4	D07	A	P4	4.86	224				Unknown	Medium	33	0.098	2.032	0.0460094	1
2	4	D07	B	P5	6.14	225	2220.69	3.34649	0.489537	Asymmetrical	High	31	0.164	3.087	0.050446	1
2	4	D07	C	P7	6.44	281				Asymmetrical	Low	0	0	2.884	0	0
2	4	D07	D	P6	6.13	242				Symmetrical	Low	0	0	2.234	0	0
2	4	D07	E	P1	6.39	233				Symmetrical	Low	7	0.07	2.881	0.0237208	1
2	4	D07	F	P2	5.82	184				Asymmetrical	Low	0	0	1.554	0	0
2	4	D07	G	P3	4.98	252				Symmetrical	Low	0	0	2.003	0	0
2	5	C	A	P5	7.43	220				NA	NA	5	0.001	4.331	0.00023084	1
2	5	C	B	P2	6.04	209				NA	NA	0	0	1.964	0	0
2	5	C	C	P4	7.09	210				NA	NA	0	0	4.153	0	0
2	5	C	D	P6	7.04	239				NA	NA	0	0	2.59	0	0
2	5	C	E	P7	6.07	234				NA	NA	0	0	2.319	0	0
2	5	C	F	P3	6.9	240				NA	NA	0	0	2.459	0	0
2	5	C	G	P1	5.18	224				NA	NA	0	0	1.905	0	0
2	6	D21	A	P1	4.1	230				Symmetrical	Low	0	0	1.643	0	0
2	6	D21	B	P6	5.13	216				Symmetrical	Low	1	0.021	2.225	0.00934996	1
2	6	D21	C	P3	4.57	191				Symmetrical	Low	3	0.007	1.376	0.00506146	1
2	6	D21	D	P7	6.16	217				Symmetrical	Low	0	0	2.482	0	0
2	6	D21	E	P5	5.12	262	1798.08	3.25481	0.377852	Unknown	Medium	18	0.143	2.387	0.0565217	1
2	6	D21	F	P2	5.86	223				Asymmetrical	Medium	2	0.003	2.463	0.00121655	1
2	6	D21	G	P4	5.75	233				Asymmetrical	Medium	0	0	2.564	0	0
2	7	D14	A	P4	6.01	245				Symmetrical	Low	5	0.012	2.921	0.00409137	1
2	7	D14	B	P7	5.21	253				Symmetrical	Low	4	0.022	2.021	0.0107685	1
2	7	D14	C	P2	5.47	180				Asymmetrical	Medium	3	0.018	1.58	0.0112641	1
2	7	D14	D	P5	7.18	211	2847.74	3.4545	0.585461	Symmetrical	High	18	0.135	3.85	0.033877	1
2	7	D14	E	P3	4.66	199	1131.34	3.05359	0.470998	Symmetrical	Medium	15	0.138	2.958	0.0445736	1
2	7	D14	F	P6	6.91	218				Asymmetrical	Low	0	0	2.586	0	0
2	7	D14	G	P1	6.71	231				Unknown	Low	0	0	3.824	0	0
3	1	D14	A	P5	6.51	271	3006.77	3.4781	0.388279	Unknown	Medium	23	0.169	2.445	0.0646519	1
3	1	D14	B	P4	7.18	190				Unknown	High	0	0	3.224	0	0
3	1	D14	C	P7	6.38	231				Unknown	Low	3	0.023	1.924	0.011813	1
3	1	D14	D	P1	6.47	229				Unknown	Low	1	0.001	1.937	0.000515996	1
3	1	D14	E	P6	5.24	204	1466.43	3.16626	0.422426	Asymmetrical	Medium	33	0.1	2.645	0.0364299	1
3	1	D14	F	P2	5.79	201				Unknown	High	0	0	2.955	0	0
3	1	D14	G	P3	4.2	232	1071.41	3.02996	0.20085	Symmetrical	Medium	20	0.1	1.588	0.0592417	1
3	2	D28	A	P7	6.71	224				Asymmetrical	Medium	6	0.022	2.613	0.00834915	1
3	2	D28	B	P1	5.32	241				Symmetrical	Low	1	0.004	3.266	0.00122324	1
3	2	D28	C	P5	5.22	260	1854.74	3.26828	0.474071	Symmetrical	Low	27	0.216	2.979	0.0676056	1
3	2	D28	D	P2	7.65	192				Asymmetrical	Medium	0	0	3.33	0	0
3	2	D28	E	P3	5.24	227				Unknown	Low	13	0.097	2.504	0.0372933	1
3	2	D28	F	P6	6.24	222				Unknown	High	0	0	3.452	0	0
3	2	D28	G	P4	6.27	221	2274.55	3.3569	0.56573	Unknown	Low	19	0.199	3.679	0.0513151	1
3	3	C	A	P3	5.77	242				Unknown	Medium	0	0	2.456	0	0
3	3	C	B	P7	5.32	254				Symmetrical	Low	0	0	2	0	0
3	3	C	C	P2	5.74	202				Asymmetrical	Medium	0	0	1.553	0	0
3	3	C	D	P1	5.82	248				Asymmetrical	Medium	0	0	3.081	0	0
3	3	C	E	P6	5.5	232				Unknown	Low	0	0	2.327	0	0
3	3	C	F	P5	5.71	243				NA	NA	0	0	2.595	0	0
3	3	C	G	P4	4.65	200				Symmetrical	Low	0	0	1.373	0	0
3	4	D01	A	P7	7.34	245				Unknown	Medium	13	0.086	6.67	0.0127294	1
3	4	D01	B	P1	5.77	265				Symmetrical	Low	10	0.047	2.294	0.0200769	1
3	4	D01	C	P4	5.46	250				Symmetrical	Low	11	0.037	2.206	0.0164958	1
3	4	D01	D	P6	6.97	233				Symmetrical	Low	3	0.003	2.774	0.0010803	1
3	4	D01	E	P5	6.27	247				Unknown	Low	7	0.032	3.395	0.00933761	1
3	4	D01	F	P2	6.83	221				Unknown	High	0	0	2.255	0	0
3	4	D01	G	P3	6	240				Unknown	High	18	0.063	2.923	0.0210985	1
3	5	D04	A	P7	6.18	250				Unknown	Medium	NA	0.083	3.454	0.0234662	1
3	5	D04	B	P1	6.12	229				Unknown	Low	10	0.029	2.482	0.0115492	1
3	5	D04	C	P6	6.99	258				Asymmetrical	High	4	0.008	5.872	0.00136054	1
3	5	D04	D	P2	5.98	200				Asymmetrical	Medium	1	0.009	1.57	0.00569981	1
3	5	D04	E	P3	4.88	227				Unknown	Medium	1	0.002	1.582	0.00126263	1
3	5	D04	F	P4	5.56	269				Asymmetrical	Medium	10	0.041	3.056	0.0132386	1
3	5	D04	G	P5	5.67	250				Symmetrical	Medium	29	0.058	3.263	0.0174646	1
3	6	D21	A	P6	5.63	221				Unknown	Medium	0	0	1.932	0	0
3	6	D21	B	P3	3.88	223	878.895	2.94394	0.264582	Symmetrical	Low	19	0.21	1.839	0.102489	1
3	6	D21	C	P7	6.54	277				Asymmetrical	Medium	0	0	3.847	0	0
3	6	D21	D	P4	5.58	222	1809.63	3.25759	0.337459	Unknown	Low	NA	0.124	2.175	0.0539365	1
3	6	D21	E	P5	4.64	267				Symmetrical	Low	9	0.089	2.243	0.0381647	1
3	6	D21	F	P1	5.21	220				Unknown	Low	0	0	1.613	0	0
3	6	D21	G	P2	4.89	160				Unknown	Low	0	0	0.884	0	0
3	7	D07	A	P1	5.56	227				Unknown	Low	3	0.015	1.842	0.00807754	1
3	7	D07	B	P7	5.81	277				Symmetrical	Low	15	0.04	2.664	0.0147929	1
3	7	D07	C	P5	4.51	249	1325.93	3.12252	0.307924	Unknown	Low	43	0.124	2.032	0.0575139	1
3	7	D07	D	P4	6.08	186				Unknown	Medium	7	0.055	2.864	0.0188421	1
3	7	D07	E	P3	5.34	237				Symmetrical	Low	17	0.059	2.124	0.027027	1
3	7	D07	F	P2	4.54	238				Asymmetrical	Low	4	0.012	0.975	0.0121581	1
3	7	D07	G	P6	5.07	224				Symmetrical	Low	0	0	1.616	0	0
4	1	D28	A	P5	5.31	256				Asymmetrical	Medium	NA	0.051	3.163	0.0158681	1
4	1	D28	B	P4	6.74	211				Symmetrical	Low	NA	0.031	3.132	0.00980082	1
4	1	D28	C	P7	5.34	183				Unknown	Low	NA	0.084	2.163	0.0373832	1
4	1	D28	D	P6	6.64	221				Unknown	Medium	NA	0.017	3.578	0.00472879	1
4	1	D28	E	P1	6.78	218				Unknown	Low	0	0	2.139	0	0
4	1	D28	F	P2	4.74	198				Unknown	Low	0	0	1.347	0	0
4	1	D28	G	P3	6.23	212	2154.17	3.33328	0.691877	Symmetrical	High	NA	0.309	4.919	0.0591048	1
4	2	D07	A	P6	5.9	218	1986.69	3.29813	0.245759	Symmetrical	Low	NA	0.108	1.761	0.0577849	1
4	2	D07	B	P3	5.43	252				Unknown	Low	12	0.08	1.85	0.0414508	1
4	2	D07	C	P5	5.3	257				Symmetrical	Low	5	0.079	2.448	0.0312624	1
4	2	D07	D	P1	5.03	234				Unknown	Low	10	0.07	1.961	0.0344658	1
4	2	D07	E	P7	5.61	241				Symmetrical	Low	0	0	2.532	0	0
4	2	D07	F	P2	5.34	225				Asymmetrical	Low	4	0.011	1.132	0.0096238	1
4	2	D07	G	P4	5.65	174				Unknown	High	0	0	2.684	0	0
4	3	C	A	P6	5.61	233				NA	NA	0	0	1.892	0	0
4	3	C	B	P1	7.16	213				NA	NA	0	0	3.819	0	0
4	3	C	C	P5	5.76	260				NA	NA	0	0	2.103	0	0
4	3	C	D	P7	6.01	243				NA	NA	0	0	1.909	0	0
4	3	C	E	P4	6.25	233				NA	NA	0	0	2.161	0	0
4	3	C	F	P2	6.44	199				NA	NA	0	0	1.133	0	0
4	3	C	G	P3	5.54	190				NA	NA	0	0	2.154	0	0
4	4	D01	A	P6	5.78	224				Symmetrical	Low	3	0.013	2.502	0.00516899	1
4	4	D01	B	P5	4.87	226				Symmetrical	Low	NA	0.023	1.433	0.0157967	1
4	4	D01	C	P7	6.9	232				Asymmetrical	High	19	0.049	4.249	0.0114007	1
4	4	D01	D	P4	7.17	198				Asymmetrical	High	NA	0.045	5.296	0.00842539	1
4	4	D01	E	P2	5.54	183				Unknown	High	NA	0.008	1.982	0.0040201	1
4	4	D01	F	P3	4.99	218				Unknown	High	NA	0.007	2.281	0.00305944	1
4	4	D01	G	P1	7.66	214				Asymmetrical	High	NA	0.044	3.722	0.0116835	1
4	5	D14	A	P4	4.84	208				Symmetrical	Low	NA	0.05	1.496	0.0323415	1
4	5	D14	B	P2	4.86	217				Asymmetrical	High	1	0.004	1.863	0.00214247	1
4	5	D14	C	P7	5.69	269				Unknown	Low	0	0	1.636	0	0
4	5	D14	D	P1	5.15	209				Asymmetrical	Medium	NA	0.03	3.134	0.00948167	1
4	5	D14	E	P3	5.07	253	1702.57	3.23111	0.448397	Unknown	High	19	0.237	2.808	0.0778325	1
4	5	D14	F	P5	4.82	251	1526.64	3.18374	0.0429691	Symmetrical	High	NA	0.151	1.104	0.120319	1
4	5	D14	G	P6	6.03	199				Asymmetrical	High	0	0	3.195	0	0
4	6	D21	A	P1	5.13	217				Asymmetrical	Low	0	0	1.353	0	0
4	6	D21	B	P4	5.32	186				Asymmetrical	Low	NA	0.073	1.69	0.0414067	1
4	6	D21	C	P2	4.66	170				Unknown	Low	4	0.016	1.741	0.00910643	1
4	6	D21	D	P5	5.86	257	2310.45	3.3637	0.517987	Symmetrical	Low	10	0.214	3.296	0.0609687	1
4	6	D21	E	P6	5.06	204				Asymmetrical	Low	NA	0.025	1.991	0.0124008	1
4	6	D21	F	P7	6.63	195				Unknown	Medium	NA	0.017	2.531	0.0066719	1
4	6	D21	G	P3	4.73	213				Symmetrical	Low	NA	0.083	1.82	0.0436153	1
4	7	D04	A	P1	7.54	236				Unknown	High	NA	0.011	3.284	0.00333839	1
4	7	D04	B	P4	6.28	238				Symmetrical	Low	15	0.042	2.949	0.0140421	1
4	7	D04	C	P2	5.71	231				Unknown	Low	NA	0.02	1.913	0.0103466	1
4	7	D04	D	P6	5.65	210				Asymmetrical	High	11	0.026	3.45	0.00747986	1
4	7	D04	E	P7	5.78	280				Symmetrical	Low	4	0.009	3.601	0.00249307	1
4	7	D04	F	P5	4.51	253				Unknown	Low	10	0.031	1.6	0.0190067	1
4	7	D04	G	P3	5.62	230				Symmetrical	Medium	10	0.057	3.383	0.0165698	1
5	1	D21	A	P5	5.46	246				Unknown	Medium	11	0.076	3.47	0.0214326	1
5	1	D21	B	P6	5.24	208				Unknown	Medium	1	0.001	2.235	0.000447227	1
5	1	D21	C	P2	5.32	225				Asymmetrical	Medium	0	0	2.425	0	0
5	1	D21	D	P1	5.39	223				Symmetrical	Low	0	0	1.925	0	0
5	1	D21	E	P7	6.87	201				Unknown	Medium	2	0.001	2.351	0.00042517	1
5	1	D21	F	P4	6.61	234				Symmetrical	Low	5	0.047	2.071	0.0221907	1
5	1	D21	G	P3	4.29	215				Asymmetrical	Medium	1	0.002	1.713	0.00116618	1
5	2	D01	A	P6	7.13	220				Unknown	High	5	0.025	4.56	0.00545256	1
5	2	D01	B	P4	5.63	209				Unknown	Low	20	0.072	1.764	0.0392157	1
5	2	D01	C	P7	7.49	210	3084.26	3.48915	0.492481	Unknown	High	24	0.109	3.108	0.0338825	1
5	2	D01	D	P1	5.73	234				Unknown	Medium	24	0.08	2.946	0.0264375	1
5	2	D01	E	P3	6.54	251				Symmetrical	High	31	0.065	2.529	0.0250578	1
5	2	D01	F	P2	4.03	200				Asymmetrical	Low	2	0.004	0.785	0.00506971	1
5	2	D01	G	P5	5.41	238				Symmetrical	Medium	NA	0.089	2.499	0.0343895	1
5	3	D07	A	P7	6.83	280				Symmetrical	Low	9	0.056	5.068	0.010929	1
5	3	D07	B	P1	5.44	208				Asymmetrical	Medium	17	0.093	2.472	0.0362573	1
5	3	D07	C	P2	5.01	195				Unknown	Low	7	0.019	1.402	0.0133709	1
5	3	D07	D	P3	5.81	237				Unknown	Medium	NA	0.056	2.274	0.0240343	1
5	3	D07	E	P5	4.67	210				Symmetrical	Medium	35	0.073	1.632	0.0428152	1
5	3	D07	F	P6	6.27	206				Unknown	Medium	1	0.001	2.595	0.000385208	1
5	3	D07	G	P4	5.93	205				Unknown	Medium	1	0.009	2.929	0.00306331	1
5	4	C	A	P5	5.52	227				NA	NA	0	0	2.476	0	0
5	4	C	B	P3	5.12	247				NA	NA	0	0	1.791	0	0
5	4	C	C	P7	6.13	202				NA	NA	0	0	3.076	0	0
5	4	C	D	P2	5.42	243				NA	NA	0	0	2.32	0	0
5	4	C	E	P6	6.05	239				NA	NA	0	0	2.973	0	0
5	4	C	F	P1	5.94	254				NA	NA	0	0	2.686	0	0
5	4	C	G	P4	6.47	270				NA	NA	0	0	3.334	0	0
5	5	D04	A	P1	6.45	247				Symmetrical	Medium	8	0.023	3.851	0.00593702	1
5	5	D04	B	P6	4.75	201				Asymmetrical	High	23	0.051	1.873	0.0265073	1
5	5	D04	C	P5	5.45	256	1990.68	3.299	0.531734	Unknown	High	27	0.165	3.402	0.0462574	1
5	5	D04	D	P2	5.16	209				Symmetrical	Low	10	0.039	1.728	0.0220713	1
5	5	D04	E	P3	4.75	230	1358.58	3.13308	0.184407	Unknown	Low	14	0.109	1.529	0.0665446	1
5	5	D04	F	P4	5.86	185				Asymmetrical	Medium	6	0.06	2.075	0.028103	1
5	5	D04	G	P7	6.19	255				Symmetrical	Low	7	0.027	2.126	0.0125406	1
5	6	D28	A	P7	7.01	202				Asymmetrical	Medium	5	0.004	3.058	0.00130634	1
5	6	D28	B	P4	6.59	243				Symmetrical	Low	0	0	2.963	0	0
5	6	D28	C	P3	5.66	238				Unknown	High	9	0.078	2.31	0.0326633	1
5	6	D28	D	P6	6.59	228				Asymmetrical	Medium	8	0.015	3.254	0.00458856	1
5	6	D28	E	P2	5.82	235				Asymmetrical	High	0	0	2.284	0	0
5	6	D28	F	P1	7.46	219				Symmetrical	Low	6	0.024	3.559	0.0066983	1
5	6	D28	G	P5	6.04	188				Unknown	High	7	0.066	3.508	0.0184667	1
5	7	D14	A	P6	5.43	218				Symmetrical	Low	1	0.003	3.508	0.000854457	1
5	7	D14	B	P5	6.28	201	2075.31	3.31708	0.426511	Unknown	High	19	0.106	2.67	0.0381844	1
5	7	D14	C	P2	5.89	257				Unknown	Medium	12	0.079	3.153	0.0244431	1
5	7	D14	D	P3	4.78	268				Unknown	Medium	0	0	1.902	0	0
5	7	D14	E	P7	6.78	173	2081.97	3.31847	0.469822	Asymmetrical	High	16	0.155	2.95	0.0499195	1
5	7	D14	F	P1	5.54	245	1968.59	3.29415	0.708166	Asymmetrical	High	NA	0.169	5.107	0.0320318	1
5	7	D14	G	P4	7.85	165	2661.9	3.42519	0.475962	Unknown	Medium	17	0.153	2.992	0.0486486	1
6	1	D21	A	P2	4.88	200				Unknown	Low	3	0.01	2.391	0.00416493	1
6	1	D21	B	P5	4.95	230	1475.39	3.16891	0.319314	Asymmetrical	Medium	14	0.109	2.086	0.0496583	1
6	1	D21	C	P7	5.45	193				Unknown	High	11	0.075	2.939	0.0248839	1
6	1	D21	D	P4	4.9	205				Unknown	High	8	0.096	3.24	0.028777	1
6	1	D21	E	P3	4.41	202				Asymmetrical	Low	0	0	0.958	0	0
6	1	D21	F	P6	6.72	237	2801.92	3.44746	0.532245	Asymmetrical	High	14	0.247	3.406	0.0676157	1
6	1	D21	G	P1	6.43	240				Symmetrical	Low	0	0	2.585	0	0
6	2	D14	A	P4	5.52	234	1866.65	3.27106	0.409933	Symmetrical	Low	20	0.138	2.57	0.0509601	1
6	2	D14	B	P1	6.29	201				Asymmetrical	Medium	0	0	3.433	0	0
6	2	D14	C	P7	6.12	220				Symmetrical	Low	3	0.008	1.388	0.00573066	1
6	2	D14	D	P6	5.6	231				Unknown	Medium	0	0	2.971	0	0
6	2	D14	E	P3	5.74	268				Symmetrical	Low	12	0.034	2.813	0.0119424	1
6	2	D14	F	P2	5.37	233				Unknown	Low	NA	0.017	2.24	0.00753212	1
6	2	D14	G	P5	4.72	226	1318.14	3.11996	0.401745	Asymmetrical	Medium	19	0.103	2.522	0.0392381	1
6	3	D04	A	P2	4.52	181				Asymmetrical	Low	11	0.03	2.257	0.0131176	1
6	3	D04	B	P5	5.46	269				Unknown	Medium	23	0.031	3.212	0.00955905	1
6	3	D04	C	P6	4.61	213				Unknown	Medium	14	0.023	2.056	0.011063	1
6	3	D04	D	P4	5.74	228	1966.65	3.29373	0.407561	Symmetrical	Low	24	0.113	2.556	0.042338	1
6	3	D04	E	P3	4.97	212				Symmetrical	Medium	5	0.006	2.443	0.00244998	1
6	3	D04	F	P1	7.43	270				Unknown	Medium	1	0.002	3.324	0.000601323	1
6	3	D04	G	P7	5.52	213				Unknown	Medium	5	0.011	2.235	0.0048976	1
6	4	D01	A	P7	5.65	206				Unknown	Medium	17	0.055	2.355	0.0228216	1
6	4	D01	B	P4	5.36	230				Symmetrical	Low	12	0.025	1.649	0.0149343	1
6	4	D01	C	P5	5.7	243				Unknown	Medium	16	0.035	3.365	0.0102941	1
6	4	D01	D	P1	7.34	210				Asymmetrical	Low	27	0.062	1.721	0.0347729	1
6	4	D01	E	P6	4.72	223				Unknown	Low	8	0.026	1.921	0.0133539	1
6	4	D01	F	P2	6.71	221				Unknown	Low	3	0.001	1.804	0.000554017	1
6	4	D01	G	P3	4.73	215				Unknown	Medium	22	0.07	1.602	0.041866	1
6	5	D28	A	P2	4.23	190				Asymmetrical	Low	5	0.026	1.686	0.0151869	1
6	5	D28	B	P3	5.42	265				Unknown	Medium	3	0.008	3.13	0.00254939	1
6	5	D28	C	P6	5.78	213	1862.96	3.2702	0.634477	Asymmetrical	Medium	12	0.11	4.31	0.0248869	1
6	5	D28	D	P4	5.6	220				Unknown	Low	2	0.005	2.478	0.00201369	1
6	5	D28	E	P1	5.22	230				Unknown	Low	0	0	1.631	0	0
6	5	D28	F	P5	5.23	241	1725.79	3.23699	0.627878	Symmetrical	Medium	14	0.125	4.245	0.0286041	1
6	5	D28	G	P7	6.76	209				Symmetrical	High	0	0	3.257	0	0
6	6	C	A	P6	7.14	200				Unknown	High	0	0	4.017	0	0
6	6	C	B	P1	5.72	190				NA	NA	0	0	1.885	0	0
6	6	C	C	P4	5.32	251				Asymmetrical	Low	0	0	2.252	0	0
6	6	C	D	P3	4.86	200				Symmetrical	Low	0	0	1.304	0	0
6	6	C	E	P7	5.88	207				Asymmetrical	Medium	2	0	3.433	0	0
6	6	C	F	P2	5.84	196				Symmetrical	Low	0	0	1.323	0	0
6	6	C	G	P5	5.26	238				Symmetrical	Low	0	0	2.408	0	0
6	7	D07	A	P6	5.32	171				Asymmetrical	Low	7	0.072	2.004	0.0346821	1
6	7	D07	B	P2	6.65	210				Unknown	Low	5	0.017	2.37	0.00712191	1
6	7	D07	C	P4	5.63	253				Asymmetrical	Medium	9	0.09	3.665	0.023968	1
6	7	D07	D	P3	4.96	223				Symmetrical	Low	10	0.002	1.904	0.00104932	1
6	7	D07	E	P1	6.12	260				Unknown	Low	9	0.091	3.272	0.0270592	1
6	7	D07	F	P5	5.02	247				Unknown	Low	17	0.048	1.956	0.0239521	1
6	7	D07	G	P7	5.99	202				Symmetrical	Medium	3	0.044	2.97	0.0145985	1
7	1	C	A	P5	5.9	280				NA	NA	0	0	2.837	0	0
7	1	C	B	P7	6	268				NA	NA	0	0	2.801	0	0
7	1	C	C	P6	3.25	241				NA	NA	0	0	2.96	0	0
7	1	C	D	P3	5.87	212				NA	NA	0	0	2.193	0	0
7	1	C	E	P1	4.68	220				NA	NA	0	0	1.566	0	0
7	1	C	F	P4	6.69	173				NA	NA	0	0	3.416	0	0
7	1	C	G	P2	4.76	220				NA	NA	0	0	1.541	0	0
7	2	D28	A	P7	4.59	200				Asymmetrical	Low	2	0.001	2.398	0.00041684	1
7	2	D28	B	P6	4.76	188				Unknown	Low	0	0	1.355	0	0
7	2	D28	C	P2	5.61	180				Unknown	Low	5		1.235	0	0
7	2	D28	D	P1	6.14	213				Unknown	Low	2	0.008	2.717	0.00293578	1
7	2	D28	E	P5	5.63	275				Asymmetrical	Medium	4	0.009	2.527	0.0035489	1
7	2	D28	F	P4	6	222				Unknown	Low	0	0	2.822	0	0
7	2	D28	G	P3	4.38	179				Unknown	High	5	0.024	2.336	0.0101695	1
7	3	D04	A	P3	4.75	213				Asymmetrical	Medium	0	0	1.254	0	0
7	3	D04	B	P2	5.81	235				Unknown	Low	5	0.025	1.526	0.0161186	1
7	3	D04	C	P7	7.95	178				Symmetrical	High	11	0.079	3.617	0.0213745	1
7	3	D04	D	P4	5.32	240				Asymmetrical	Medium	7	0.014	3.55	0.00392817	1
7	3	D04	E	P1	6.12	271				Asymmetrical	Medium	4	0.029	4.573	0.00630161	1
7	3	D04	F	P5	6.02	213				Symmetrical	Medium	10	0.032	1.853	0.0169761	1
7	3	D04	G	P6	4.51	220				Asymmetrical	Medium	8	0.026	1.515	0.0168722	1
7	4	D21	A	P7	3.99	228				Asymmetrical	Low	0	0	1.766	0	0
7	4	D21	B	P6	6.27	202	2079	3.31786	0.579441	Asymmetrical	High	22	0.139	3.797	0.035315	1
7	4	D21	C	P4	5.84	220	1964.34	3.29322	0.534407	Symmetrical	Low	15	0.294	3.423	0.079096	1
7	4	D21	D	P5	3.8	191	722.053	2.85857	0.293141	Symmetrical	Medium	14	0.102	1.964	0.0493708	1
7	4	D21	E	P2	5.65	167				Unknown	Medium	3	0.003	1.752	0.0017094	1
7	4	D21	F	P1	4.81	238				Unknown	Low	19	0.099	2.661	0.0358696	1
7	4	D21	G	P3	4.49	209				Unknown	Low	7	0.039	1.884	0.0202808	1
7	5	D01	A	P7	5.42	211				Unknown	Low	13	0.043	2.121	0.0198706	1
7	5	D01	B	P4	4.82	235				Symmetrical	Low	7	0.027	1.535	0.0172855	1
7	5	D01	C	P1	5	241				Symmetrical	Low	9	0.046	1.866	0.0240586	1
7	5	D01	D	P6	5.97	230				Asymmetrical	High	0	0	2.008	0	0
7	5	D01	E	P2	4.39	180				Symmetrical	Low	6	0.019	0.833	0.0223005	1
7	5	D01	F	P3	4.9	202				Symmetrical	Medium	16	0.048	1.558	0.0298879	1
7	5	D01	G	P5	5.34	253	1888.74	3.27617	0.284205	Symmetrical	Low	24	0.113	1.924	0.0554737	1
7	6	D14	A	P2	5.34	240				Asymmetrical	Medium	1	0.001	1.422	0.000702741	1
7	6	D14	B	P6	5.82	240				Asymmetrical	High	NA	0.001	2.521	0.000396511	1
7	6	D14	C	P5	6.41	270	2904.35	3.46305	0.457428	Asymmetrical	Medium	17	0.155	2.867	0.0512905	1
7	6	D14	D	P3	4.09	235				Unknown	Low	19	0.096	1.808	0.0504202	1
7	6	D14	E	P1	5.32	217				Unknown	Low	0	0	1.925	0	0
7	6	D14	F	P7	6.3	200				Symmetrical	Low	3	0.003	2.432	0.00123203	1
7	6	D14	G	P4	5.11	265	1811.57	3.25806	0.48373	Asymmetrical	Medium	21	0.112	3.046	0.0354655	1
7	7	D07	A	P1	6.86	208				Asymmetrical	Medium	1	0	4.002	0	0
7	7	D07	B	P2	6.35	200				Asymmetrical	Low	0	0	2.405	0	0
7	7	D07	C	P6	5.35	244				Asymmetrical	High	2	0.001	2.666	0.000374953	1
7	7	D07	D	P3	5.24	225				Symmetrical	Medium	34	0.084	1.78	0.0450644	1
7	7	D07	E	P4	5.03	183				Unknown	High	9	0.086	1.947	0.042302	1
7	7	D07	F	P7	6.44	251	2725.3	3.43541	0.423246	Symmetrical	Low	4	0.27	2.65	0.0924658	1
7	7	D07	G	P5	5.45	220				Unknown	Medium	17	0.044	1.851	0.023219	1
8	1	D28	A	P6	5.56	194	1570.07	3.19592	0.256477	Asymmetrical	Medium	8	0.102	1.805	0.0534872	1
8	1	D28	B	P4	5.56	267				Symmetrical	Low	1	0.013	2.615	0.00494673	1
8	1	D28	C	P7	6.87	254				Symmetrical	Medium	0	0	2.552	0	0
8	1	D28	D	P3	4.55	217				Asymmetrical	Low	4	0.028	1.107	0.0246696	1
8	1	D28	E	P1	6.37	191				Asymmetrical	Low	8	0.038	2.314	0.0161565	1
8	1	D28	F	P2	5.03	210				Symmetrical	Low	0	0	0.907	0	0
8	1	D28	G	P5	4.83	252				Symmetrical	Medium	12	0.047	2.633	0.0175373	1
8	2	D01	A	P7	5.5	239				Symmetrical	Low	12	0.052	1.951	0.0259611	1
8	2	D01	B	P4	5.7	198				Symmetrical	Low	25	0.096	1.96	0.0466926	1
8	2	D01	C	P2	5.59	200				Unknown	Medium	0	0	1.393	0	0
8	2	D01	D	P6	6.33	196				Unknown	Medium	12	0.034	2.203	0.0151989	1
8	2	D01	E	P3	4.66	239				Unknown	Medium	18	0.053	1.475	0.0346859	1
8	2	D01	F	P1	5.34	248				Symmetrical	Low	1	0.003	1.825	0.00164114	1
8	2	D01	G	P5	5.27	213	1548.71	3.18997	0.325926	Unknown	Low	31	0.106	2.118	0.0476619	1
8	3	C	A	P6	6.95	217				NA	NA	0	0	3.816	0	0
8	3	C	B	P5	5.24	244				NA	NA	0	0	1.764	0	0
8	3	C	C	P4	6.21	221				NA	NA	0	0	3.029	0	0
8	3	C	D	P2	6.35	230				NA	NA	0	0	2.901	0	0
8	3	C	E	P3	4.28	190				NA	NA	0	0	1.131	0	0
8	3	C	F	P7	4.44	190				NA	NA	0	0	1.125	0	0
8	3	C	G	P1	6.29	240				NA	NA	0	0	2.566	0	0
8	4	D07	A	P5	9.81	230	5794.75	3.76303	0.786609	Unknown	High	43	0.201	6.118	0.0318088	1
8	4	D07	B	P7	6.43	209				Asymmetrical	High	10	0.024	4.009	0.00595091	1
8	4	D07	C	P6	6.2	210				Symmetrical	Low	0	0	2.295	0	0
8	4	D07	D	P3	4.57	185				Unknown	Low	16	0.054	0.968	0.0528376	1
8	4	D07	E	P4	5.88	233				Symmetrical	Medium	2	0.009	2.811	0.00319149	1
8	4	D07	F	P1	7.01	220				Asymmetrical	Medium	1	0.004	2.572	0.0015528	1
8	4	D07	G	P2	5.31	235				Unknown	Low	0	0	1.051	0	0
8	5	D04	A	P1	5.71	203				Symmetrical	Low	6	0.027	2.069	0.0128817	1
8	5	D04	B	P6	4.56	200				Asymmetrical	Low	6	0.023	1.401	0.0161517	1
8	5	D04	C	P5	5.36	237				Unknown	Medium	11	0.051	2.773	0.0180595	1
8	5	D04	D	P7	5.51	241				Asymmetrical	Low	NA	0.022	3.528	0.00619718	1
8	5	D04	E	P3	4.21	194				Unknown	Low	19	0.018	1.003	0.0176298	1
8	5	D04	F	P2	6.23	221				Asymmetrical	High	0	0	2.71	0	0
8	5	D04	G	P4	5.4	228				Asymmetrical	Medium	4	0.008	2.899	0.00275198	1
8	6	D14	A	P4	5.02	202				Symmetrical	Low	8	0.09	1.546	0.0550122	1
8	6	D14	B	P2	4.45	212				Unknown	Low	0	0	0.958	0	0
8	6	D14	C	P3	4.29	202				Unknown	Low	6	0.018	1.231	0.0144115	1
8	6	D14	D	P5	4.88	258				Symmetrical	Medium	12	0.058	1.349	0.0412225	1
8	6	D14	E	P7	5.05	207	1382.04	3.14052	0.223236	Asymmetrical	Medium	16	0.102	1.672	0.0574972	1
8	6	D14	F	P6	6.08	236	2283.96	3.35869	0.431685	Unknown	Low	15	0.18	2.702	0.0624566	1
8	6	D14	G	P1	5.2	241				Unknown	Low	18	0.086	1.832	0.0448384	1
8	7	D21	A	P1	6.08	237				Unknown	Low	0	0	1.973	0	0
8	7	D21	B	P7	5.83	258				Symmetrical	High	NA	0.013	4.608	0.00281324	1
8	7	D21	C	P6	5.01	229	1504.8	3.17748	0.488127	Unknown	Low	15	0.11	3.077	0.0345152	1
8	7	D21	D	P3	4.6	248	1373.84	3.13794	0.329194	Asymmetrical	Medium	11	0.15	2.134	0.0656743	1
8	7	D21	E	P5	5.38	213	1614.03	3.20791	0.396722	Symmetrical	Medium	14	0.128	2.493	0.0488363	1
8	7	D21	F	P4	6.32	230				Unknown	Medium	1	0.003	3.432	0.000873362	1
8	7	D21	G	P2	5.72	165				Symmetrical	Low	0	0	1.383	0	0
9	1	D14	A	P2	6.44	195				Asymmetrical	High	8	0.057	2.658	0.0209945	1
9	1	D14	B	P6	6.08	238				Unknown	Medium	2	0.001	1.972	0.000506842	1
9	1	D14	C	P5	5.49	252	1988.45	3.29851	0.457125	Unknown	Low	NA	0.134	2.865	0.0446816	1
9	1	D14	D	P1	5.3	223				Unknown	Low	0	0	2.881	0	0
9	1	D14	E	P3	4.55	238				Unknown	Medium	11		2.477	0	0
9	1	D14	F	P7	6.86	195				Symmetrical	High	2	0.021	1.781	0.0116537	1
9	1	D14	G	P4	4.35	238				Asymmetrical	Low	4	0.009	3.111	0.00288462	1
9	2	D21	A	P4	5.53	192	1537.16	3.18672	0.398287	Unknown	Medium	12	0.106	2.502	0.0406442	1
9	2	D21	B	P6	5.18	180				Unknown	Low	3	0.017	1.841	0.00914962	1
9	2	D21	C	P1	7.18	248				Symmetrical	Medium	0	0	4.198	0	0
9	2	D21	D	P7	5.68	250				Unknown	Low	0	0	2.218	0	0
9	2	D21	E	P2	5.92	197				Unknown	High	0	0	3.848	0	0
9	2	D21	F	P3	4.74	247	1452.85	3.16222	0.296665	Symmetrical	Low	12	0.146	1.98	0.0686736	1
9	2	D21	G	P5	6.55	225				Symmetrical	Low	9	0.004	2.121	0.00188235	1
9	3	D04	A	P3	5.14	228				Asymmetrical	Medium	18	0.045	2.065	0.021327	1
9	3	D04	B	P5	4.47	213				Symmetrical	Medium	23	0.013	2.148	0.00601573	1
9	3	D04	C	P2	5.93	166				Asymmetrical	Medium	6	0.012	2.513	0.00475248	1
9	3	D04	D	P4	5.65	252				Asymmetrical	Medium	3	0.006	4.269	0.00140351	1
9	3	D04	E	P7	6.85	203				Unknown	Low	0	0	1.383	0	0
9	3	D04	F	P6	5.16	190				Unknown	Low	0	0	1.472	0	0
9	3	D04	G	P1	5.6	196				Unknown	Low	0	0	1.696	0	0
9	4	D28	A	P4	5.16	209	1456.85	3.16341	0.296446	Asymmetrical	Low	16	0.128	1.979	0.0607499	1
9	4	D28	B	P6	6.67	239				Unknown	High	4	0.073	3.522	0.020306	1
9	4	D28	C	P5	4.42	240				Symmetrical	Low	6	0.017	1.731	0.0097254	1
9	4	D28	D	P1	5.74	231				Unknown	Medium	0	0	2.275	0	0
9	4	D28	E	P7	5.61	180				Unknown	Medium	5	0.033	2.518	0.0129361	1
9	4	D28	F	P3	5.11	261	1784.23	3.25145	0.436799	Symmetrical	Low	24	0.166	2.734	0.0572414	1
9	4	D28	G	P2	5.12	190				Asymmetrical	Low	0	0	1.563	0	0
9	5	C	A	P2	3.5	239				NA	NA	0	0	1.11	0	0
9	5	C	B	P7	7.55	248				NA	NA	0	0	5.094	0	0
9	5	C	C	P1	5.78	219				NA	NA	0	0	1.867	0	0
9	5	C	D	P3	3.58	200				NA	NA	0	0	0.833	0	0
9	5	C	E	P5	4.28	234				NA	NA	0	0	1.843	0	0
9	5	C	F	P4	5.4	218				NA	NA	0	0	2.336	0	0
9	5	C	G	P6	6.25	240				NA	NA	0	0	2.295	0	0
9	6	D07	A	P5	5.52	194				Symmetrical	Low	25	0.075	1.726	0.0416435	1
9	6	D07	B	P1	6.66	223				Symmetrical	Low	15	0.094	2.302	0.0392321	1
9	6	D07	C	P3	4.84	224				Asymmetrical	High	9	0.001	2.517	0.000397141	1
9	6	D07	D	P2	5.48	201				Asymmetrical	Medium	0	0	1.324	0	0
9	6	D07	E	P7	5.62	260				Symmetrical	Low	0	0	2.05	0	0
9	6	D07	F	P6	5.04	224				Unknown	Low	16	0.047	1.666	0.0274372	1
9	6	D07	G	P4	5.18	212				Symmetrical	Low	6	0.044	1.507	0.0283688	1
9	7	D01	A	P5	4.86	218				Symmetrical	Medium	17	0.067	1.793	0.0360215	1
9	7	D01	B	P6	6.08	200				Symmetrical	Low	1	0.002	2.455	0.000814001	1
9	7	D01	C	P4	5.37	223				Symmetrical	Low	11	0.044	1.701	0.0252149	1
9	7	D01	D	P1	5.71	220				Unknown	Low	0	0	1.413	0	0
9	7	D01	E	P7	7.4	232				Symmetrical	Medium	8	0.087	3.401	0.0249427	1
9	7	D01	F	P3	4.77	237				Symmetrical	Low	8	0.013	1.6	0.00805952	1
9	7	D01	G	P2	4.42	220				Asymmetrical	Low	6	0.027	2.383	0.0112033	1
10	1	D21	A	P2	4.17	195				Asymmetrical	Low	2	0.002	1.041	0.00191755	1
10	1	D21	B	P7	6.12	253				Unknown	Low	11	0.045	2.375	0.018595	1
10	1	D21	C	P4	6.66	210	2438.58	3.38714	0.649237	Unknown	High	17	0.309	4.459	0.064807	1
10	1	D21	D	P1	5.82	235				Symmetrical	Low	0	0	2.407	0	0
10	1	D21	E	P5	4.61	201	1118.32	3.04857	0.329805	Symmetrical	Low	13	0.133	2.137	0.0585903	1
10	1	D21	F	P3	5.92	246	2257.08	3.35355	0.515211	Unknown	High	15	0.109	3.275	0.0322104	1
10	1	D21	G	P6	5.48	240				Asymmetrical	High	1	0.002	4.529	0.000441404	1
10	2	D04	A	P6	5.13	229				Unknown	Medium	19	0.038	2.602	0.0143939	1
10	2	D04	B	P2	4.58	202				Unknown	Medium	12	0.033	1.122	0.0285714	1
10	2	D04	C	P7	6.99	267				Asymmetrical	High	NA	0.099	5.034	0.019287	1
10	2	D04	D	P3	5.41	221				Unknown	Low	19	0.056	1.827	0.0297398	1
10	2	D04	E	P5	4.83	222				Unknown	High	37	0.087	3	0.0281827	1
10	2	D04	F	P1	7.3	219				Unknown	Low	4	0.016	0.831	0.0188902	1
10	2	D04	G	P4	5.76	170				Asymmetrical	High	2	0.03	2.919	0.0101729	1
10	3	D07	A	P1	5.76	241				Symmetrical	Low	5	0.028	2.195	0.0125956	1
10	3	D07	B	P5	4.92	204				Asymmetrical	Medium	13	0.061	2.405	0.0247364	1
10	3	D07	C	P4	6.1	192				Unknown	Medium	8	0.079	3.925	0.0197303	1
10	3	D07	D	P6	4.12	171				Unknown	Low	2	0.003	1.069	0.00279851	1
10	3	D07	E	P2	6.25	185				Asymmetrical	Medium	0	0	2.011	0	0
10	3	D07	F	P3	4.77	236				Unknown	Medium	17	0.04	1.665	0.0234604	1
10	3	D07	G	P7	7.4	244				Unknown	Medium	0	0	4.348	0	0
10	4	C	A	P5	5.98	242				NA	NA	0	0	2.64	0	0
10	4	C	B	P4	6.58	212				NA	NA	2	0	3.947	0	0
10	4	C	C	P7	7.07	237				NA	NA	0	0	2.916	0	0
10	4	C	D	P1	7.6	243				NA	NA	0	0	2.908	0	0
10	4	C	E	P3	4.52	210				NA	NA	0	0	1.1	0	0
10	4	C	F	P6	4.68	168				NA	NA	0	0	0.772	0	0
10	4	C	G	P2	4.17	149				NA	NA	0	0	0.529	0	0
10	5	D28	A	P6	5.13	208				Asymmetrical	Low	2	0.002	1.655	0.001207	1
10	5	D28	B	P5	4.78	243				Asymmetrical	Low	0	0	2.11	0	0
10	5	D28	C	P1	7.14	263				Asymmetrical	Medium	0	0	3.724	0	0
10	5	D28	D	P2	5.66	169				Asymmetrical	Low	3	0.001	1.317	0.000758725	1
10	5	D28	E	P4	5.77	249				Unknown	Low	19	0.049	2.83	0.0170198	1
10	5	D28	F	P7	5.07	182				Unknown	Low	9	0.038	1.497	0.0247557	1
10	5	D28	G	P3	4.47	234				Asymmetrical	Low	0	0	1.063	0	0
10	6	D14	A	P7	5.97	232				Unknown	Low	3	0.013	3.619	0.0035793	1
10	6	D14	B	P4	5.24	185				Symmetrical	Low	9	0.076	1.435	0.0502978	1
10	6	D14	C	P1	6.65	249				Asymmetrical	Low	0	0	2.654	0	0
10	6	D14	D	P5	4.84	258	1582.26	3.19928	0.397071	Symmetrical	Medium	34	0.144	2.495	0.0545661	1
10	6	D14	E	P6	5.29	183				Symmetrical	Low	0	0	1.799	0	0
10	6	D14	F	P2	4.48	232				Asymmetrical	High	0	0	2.359	0	0
10	6	D14	G	P3	5.95	181				Asymmetrical	Medium	0	0	1.84	0	0
10	7	D01	A	P1	5.96	220				Unknown	Low	8	0.045	2.601	0.0170068	1
10	7	D01	B	P3	4.35	206				Asymmetrical	Medium	12	0.037	1.234	0.0291109	1
10	7	D01	C	P4	6.59	276				Unknown	Low	9	0.042	2.314	0.0178268	1
10	7	D01	D	P7	5.74	215				Unknown	Medium	11	0.044	1.706	0.0251429	1
10	7	D01	E	P2	4.25	183				Unknown	Low	4	0.016	0.831	0.0188902	1
10	7	D01	F	P5	5.51	243				Unknown	Low	14	0.05	1.851	0.0263019	1
10	7	D01	G	P6	5.08	228				Unknown	Low	5	0.005	1.688	0.00295334	1
11	1	C	A	P5	4.44	241				Symmetrical	Low	0	0	1.763	0	0
11	1	C	B	P4	5.58	221				NA	NA	0	0	1.924	0	0
11	1	C	C	P1	6.38	228				Symmetrical	Low	0	0	1.704	0	0
11	1	C	D	P7	5.08	260				Unknown	Medium	0	0	2.078	0	0
11	1	C	E	P2	4.01	171				NA	NA	0	0	0.907	0	0
11	1	C	F	P3	3.97	189				Asymmetrical	Medium	0	0	1.203	0	0
11	1	C	G	P6	7.71	267				Asymmetrical	High	0	0	4.092	0	0
11	2	D14	A	P1	6.13	205				Symmetrical	Low	3	0.03	1.671	0.0176367	1
11	2	D14	B	P5	5.63	223				Symmetrical	Medium	16	0.094	2.624	0.0345843	1
11	2	D14	C	P3	5.34	206				Unknown	Low	9	0.056	1.779	0.0305177	1
11	2	D14	D	P4	5.8	194				Unknown	Low	0	0	1.341	0	0
11	2	D14	E	P2	4.65	184				Asymmetrical	Low	0	0	1.108	0	0
11	2	D14	F	P6	5.78	210				Symmetrical	Low	0	0	2.004	0	0
11	2	D14	G	P7	6.69	213				Unknown	High	20	0.092	3.649	0.0245924	1
11	3	D01	A	P3	5.69	218				Symmetrical	High	21	0.081	3.456	0.0229008	1
11	3	D01	B	P4	5.79	241				Unknown	High	18	0.065	3.197	0.0199264	1
11	3	D01	C	P1	7.81	234				Asymmetrical	High	5	0.015	4.49	0.00332963	1
11	3	D01	D	P2	6.01	220				Asymmetrical	Medium	6	0.017	2.299	0.00734024	1
11	3	D01	E	P7	5.12	215				Unknown	Low	6	0.024	1.402	0.0168303	1
11	3	D01	F	P6	4.89	238				Unknown	Low	NA	0.043	1.577	0.0265432	1
11	3	D01	G	P5	3.94	211				Unknown	Medium	22	0.03	1.392	0.021097	1
11	4	D04	A	P3	4.17	230				Unknown	Medium	21	0.036	1.528	0.0230179	1
11	4	D04	B	P6	4.24	185				Unknown	Low	6	0.022	3.233	0.00675883	1
11	4	D04	C	P7	5.49	180				Unknown	Medium	5	0.018	2.872	0.00622837	1
11	4	D04	D	P5	5.01	238				Unknown	Medium	22	0.037	1.766	0.0205214	1
11	4	D04	E	P2	5.49	208				Symmetrical	Low	0	0	1.013	0	0
11	4	D04	F	P4	4.48	248				Unknown	Medium	12	0.081	3.619	0.0218919	1
11	4	D04	G	P1	6.79	212				Unknown	Medium	3	0.007	3.562	0.00196133	1
11	5	D21	A	P3	5.03	234				Unknown	Low	0	0	1.683	0	0
11	5	D21	B	P1	7.63	249				Symmetrical	Low	0	0	3.183	0	0
11	5	D21	C	P2	5.99	221				Unknown	Medium	0	0	3.204	0	0
11	5	D21	D	P6	4.82	217	1319.84	3.12052	0.239299	Asymmetrical	Medium	14	0.126	1.735	0.0677055	1
11	5	D21	E	P4	4.98	280				Unknown	Low	7	0.09	2.559	0.0339751	1
11	5	D21	F	P5	4.65	195				Symmetrical	Low	4	0.033	2.217	0.0146667	1
11	5	D21	G	P7	5.18	201				Symmetrical	Low	NA	0.023	1.951	0.0116515	1
11	6	D28	A	P4	7.22	204				Asymmetrical	High	15	0.059	4.872	0.0119651	1
11	6	D28	B	P2	4.97	182				Asymmetrical	Low	5	0.009	1.798	0.00498063	1
11	6	D28	C	P6	4.83	205				Unknown	Low	3	0.025	2.759	0.00897989	1
11	6	D28	D	P3	5.02	251				Unknown	Medium	2	0	2.786	0	0
11	6	D28	E	P5	4.99	200				Symmetrical	Medium	3	0.008	3.553	0.00224656	1
11	6	D28	F	P1	6.24	215				Unknown	Low	3	0.003	2.424	0.00123609	1
11	6	D28	G	P7	5.19	212				Symmetrical	Low	0	0	1.386	0	0
11	7	D07	A	P1	6.58	234				Symmetrical	Low	7	0.037	3.677	0.0099623	1
11	7	D07	B	P5	5.49	220	1735.95	3.23954	0.345178	Symmetrical	Low	9	0.108	2.214	0.0465116	1
11	7	D07	C	P4	5.25	217				Asymmetrical	Low	13	0.051	2.855	0.0175499	1
11	7	D07	D	P7	5.52	204				Unknown	Low	3	0.018	1.686	0.0105634	1
11	7	D07	E	P3	4.52	240				Symmetrical	Medium	NA	0.05	1.774	0.0274123	1
11	7	D07	F	P2	5.05	180				Asymmetrical	High	0	0	1.854	0	0
11	7	D07	G	P6	4.43	195	1001.87	3.00081	0.242541	Asymmetrical	Medium	33	0.108	1.748	0.0581897	1
12	1	D07	A	P3	3.81	208				Symmetrical	Low	39	0.04	1.193	0.0324412	1
12	1	D07	B	P1	5.58	261				Asymmetrical	High	13	0.063	2.208	0.0277411	1
12	1	D07	C	P4	6.06	231	2220.88	3.34653	0.547159	Symmetrical	Medium	21	0.164	3.525	0.0444565	1
12	1	D07	D	P5	4.19	232				Unknown	Low	15	0.071	1.735	0.0393134	1
12	1	D07	E	P2	3.86	181				Asymmetrical	Low	0	0	0.954	0	0
12	1	D07	F	P6	5	231				Asymmetrical	Low	6	0.011	1.345	0.00811209	1
12	1	D07	G	P7	5.7	192				Unknown	Low	8	0.034	1.001	0.0328502	1
12	2	D04	A	P3	4.66	223				Unknown	Medium	25	0.063	2.691	0.0228758	1
12	2	D04	B	P7	5.22	208				Unknown	Medium	11	0.045	1.422	0.0306748	1
12	2	D04	C	P1	6.73	206				Asymmetrical	Medium	2	0.009	3.431	0.00261628	1
12	2	D04	D	P2	5.13	220				Asymmetrical	Medium	11	0.026	1.89	0.0135699	1
12	2	D04	E	P4	5.53	252				Symmetrical	Low	22	0.057	2.709	0.0206074	1
12	2	D04	F	P5	4.46	231				Unknown	Low	5	0.029	1.537	0.0185185	1
12	2	D04	G	P6	5.22	223				Unknown	Medium	8	0.071	1.7	0.0400903	1
12	3	D14	A	P6	5.16	151				Asymmetrical	Low	3	0.019	1.195	0.0156507	1
12	3	D14	B	P7	4.78	208				Unknown	Low	1	0.004	1.485	0.00268637	1
12	3	D14	C	P5	4.61	210	1168.4	3.06759	0.148603	Symmetrical	Low	15	0.104	1.408	0.0687831	1
12	3	D14	D	P4	6.29	233				Symmetrical	Low	14	0.051	1.963	0.0253227	1
12	3	D14	E	P1	5.96	216				Unknown	Low	0	0	2.285	0	0
12	3	D14	F	P3	4.73	180				Unknown	Medium	3	0.026	1.823	0.0140617	1
12	3	D14	G	P2	6.04	160				Asymmetrical	Medium	0	0	1.432	0	0
12	4	D21	A	P2	5.23	200				Asymmetrical	High	4	0.022	2.881	0.00757837	1
12	4	D21	B	P3	4.13	261				Asymmetrical	Low	1	0.001	1.302	0.00076746	1
12	4	D21	C	P7	5.81	210				Symmetrical	High	15	0.061	2.869	0.0208191	1
12	4	D21	D	P5	5.26	208	1506.62	3.178	0.310481	Unknown	Low	41	0.17	2.044	0.0767841	1
12	4	D21	E	P4	7.27	197	2725.86	3.4355	0.9174	Asymmetrical	High	NA	0.19	8.268	0.0224639	1
12	4	D21	F	P6	5.16	213				Symmetrical	Low	1	0.001	1.871	0.000534188	1
12	4	D21	G	P1	6.11	202				Asymmetrical	Medium	0	0	3.03	0	0
12	5	C	A	P5	4.01	217				Symmetrical	Medium	0	0	2.211	0	0
12	5	C	B	P1	5.62	214				Unknown	Low	0	0	1.943	0	0
12	5	C	C	P7	4.02	199				Unknown	Low	0	0	1.533	0	0
12	5	C	D	P6	6.46	190				Unknown	High	0	0	4.413	0	0
12	5	C	E	P3	4.43	226				Unknown	Medium	0	0	1.693	0	0
12	5	C	F	P2	6.47	193				Symmetrical	Medium	0	0	1.813	0	0
12	5	C	G	P4	4.46	261				Symmetrical	Low	0	0	3.116	0	0
12	6	D28	A	P4	6.2	240	2415.26	3.38296	0.502564	Symmetrical	Low	17	0.166	3.181	0.0495967	1
12	6	D28	B	P1	5.84	241				Symmetrical	Low	0	0	2.161	0	0
12	6	D28	C	P6	5.99	203				Symmetrical	Medium	0	0	3.395	0	0
12	6	D28	D	P7	5.09	235				Symmetrical	Low	0	0	1.687	0	0
12	6	D28	E	P5	4.15	234				Asymmetrical	Medium	8	0.06	1.967	0.0296004	1
12	6	D28	F	P3	3.68	221				Unknown	Low	23	0.078	2.518	0.0300462	1
12	6	D28	G	P2	4.93	220				Unknown	Medium	16	0.047	2.436	0.0189287	1
12	7	D01	A	P4	5.38	228				Symmetrical	Low	12	0.034	1.644	0.0202622	1
12	7	D01	B	P2	5.18	216				Unknown	Medium	7	0.03	1.485	0.019802	1
12	7	D01	C	P1	4.75	228				Symmetrical	Low	7	0.033	2.855	0.0114266	1
12	7	D01	D	P5	4.33	222				Unknown	Medium	19	0.032	1.757	0.0178871	1
12	7	D01	E	P7	4.69	178				Symmetrical	Low	0	0	1.075	0	0
12	7	D01	F	P3	4.58	193				Unknown	Medium	25	0.052	1.595	0.0315726	1
12	7	D01	G	P6	4.19	246				Unknown	High	18	0.055	2.511	0.0214341	1

## Sheet: Templogger
Timestamp	Temperature	RelativeHumidity	DewPoint_dC
2020-07-28 17:36:00	22.7	57.2	13.8
2020-07-28 17:51:00	22.8	65.4	16
2020-07-28 18:06:00	22.9	57.3	14
2020-07-28 18:21:00	22.9	57.4	14
2020-07-28 18:36:00	23.2	56.8	14.2
2020-07-28 18:51:00	23.2	59.5	14.9
2020-07-28 19:06:00	23.1	61.1	15.2
2020-07-28 19:21:00	22.9	61.8	15.2
2020-07-28 19:36:00	22.8	62.5	15.3
2020-07-28 19:51:00	22.8	62.4	15.2
2020-07-28 20:06:00	22.7	63.2	15.3
2020-07-28 20:21:00	22.6	63.4	15.3
2020-07-28 20:36:00	22.6	63.8	15.4
2020-07-28 20:51:00	22.6	63.5	15.3
2020-07-28 21:06:00	22.5	64	15.3
2020-07-28 21:21:00	22.5	64.7	15.5
2020-07-28 21:36:00	22.4	64.4	15.4
2020-07-28 21:51:00	22.4	64.5	15.4
2020-07-28 22:06:00	22.3	64.8	15.4
2020-07-28 22:21:00	22.2	64.8	15.3
2020-07-28 22:36:00	22.2	64.5	15.2
2020-07-28 22:51:00	22.1	64.3	15
2020-07-28 23:06:00	22.1	64.7	15.1
2020-07-28 23:21:00	22.1	64.3	15
2020-07-28 23:36:00	22	64.4	15
2020-07-28 23:51:00	21.9	64.2	14.8
2020-07-29 00:06:00	21.9	63.4	14.6
2020-07-29 00:21:00	21.8	63	14.4
2020-07-29 00:36:00	21.8	62.9	14.4
2020-07-29 00:51:00	21.7	62.6	14.2
2020-07-29 01:06:00	21.7	62.8	14.3
2020-07-29 01:21:00	21.6	62.5	14.1
2020-07-29 01:36:00	21.6	61.6	13.9
2020-07-29 01:51:00	21.5	61.5	13.8
2020-07-29 02:06:00	21.5	61.1	13.7
2020-07-29 02:21:00	21.4	60.7	13.5
2020-07-29 02:36:00	21.4	60.3	13.4
2020-07-29 02:51:00	21.3	60.2	13.3
2020-07-29 03:06:00	21.3	60.1	13.2
2020-07-29 03:21:00	21.2	59.9	13.1
2020-07-29 03:36:00	21.2	59.8	13.1
2020-07-29 03:51:00	21.2	60.1	13.1
2020-07-29 04:06:00	21.2	60	13.1
2020-07-29 04:21:00	21.1	60	13
2020-07-29 04:36:00	21.1	60.2	13.1
2020-07-29 04:51:00	21	60.4	13
2020-07-29 05:06:00	21	60.2	13
2020-07-29 05:21:00	21	60.5	13.1
2020-07-29 05:36:00	20.9	60.5	13
2020-07-29 05:51:00	20.9	60.7	13
2020-07-29 06:06:00	20.9	60.6	13
2020-07-29 06:21:00	20.8	60.7	12.9
2020-07-29 06:36:00	20.8	60.7	12.9
2020-07-29 06:51:00	20.7	60.7	12.8
2020-07-29 07:06:00	20.7	60.7	12.8
2020-07-29 07:21:00	20.7	60.9	12.9
2020-07-29 07:36:00	20.7	60.6	12.8
2020-07-29 07:51:00	20.7	60.5	12.8
2020-07-29 08:06:00	20.9	59.8	12.8
2020-07-29 08:21:00	21.1	58.7	12.7
2020-07-29 08:36:00	21.4	57.8	12.7
2020-07-29 08:51:00	21.8	56.8	12.8
2020-07-29 09:06:00	22.4	55.5	13.1
2020-07-29 09:21:00	23.2	53.9	13.3
2020-07-29 09:36:00	24.3	51.2	13.6
2020-07-29 09:51:00	26.1	47.1	13.9
2020-07-29 10:06:00	27.3	44.4	14.1
2020-07-29 10:21:00	28.2	42.4	14.2
2020-07-29 10:36:00	28.4	41.8	14.2
2020-07-29 10:51:00	29	40.8	14.3
2020-07-29 11:06:00	29.9	39.1	14.5
2020-07-29 11:21:00	30.8	37.7	14.7
2020-07-29 11:36:00	31.7	36.4	15
2020-07-29 11:51:00	32.4	35.4	15.2
2020-07-29 12:06:00	32.5	35.2	15.1
2020-07-29 12:21:00	31.9	35.8	14.9
2020-07-29 12:36:00	32	35.7	14.9
2020-07-29 12:51:00	32.9	34.7	15.3
2020-07-29 13:06:00	33.8	33.6	15.6
2020-07-29 13:21:00	34.1	33.2	15.6
2020-07-29 13:36:00	33.2	34.3	15.4
2020-07-29 13:51:00	31.3	36.4	14.6
2020-07-29 14:06:00	29.4	39.1	14
2020-07-29 14:21:00	28	41.1	13.6
2020-07-29 14:36:00	27.2	42.2	13.2
2020-07-29 14:51:00	26.7	42.5	12.9
2020-07-29 15:06:00	26.4	43	12.8
2020-07-29 15:21:00	26.1	43.5	12.7
2020-07-29 15:36:00	25.9	44.2	12.8
2020-07-29 15:51:00	25.8	44.6	12.8
2020-07-29 16:06:00	25.7	44.7	12.8
2020-07-29 16:21:00	25.6	45.3	12.9
2020-07-29 16:36:00	25.3	45.8	12.8
2020-07-29 16:51:00	25.1	46.2	12.7
2020-07-29 17:06:00	24.8	46.8	12.7
2020-07-29 17:21:00	24.5	47.2	12.5
2020-07-29 17:36:00	24.2	47.9	12.5
2020-07-29 17:51:00	23.8	48.5	12.3
2020-07-29 18:06:00	23.5	49.3	12.3
2020-07-29 18:21:00	23.3	49.8	12.2
2020-07-29 18:36:00	23.1	50.3	12.2
2020-07-29 18:51:00	23	50.8	12.3
2020-07-29 19:06:00	22.9	50.9	12.2
2020-07-29 19:21:00	22.8	51.2	12.2
2020-07-29 19:36:00	22.7	51.5	12.2
2020-07-29 19:51:00	22.6	51.6	12.1
2020-07-29 20:06:00	22.5	51.6	12
2020-07-29 20:21:00	22.4	51.8	12
2020-07-29 20:36:00	22.4	51.8	12
2020-07-29 20:51:00	22.3	51.8	11.9
2020-07-29 21:06:00	22.2	51.8	11.8
2020-07-29 21:21:00	22.2	52.1	11.9
2020-07-29 21:36:00	22.1	52.1	11.8
2020-07-29 21:51:00	22	52.1	11.7
2020-07-29 22:06:00	21.9	52.1	11.6
2020-07-29 22:21:00	21.9	52.1	11.6
2020-07-29 22:36:00	21.8	51.9	11.5
2020-07-29 22:51:00	21.8	52	11.5
2020-07-29 23:06:00	21.7	51.7	11.3
2020-07-29 23:21:00	21.7	51.6	11.3
2020-07-29 23:36:00	21.7	51.6	11.3
2020-07-29 23:51:00	21.6	51.5	11.2
2020-07-30 00:06:00	21.6	51.5	11.2
2020-07-30 00:21:00	21.5	51.5	11.1
2020-07-30 00:36:00	21.5	51.4	11.1
2020-07-30 00:51:00	21.4	51.2	10.9
2020-07-30 01:06:00	21.4	51	10.8
2020-07-30 01:21:00	21.3	51	10.7
2020-07-30 01:36:00	21.3	51.1	10.8
2020-07-30 01:51:00	21.3	51.5	10.9
2020-07-30 02:06:00	21.3	52.1	11.1
2020-07-30 02:21:00	21.3	52.5	11.2
2020-07-30 02:36:00	21.2	52.7	11.2
2020-07-30 02:51:00	21.2	52.9	11.2
2020-07-30 03:06:00	21.2	52.9	11.2
2020-07-30 03:21:00	21.2	53	11.2
2020-07-30 03:36:00	21.1	53.2	11.2
2020-07-30 03:51:00	21.1	53.4	11.3
2020-07-30 04:06:00	21	53.7	11.2
2020-07-30 04:21:00	21	54	11.3
2020-07-30 04:36:00	21	54.4	11.4
2020-07-30 04:51:00	20.9	54.4	11.4
2020-07-30 05:06:00	20.9	54.7	11.4
2020-07-30 05:21:00	20.8	54.7	11.3
2020-07-30 05:36:00	20.8	54.7	11.3
2020-07-30 05:51:00	20.7	54.8	11.3
2020-07-30 06:06:00	20.7	54.9	11.3
2020-07-30 06:21:00	20.7	55.2	11.4
2020-07-30 06:36:00	20.7	55.3	11.4
2020-07-30 06:51:00	20.7	55.6	11.5
2020-07-30 07:06:00	20.6	55.7	11.4
2020-07-30 07:21:00	20.6	56	11.5
2020-07-30 07:36:00	20.6	56.3	11.6
2020-07-30 07:51:00	20.7	56.4	11.7
2020-07-30 08:06:00	20.8	55.9	11.7
2020-07-30 08:21:00	21	55.6	11.8
2020-07-30 08:36:00	21.3	54.9	11.9
2020-07-30 08:51:00	21.5	54.4	11.9
2020-07-30 09:06:00	22	53.5	12.1
2020-07-30 09:21:00	22.7	52	12.3
2020-07-30 09:36:00	24.2	48.8	12.7
2020-07-30 09:51:00	25.9	45.2	13.1
2020-07-30 10:06:00	27	43.1	13.4
2020-07-30 10:21:00	27.7	41.7	13.5
2020-07-30 10:36:00	28.2	40.5	13.5
2020-07-30 10:51:00	28.9	39.9	13.9
2020-07-30 11:06:00	29.8	38.4	14.1
2020-07-30 11:21:00	30.3	37.7	14.3
2020-07-30 11:36:00	30.7	37.3	14.5
2020-07-30 11:51:00	30	38.1	14.2
2020-07-30 12:06:00	27.7	42.1	13.7
2020-07-30 12:21:00	27.9	42.2	13.9
2020-07-30 12:36:00	29.7	39.6	14.5
2020-07-30 12:51:00	31.7	36.9	15.2
2020-07-30 13:06:00	32.7	35.5	15.5
2020-07-30 13:21:00	31	37	14.6
2020-07-30 13:36:00	28.5	41	14
2020-07-30 13:51:00	27.9	42.2	13.9
2020-07-30 14:06:00	27.3	43.2	13.7
2020-07-30 14:21:00	26.7	44.4	13.6
2020-07-30 14:36:00	26.3	45.3	13.5
2020-07-30 14:51:00	26.1	45.9	13.5
2020-07-30 15:06:00	26	46.5	13.6
2020-07-30 15:21:00	25.9	47.1	13.8
2020-07-30 15:36:00	25.7	47.5	13.7
2020-07-30 15:51:00	25.5	48.2	13.7
2020-07-30 16:06:00	25.3	48.7	13.7
2020-07-30 16:21:00	25.1	49.5	13.8
2020-07-30 16:36:00	24.8	50.2	13.7
2020-07-30 16:51:00	24.6	50.8	13.7
2020-07-30 17:06:00	24.3	51.5	13.7
2020-07-30 17:21:00	24	52.2	13.6
2020-07-30 17:36:00	23.8	52.6	13.5
2020-07-30 17:51:00	23.5	53.2	13.4
2020-07-30 18:06:00	23.2	53.7	13.3
2020-07-30 18:21:00	23	54.3	13.3
2020-07-30 18:36:00	22.8	54.6	13.2
2020-07-30 18:51:00	22.7	55	13.2
2020-07-30 19:06:00	22.6	55.3	13.2
2020-07-30 19:21:00	22.4	55.6	13.1
2020-07-30 19:36:00	22.4	55.9	13.2
2020-07-30 19:51:00	22.3	56	13.1
2020-07-30 20:06:00	22.3	56.3	13.2
2020-07-30 20:21:00	22.3	56.4	13.2
2020-07-30 20:36:00	22.2	56.7	13.2
2020-07-30 20:51:00	22.2	56.8	13.2
2020-07-30 21:06:00	22.1	56.9	13.2
2020-07-30 21:21:00	22.1	57	13.2
2020-07-30 21:36:00	22	57.3	13.2
2020-07-30 21:51:00	21.9	57.6	13.2
2020-07-30 22:06:00	21.9	57.8	13.2
2020-07-30 22:21:00	21.8	57.8	13.1
2020-07-30 22:36:00	21.7	57.9	13
2020-07-30 22:51:00	21.7	58.1	13.1
2020-07-30 23:06:00	21.6	58.1	13
2020-07-30 23:21:00	21.6	57.9	13
2020-07-30 23:36:00	21.5	57.9	12.9
2020-07-30 23:51:00	21.5	57.9	12.9
2020-07-31 00:06:00	21.4	57.8	12.7
2020-07-31 00:21:00	21.4	57.8	12.7
2020-07-31 00:36:00	21.3	57.7	12.6
2020-07-31 00:51:00	21.2	57.6	12.5
2020-07-31 01:06:00	21.2	57.4	12.4
2020-07-31 01:21:00	21.1	57.3	12.3
2020-07-31 01:36:00	21	57.2	12.2
2020-07-31 01:51:00	21	57.1	12.2
2020-07-31 02:06:00	20.9	56.9	12
2020-07-31 02:21:00	20.8	56.8	11.9
2020-07-31 02:36:00	20.8	56.7	11.9
2020-07-31 02:51:00	20.7	56.6	11.8
2020-07-31 03:06:00	20.7	56.6	11.8
2020-07-31 03:21:00	20.6	56.4	11.6
2020-07-31 03:36:00	20.5	56.4	11.5
2020-07-31 03:51:00	20.5	56.3	11.5
2020-07-31 04:06:00	20.5	56.1	11.4
2020-07-31 04:21:00	20.4	55.9	11.3
2020-07-31 04:36:00	20.4	55.8	11.3
2020-07-31 04:51:00	20.3	55.7	11.2
2020-07-31 05:06:00	20.3	55.7	11.2
2020-07-31 05:21:00	20.2	55.6	11
2020-07-31 05:36:00	20.2	55.5	11
2020-07-31 05:51:00	20.2	55.3	10.9
2020-07-31 06:06:00	20.2	55.2	10.9
2020-07-31 06:21:00	20.1	55.1	10.8
2020-07-31 06:36:00	20.1	54.8	10.7
2020-07-31 06:51:00	20.1	54.7	10.7
2020-07-31 07:06:00	20.1	54.6	10.7
2020-07-31 07:21:00	20	54.3	10.5
2020-07-31 07:36:00	20.1	54.2	10.6
2020-07-31 07:51:00	20.1	53.8	10.4
2020-07-31 08:06:00	20.3	53.4	10.5
2020-07-31 08:21:00	20.5	52.7	10.5
2020-07-31 08:36:00	20.7	51.8	10.4
2020-07-31 08:51:00	21.2	51	10.7
2020-07-31 09:06:00	21.7	49.9	10.8
2020-07-31 09:21:00	22.5	48.6	11.1
2020-07-31 09:36:00	24	45.7	11.6
2020-07-31 09:51:00	25.8	42.7	12.2
2020-07-31 10:06:00	27	40.8	12.5
2020-07-31 10:21:00	27.8	39.6	12.8
2020-07-31 10:36:00	28.5	38.7	13.1
2020-07-31 10:51:00	29.4	37.5	13.4
2020-07-31 11:06:00	30.4	36.3	13.8
2020-07-31 11:21:00	31.3	35.2	14.1
2020-07-31 11:36:00	32.1	34.2	14.4
2020-07-31 11:51:00	32.5	33.7	14.5
2020-07-31 12:06:00	32.9	33.2	14.6
2020-07-31 12:21:00	33.1	33	14.7
2020-07-31 12:36:00	33.2	32.9	14.7
2020-07-31 12:51:00	33.8	32	14.8
2020-07-31 13:06:00	34.7	31.1	15.1
2020-07-31 13:21:00	35.1	30.4	15.1
2020-07-31 13:36:00	34.6	30.8	14.9
2020-07-31 13:51:00	32.5	33.4	14.3
2020-07-31 14:06:00	30.4	36	13.7
2020-07-31 14:21:00	29.1	38.3	13.5
2020-07-31 14:36:00	28.4	39.7	13.4
2020-07-31 14:51:00	27.9	40.5	13.2
2020-07-31 15:06:00	27.5	41.2	13.1
2020-07-31 15:21:00	27.2	41.9	13.1
2020-07-31 15:36:00	27	42.6	13.2
2020-07-31 15:51:00	26.7	43.1	13.1
2020-07-31 16:06:00	26.4	43.7	13.1
2020-07-31 16:21:00	26.1	44.3	13
2020-07-31 16:36:00	25.8	45.2	13
2020-07-31 16:51:00	25.5	45.9	13
2020-07-31 17:06:00	25.2	46.7	13
2020-07-31 17:21:00	24.8	47.6	12.9
2020-07-31 17:36:00	24.6	48.3	13
2020-07-31 17:51:00	24.3	49.1	12.9
2020-07-31 18:06:00	24	49.7	12.8
2020-07-31 18:21:00	23.7	50.4	12.8
2020-07-31 18:36:00	23.5	50.9	12.7
2020-07-31 18:51:00	23.3	51.3	12.7
2020-07-31 19:06:00	23.2	51.6	12.7
2020-07-31 19:21:00	23	51.8	12.6
2020-07-31 19:36:00	23	52	12.6
2020-07-31 19:51:00	22.9	52	12.5
2020-07-31 20:06:00	22.9	52.1	12.5
2020-07-31 20:21:00	22.8	52.3	12.5
2020-07-31 20:36:00	22.7	52.5	12.5
2020-07-31 20:51:00	22.7	52.6	12.5
2020-07-31 21:06:00	22.6	52.7	12.4
2020-07-31 21:21:00	22.6	52.9	12.5
2020-07-31 21:36:00	22.5	53.1	12.5
2020-07-31 21:51:00	22.4	53.5	12.5
2020-07-31 22:06:00	22.3	53.8	12.5
2020-07-31 22:21:00	22.3	54	12.5
2020-07-31 22:36:00	22.2	54.1	12.5
2020-07-31 22:51:00	22.1	54.1	12.4
2020-07-31 23:06:00	22.1	54.1	12.4
2020-07-31 23:21:00	22	54.1	12.3
2020-07-31 23:36:00	21.9	54.3	12.3
2020-07-31 23:51:00	21.9	54.3	12.3
2020-08-01 00:06:00	21.8	54.4	12.2
2020-08-01 00:21:00	21.8	54.5	12.2
2020-08-01 00:36:00	21.7	54.8	12.2
2020-08-01 00:51:00	21.7	54.9	12.2
2020-08-01 01:06:00	21.6	55	12.2
2020-08-01 01:21:00	21.5	55.2	12.1
2020-08-01 01:36:00	21.5	55.2	12.1
2020-08-01 01:51:00	21.4	55.2	12
2020-08-01 02:06:00	21.3	55.2	11.9
2020-08-01 02:21:00	21.2	55.2	11.9
2020-08-01 02:36:00	21.2	54.9	11.8
2020-08-01 02:51:00	21.1	54.9	11.7
2020-08-01 03:06:00	21	54.9	11.6
2020-08-01 03:21:00	21	54.9	11.6
2020-08-01 03:36:00	21	55	11.6
2020-08-01 03:51:00	20.9	55	11.5
2020-08-01 04:06:00	20.9	55.2	11.6
2020-08-01 04:21:00	20.9	55.3	11.6
2020-08-01 04:36:00	20.8	55.4	11.5
2020-08-01 04:51:00	20.8	55.6	11.6
2020-08-01 05:06:00	20.8	55.7	11.6
2020-08-01 05:21:00	20.8	55.9	11.7
2020-08-01 05:36:00	20.7	55.9	11.6
2020-08-01 05:51:00	20.7	55.8	11.6
2020-08-01 06:06:00	20.7	55.6	11.5
2020-08-01 06:21:00	20.7	55.3	11.4
2020-08-01 06:36:00	20.7	55	11.3
2020-08-01 06:51:00	20.6	54.7	11.2
2020-08-01 07:06:00	20.6	54.3	11
2020-08-01 07:21:00	20.5	53.7	10.8
2020-08-01 07:36:00	20.5	53.2	10.6
2020-08-01 07:51:00	20.5	53.2	10.6
2020-08-01 08:06:00	20.7	53.3	10.9
2020-08-01 08:21:00	20.9	53	11
2020-08-01 08:36:00	21.2	52.6	11.1
2020-08-01 08:51:00	21.6	52	11.3
2020-08-01 09:06:00	22.2	50.8	11.5
2020-08-01 09:21:00	23	49.3	11.8
2020-08-01 09:36:00	24.7	46.1	12.3
2020-08-01 09:51:00	26.4	43.1	12.8
2020-08-01 10:06:00	27.5	42.8	13.7
2020-08-01 10:21:00	28.5	41.6	14.2
2020-08-01 10:36:00	28.5	41.8	14.3
2020-08-01 10:51:00	28.4	42.6	14.5
2020-08-01 11:06:00	27.6	43.9	14.2
2020-08-01 11:21:00	28.9	42.2	14.8
2020-08-01 11:36:00	29.9	40.8	15.1
2020-08-01 11:51:00	29.9	40.9	15.2
2020-08-01 12:06:00	29.2	42.4	15.1
2020-08-01 12:21:00	29.6	42	15.3
2020-08-01 12:36:00	30.3	41.6	15.8
2020-08-01 12:51:00	31.7	40.6	16.7
2020-08-01 13:06:00	32.7	38.9	16.9
2020-08-01 13:21:00	32.3	39.7	16.9
2020-08-01 13:36:00	32	40.3	16.8
2020-08-01 13:51:00	30.7	42.3	16.4
2020-08-01 14:06:00	29.2	44.8	16
2020-08-01 14:21:00	28.1	46.8	15.7
2020-08-01 14:36:00	27.5	47.7	15.4
2020-08-01 14:51:00	27.1	47.9	15.1
2020-08-01 15:06:00	26.9	48.4	15.1
2020-08-01 15:21:00	26.7	48.5	14.9
2020-08-01 15:36:00	26.4	49.1	14.9
2020-08-01 15:51:00	26.2	49.1	14.7
2020-08-01 16:06:00	26	49.3	14.6
2020-08-01 16:21:00	25.7	49.7	14.4
2020-08-01 16:36:00	25.5	50.1	14.3
2020-08-01 16:51:00	25.2	50.3	14.1
2020-08-01 17:06:00	24.9	51.1	14.1
2020-08-01 17:21:00	24.6	51.5	13.9
2020-08-01 17:36:00	24.3	52.2	13.9
2020-08-01 17:51:00	24	52.8	13.8
2020-08-01 18:06:00	23.8	53.5	13.8
2020-08-01 18:21:00	23.5	54	13.7
2020-08-01 18:36:00	23.3	54.5	13.6
2020-08-01 18:51:00	23.1	54.6	13.5
2020-08-01 19:06:00	22.9	54.9	13.3
2020-08-01 19:21:00	22.8	55.1	13.3
2020-08-01 19:36:00	22.7	55.3	13.3
2020-08-01 19:51:00	22.6	54.9	13.1
2020-08-01 20:06:00	22.5	54.6	12.9
2020-08-01 20:21:00	22.4	54.5	12.8
2020-08-01 20:36:00	22.4	54.6	12.8
2020-08-01 20:51:00	22.3	54.3	12.6
2020-08-01 21:06:00	22.3	53.9	12.5
2020-08-01 21:21:00	22.3	53.6	12.4
2020-08-01 21:36:00	22.3	53.6	12.4
2020-08-01 21:51:00	22.3	54	12.5
2020-08-01 22:06:00	22.3	54.6	12.7
2020-08-01 22:21:00	22.2	55.2	12.8
2020-08-01 22:36:00	22.2	55.8	12.9
2020-08-01 22:51:00	22.1	56.4	13
2020-08-01 23:06:00	22.1	57	13.2
2020-08-01 23:21:00	22.1	57.7	13.4
2020-08-01 23:36:00	22	58.2	13.4
2020-08-01 23:51:00	22	58.8	13.6
2020-08-02 00:06:00	21.9	59.3	13.6
2020-08-02 00:21:00	21.8	59.6	13.6
2020-08-02 00:36:00	21.8	60.1	13.7
2020-08-02 00:51:00	21.7	60.3	13.7
2020-08-02 01:06:00	21.6	60.6	13.7
2020-08-02 01:21:00	21.6	60.7	13.7
2020-08-02 01:36:00	21.5	60.9	13.6
2020-08-02 01:51:00	21.4	60.9	13.5
2020-08-02 02:06:00	21.3	60.7	13.4
2020-08-02 02:21:00	21.2	60.6	13.3
2020-08-02 02:36:00	21.2	60.2	13.2
2020-08-02 02:51:00	21.1	60	13
2020-08-02 03:06:00	21.1	59.8	13
2020-08-02 03:21:00	21	59.6	12.8
2020-08-02 03:36:00	21	59.5	12.8
2020-08-02 03:51:00	20.9	59.2	12.6
2020-08-02 04:06:00	20.9	59.1	12.6
2020-08-02 04:21:00	20.8	59.1	12.5
2020-08-02 04:36:00	20.7	59.2	12.4
2020-08-02 04:51:00	20.6	59.2	12.4
2020-08-02 05:06:00	20.5	59	12.2
2020-08-02 05:21:00	20.5	58.3	12
2020-08-02 05:36:00	20.4	58	11.9
2020-08-02 05:51:00	20.3	57.6	11.7
2020-08-02 06:06:00	20.2	57.1	11.4
2020-08-02 06:21:00	20.2	57	11.4
2020-08-02 06:36:00	20.1	56.8	11.3
2020-08-02 06:51:00	20.1	56.7	11.2
2020-08-02 07:06:00	20.1	56.6	11.2
2020-08-02 07:21:00	20	56.6	11.1
2020-08-02 07:36:00	20	56.3	11
2020-08-02 07:51:00	20.1	55.9	11
2020-08-02 08:06:00	20.3	55.5	11.1
2020-08-02 08:21:00	20.5	54.8	11.1
2020-08-02 08:36:00	20.8	54	11.1
2020-08-02 08:51:00	21.1	52.6	11
2020-08-02 09:06:00	21.5	51.6	11.1
2020-08-02 09:21:00	22.2	50	11.3
2020-08-02 09:36:00	23.6	46.3	11.4
2020-08-02 09:51:00	25.2	42.4	11.5
2020-08-02 10:06:00	26.2	39.5	11.3
2020-08-02 10:21:00	26.8	37.4	11
2020-08-02 10:36:00	27.4	35.6	10.8
2020-08-02 10:51:00	28.1	33.9	10.7
2020-08-02 11:06:00	28.9	32	10.5
2020-08-02 11:21:00	29.5	30.6	10.4
2020-08-02 11:36:00	30.1	28.9	10.1
2020-08-02 11:51:00	30.6	27.6	9.8
2020-08-02 12:06:00	31.1	27.1	9.9
2020-08-02 12:21:00	31.4	25.9	9.5
2020-08-02 12:36:00	31.5	25.5	9.4
2020-08-02 12:51:00	32.2	25.2	9.8
2020-08-02 13:06:00	33.2	24.7	10.3
2020-08-02 13:21:00	34.3	23.7	10.6
2020-08-02 13:36:00	34.3	24.2	11
2020-08-02 13:51:00	32.3	26.1	10.4
2020-08-02 14:06:00	30.5	28.6	10.2
2020-08-02 14:21:00	29.3	29.9	9.9
2020-08-02 14:36:00	28.6	30.3	9.5
2020-08-02 14:51:00	28.2	30.4	9.2
2020-08-02 15:06:00	27.9	30.8	9.1
2020-08-02 15:21:00	27.7	31.6	9.3
2020-08-02 15:36:00	27.4	32.2	9.3
2020-08-02 15:51:00	27.1	32.8	9.3
2020-08-02 16:06:00	26.8	33.6	9.4
2020-08-02 16:21:00	26.6	33.9	9.4
2020-08-02 16:36:00	26.3	34.5	9.4
2020-08-02 16:51:00	26	35	9.3
2020-08-02 17:06:00	25.6	35.4	9.2
2020-08-02 17:21:00	25.3	36.1	9.2
2020-08-02 17:36:00	25.1	36.8	9.3
2020-08-02 17:51:00	24.8	37.4	9.3
2020-08-02 18:06:00	24.6	37.9	9.3
2020-08-02 18:21:00	24.3	38.5	9.3
2020-08-02 18:36:00	24.2	39.2	9.4
2020-08-02 18:51:00	24.1	39.8	9.6
2020-08-02 19:06:00	24	40.3	9.7
2020-08-02 19:21:00	23.9	40.7	9.7
2020-08-02 19:36:00	23.8	41.1	9.8
2020-08-02 19:51:00	23.8	41.6	10
2020-08-02 20:06:00	23.7	42	10
2020-08-02 20:21:00	23.7	42.3	10.1
2020-08-02 20:36:00	23.6	42.7	10.2
2020-08-02 20:51:00	23.5	42.9	10.2
2020-08-02 21:06:00	23.3	43.3	10.1
2020-08-02 21:21:00	23.3	43.5	10.2
2020-08-02 21:36:00	23.1	43.8	10.1
2020-08-02 21:51:00	23	44.1	10.1
2020-08-02 22:06:00	23	44.4	10.2
2020-08-02 22:21:00	23	44.7	10.3
2020-08-02 22:36:00	22.9	45	10.3
2020-08-02 22:51:00	22.9	45.1	10.4
2020-08-02 23:06:00	22.8	45.4	10.4
2020-08-02 23:21:00	22.8	45.5	10.4
2020-08-02 23:36:00	22.7	45.7	10.4
2020-08-02 23:51:00	22.7	45.8	10.4
2020-08-03 00:06:00	22.7	46.1	10.5
2020-08-03 00:21:00	22.6	46	10.4
2020-08-03 00:36:00	22.5	46.1	10.3
2020-08-03 00:51:00	22.4	46.4	10.3
2020-08-03 01:06:00	22.4	46.1	10.2
2020-08-03 01:21:00	22.3	46.1	10.1
2020-08-03 01:36:00	22.3	46	10.1
2020-08-03 01:51:00	22.3	45.8	10.1
2020-08-03 02:06:00	22.2	45.7	9.9
2020-08-03 02:21:00	22.2	45.4	9.8
2020-08-03 02:36:00	22.2	45.3	9.8
2020-08-03 02:51:00	22.1	45	9.6
2020-08-03 03:06:00	22.1	44.7	9.5
2020-08-03 03:21:00	22.1	44.4	9.4
2020-08-03 03:36:00	22.1	43.8	9.2
2020-08-03 03:51:00	22	43.6	9
2020-08-03 04:06:00	22	43.4	9
2020-08-03 04:21:00	21.9	43.3	8.9
2020-08-03 04:36:00	21.8	43.2	8.7
2020-08-03 04:51:00	21.8	42.9	8.6
2020-08-03 05:06:00	21.7	42.7	8.5
2020-08-03 05:21:00	21.7	42.9	8.5
2020-08-03 05:36:00	21.6	43.2	8.5
2020-08-03 05:51:00	21.6	43	8.5
2020-08-03 06:06:00	21.5	42.9	8.4
2020-08-03 06:21:00	21.4	42.7	8.2
2020-08-03 06:36:00	21.4	43	8.3
2020-08-03 06:51:00	21.3	43	8.2
2020-08-03 07:06:00	21.2	42.2	7.8
2020-08-03 07:21:00	21.2	40.9	7.4
2020-08-03 07:36:00	21.2	39.6	6.9
2020-08-03 07:51:00	21.3	38	6.4
2020-08-03 08:06:00	21.4	36.4	5.9
2020-08-03 08:21:00	21.6	36.2	6
2020-08-03 08:36:00	21.9	35.7	6
2020-08-03 08:51:00	22.2	34.7	5.9
2020-08-03 09:06:00	22.8	35.4	6.7
2020-08-03 09:21:00	23.6	34.5	7
2020-08-03 09:36:00	25	33.8	8
2020-08-03 09:51:00	26.7	32.5	8.9
2020-08-03 10:06:00	27.7	30.9	9
2020-08-03 10:21:00	28.2	30.9	9.4
2020-08-03 10:36:00	28.6	31.2	9.9
2020-08-03 10:51:00	29.2	31.3	10.5
2020-08-03 11:06:00	29.9	31	10.9
2020-08-03 11:21:00	30.6	30.9	11.5
2020-08-03 11:36:00	31.5	30.2	11.9
2020-08-03 11:51:00	32.4	29.3	12.2
2020-08-03 12:06:00	33	27.9	12
2020-08-03 12:21:00	33.4	26.7	11.7
2020-08-03 12:36:00	33.5	26.4	11.6
2020-08-03 12:51:00	34	26.1	11.8
2020-08-03 13:06:00	34.7	26	12.4
2020-08-03 13:21:00	35.1	26	12.7
2020-08-03 13:36:00	34.1	27.5	12.7
2020-08-03 13:51:00	31.9	31.4	12.9
2020-08-03 14:06:00	30	35	12.9
2020-08-03 14:21:00	28.9	36.9	12.7
2020-08-03 14:36:00	28.2	37.9	12.5
2020-08-03 14:51:00	27.8	38.8	12.5
2020-08-03 15:06:00	27.4	40.3	12.7
2020-08-03 15:21:00	27.1	42	13.1
2020-08-03 15:36:00	26.8	43.7	13.4
2020-08-03 15:51:00	26.5	45.1	13.6
2020-08-03 16:06:00	26.3	46.3	13.9
2020-08-03 16:21:00	26	47.4	13.9
2020-08-03 16:36:00	25.8	48.1	14
2020-08-03 16:51:00	25.5	48.7	13.9
2020-08-03 17:06:00	25.3	49.3	13.9
2020-08-03 17:21:00	25	50	13.9
2020-08-03 17:36:00	24.7	50.9	13.9
2020-08-03 17:51:00	24.3	51.9	13.8
2020-08-03 18:06:00	24.1	52.8	13.9
2020-08-03 18:21:00	23.8	53.6	13.8
2020-08-03 18:36:00	23.6	54.1	13.8
2020-08-03 18:51:00	23.5	54.4	13.8
2020-08-03 19:06:00	23.5	54.6	13.8
2020-08-03 19:21:00	23.4	54.7	13.8
2020-08-03 19:36:00	23.3	55	13.7
2020-08-03 19:51:00	23.3	55.1	13.8
2020-08-03 20:06:00	23.2	55.4	13.8
2020-08-03 20:21:00	23.1	55.8	13.8
2020-08-03 20:36:00	23	55.8	13.7
2020-08-03 20:51:00	23	55.9	13.7
2020-08-03 21:06:00	22.9	56.2	13.7
2020-08-03 21:21:00	22.9	56.4	13.8
2020-08-03 21:36:00	22.8	56.4	13.7
2020-08-03 21:51:00	22.8	56.7	13.8
2020-08-03 22:06:00	22.7	56.7	13.7
2020-08-03 22:21:00	22.7	57.1	13.8
2020-08-03 22:36:00	22.7	57.2	13.8
2020-08-03 22:51:00	22.6	57.3	13.7
2020-08-03 23:06:00	22.5	57.4	13.7
2020-08-03 23:21:00	22.5	57.7	13.7
2020-08-03 23:36:00	22.5	57.7	13.7
2020-08-03 23:51:00	22.5	57.7	13.7
2020-08-04 00:06:00	22.4	57.7	13.6
2020-08-04 00:21:00	22.4	57.6	13.6
2020-08-04 00:36:00	22.4	57.6	13.6
2020-08-04 00:51:00	22.4	57.4	13.6
2020-08-04 01:06:00	22.4	57.4	13.6
2020-08-04 01:21:00	22.3	57.4	13.5
2020-08-04 01:36:00	22.3	57.3	13.4
2020-08-04 01:51:00	22.2	57.2	13.3
2020-08-04 02:06:00	22.2	57	13.3
2020-08-04 02:21:00	22.1	56.9	13.2
2020-08-04 02:36:00	22.1	56.9	13.2
2020-08-04 02:51:00	22	56.8	13
2020-08-04 03:06:00	22	56.7	13
2020-08-04 03:21:00	22	56.7	13
2020-08-04 03:36:00	21.9	56.7	12.9
2020-08-04 03:51:00	21.9	56.8	12.9
2020-08-04 04:06:00	21.9	56.7	12.9
2020-08-04 04:21:00	21.8	56.8	12.8
2020-08-04 04:36:00	21.8	56.9	12.9
2020-08-04 04:51:00	21.8	57.1	12.9
2020-08-04 05:06:00	21.7	57.3	12.9
2020-08-04 05:21:00	21.7	57.3	12.9
2020-08-04 05:36:00	21.6	57.6	12.9
2020-08-04 05:51:00	21.6	57.7	12.9
2020-08-04 06:06:00	21.6	57.7	12.9
2020-08-04 06:21:00	21.6	57.8	12.9
2020-08-04 06:36:00	21.5	57.9	12.9
2020-08-04 06:51:00	21.5	58.1	12.9
2020-08-04 07:06:00	21.4	58.1	12.8
2020-08-04 07:21:00	21.4	58.2	12.8
2020-08-04 07:36:00	21.4	58.3	12.9
2020-08-04 07:51:00	21.4	58.2	12.8
2020-08-04 08:06:00	21.6	57.7	12.9
2020-08-04 08:21:00	21.7	57.3	12.9
2020-08-04 08:36:00	21.9	56.9	13
2020-08-04 08:51:00	22.2	55.9	13
2020-08-04 09:06:00	22.6	54.9	13.1
2020-08-04 09:21:00	23	54	13.2
2020-08-04 09:36:00	23.9	52.2	13.5
2020-08-04 09:44:00	22.9	54.3	13.2
2020-08-04 09:59:00	22.9	57.4	14
2020-08-04 10:14:00	24.2	51.9	13.7
2020-08-04 10:29:00	25.2	50.3	14.1
2020-08-04 10:44:00	25.5	47.8	13.6
2020-08-04 10:59:00	24.2	54.1	14.3
2020-08-04 11:14:00	24.3	52.1	13.8
2020-08-04 11:29:00	24.1	53.7	14.1
2020-08-04 11:44:00	24.4	52.9	14.2
2020-08-04 11:59:00	24.6	52.4	14.2
2020-08-04 12:14:00	24.8	52.1	14.3
2020-08-04 12:29:00	24.6	52.1	14.1
2020-08-04 12:44:00	26.5	48.2	14.7
2020-08-04 12:59:00	27.1	46.7	14.7
2020-08-04 13:14:00	28.5	43.7	15
2020-08-04 13:29:00	27.4	44.9	14.4
2020-08-04 13:44:00	25.7	48.2	13.9
2020-08-04 13:59:00	25	50	13.9
2020-08-04 14:14:00	24.8	50.2	13.7
2020-08-04 14:29:00	24.7	50.5	13.7
2020-08-04 14:44:00	24.3	50.9	13.5
2020-08-04 14:59:00	24.1	51.2	13.4
2020-08-04 15:14:00	23.9	51.2	13.2
2020-08-04 15:29:00	23.8	51	13.1
2020-08-04 15:44:00	23.7	50.9	12.9
2020-08-04 15:59:00	23.5	51.2	12.8
2020-08-04 16:14:00	23.2	51.3	12.6
2020-08-04 16:29:00	23	51.6	12.5
2020-08-04 16:44:00	22.7	51.7	12.2
2020-08-04 16:59:00	22.5	51.6	12
2020-08-04 17:14:00	22.2	52.4	12
2020-08-04 17:29:00	22	53.1	12
2020-08-04 17:44:00	21.8	53.3	11.9
2020-08-04 17:59:00	21.6	53.3	11.7
2020-08-04 18:14:00	21.4	53.7	11.6
2020-08-04 18:29:00	21.3	53.9	11.6
2020-08-04 18:44:00	21.1	54	11.4
2020-08-04 18:59:00	21	54.4	11.4
2020-08-04 19:14:00	20.9	54.5	11.4
2020-08-04 19:29:00	20.7	54.9	11.3
2020-08-04 19:44:00	20.6	55.3	11.3
2020-08-04 19:59:00	20.5	55.6	11.3
2020-08-04 20:14:00	20.5	55.5	11.3
2020-08-04 20:29:00	20.4	55.5	11.2
2020-08-04 20:44:00	20.3	55.5	11.1
2020-08-04 20:59:00	20.3	55.6	11.1
2020-08-04 21:14:00	20.2	55.6	11
2020-08-04 21:29:00	20.2	55.7	11.1
2020-08-04 21:44:00	20.2	55.7	11.1
2020-08-04 21:59:00	20.2	55.8	11.1
2020-08-04 22:14:00	20.2	55.7	11.1
2020-08-04 22:29:00	20.2	55.7	11.1
2020-08-04 22:44:00	20.2	55.8	11.1
2020-08-04 22:59:00	20.1	55.8	11
2020-08-04 23:14:00	20.1	55.8	11
2020-08-04 23:29:00	20.1	56.1	11.1
2020-08-04 23:44:00	20	56.2	11
2020-08-04 23:59:00	20	56.2	11
2020-08-05 00:14:00	19.9	56.2	10.9
2020-08-05 00:29:00	19.9	56.2	10.9
2020-08-05 00:44:00	19.9	56.1	10.9
2020-08-05 00:59:00	19.8	56.1	10.8
2020-08-05 01:14:00	19.8	55.9	10.7
2020-08-05 01:29:00	19.8	55.9	10.7
2020-08-05 01:44:00	19.7	56	10.7
2020-08-05 01:59:00	19.7	56	10.7
2020-08-05 02:14:00	19.7	56.2	10.7
2020-08-05 02:29:00	19.7	56.5	10.8
2020-08-05 02:44:00	19.6	56.6	10.7
2020-08-05 02:59:00	19.6	56.7	10.8
2020-08-05 03:14:00	19.5	57	10.8
2020-08-05 03:29:00	19.5	57.1	10.8
2020-08-05 03:44:00	19.4	57.1	10.7
2020-08-05 03:59:00	19.4	57.1	10.7
2020-08-05 04:14:00	19.4	57.1	10.7
2020-08-05 04:29:00	19.4	57	10.7
2020-08-05 04:44:00	19.4	57	10.7
2020-08-05 04:59:00	19.4	56.9	10.6
2020-08-05 05:14:00	19.3	56.9	10.5
2020-08-05 05:29:00	19.3	57	10.6
2020-08-05 05:44:00	19.3	57	10.6
2020-08-05 05:59:00	19.3	57	10.6
2020-08-05 06:14:00	19.2	57	10.5
2020-08-05 06:29:00	19.2	57.1	10.5
2020-08-05 06:44:00	19.1	57	10.4
2020-08-05 06:59:00	19.1	56.9	10.4
2020-08-05 07:14:00	19	56.7	10.2
2020-08-05 07:29:00	19	56.5	10.2
2020-08-05 07:44:00	19	56.5	10.2
2020-08-05 07:59:00	19	56.5	10.2
2020-08-05 08:14:00	19.2	56.2	10.3
2020-08-05 08:29:00	19.4	55.6	10.3
2020-08-05 08:44:00	19.8	54.9	10.5
2020-08-05 08:59:00	20.2	53.6	10.5
2020-08-05 09:14:00	20.6	52.8	10.6
2020-08-05 09:29:00	21.1	51.8	10.8
2020-08-05 09:44:00	21.6	51	11
2020-08-05 09:59:00	24	46	11.7
2020-08-05 10:14:00	26	41.8	12
2020-08-05 10:29:00	26.2	41.4	12.1
2020-08-05 10:44:00	25.6	42.6	11.9
2020-08-05 10:59:00	24.8	44.4	11.9
2020-08-05 11:14:00	24.3	45.6	11.8
2020-08-05 11:29:00	23.6	47.1	11.7
2020-08-05 11:44:00	23	48.6	11.6
2020-08-05 11:59:00	22.5	50.2	11.6
2020-08-05 12:14:00	22.1	51.4	11.6
2020-08-05 12:29:00	21.8	52.1	11.5
2020-08-05 12:44:00	21.7	52.6	11.6
2020-08-05 12:59:00	21.6	53.3	11.7
2020-08-05 13:14:00	21.6	53.1	11.6
2020-08-05 13:29:00	21.8	53	11.8
2020-08-05 13:44:00	21.9	53	11.9
2020-08-05 13:59:00	21.9	52.6	11.8
2020-08-05 14:14:00	22	52.5	11.8
2020-08-05 14:29:00	21.9	52.9	11.9
2020-08-05 14:44:00	21.8	53.1	11.8
2020-08-05 14:59:00	21.9	53	11.9
2020-08-05 15:14:00	21.9	52.9	11.9
2020-08-05 15:29:00	21.7	53.3	11.8
2020-08-05 15:44:00	21.4	54.1	11.7
2020-08-05 15:59:00	21.2	54.9	11.8
2020-08-05 16:14:00	20.9	55.7	11.7
2020-08-05 16:29:00	20.8	56.4	11.8
2020-08-05 16:44:00	20.7	56.8	11.8
2020-08-05 16:59:00	20.5	57.2	11.7
2020-08-05 17:14:00	20.4	57.4	11.7
2020-08-05 17:29:00	20.2	57.9	11.6
2020-08-05 17:44:00	20.1	58.1	11.6
2020-08-05 17:59:00	20.1	58.5	11.7
2020-08-05 18:14:00	20	58.7	11.7
2020-08-05 18:29:00	19.9	59	11.6
2020-08-05 18:44:00	19.8	59.2	11.6
2020-08-05 18:59:00	19.8	59.4	11.7
2020-08-05 19:14:00	19.7	59.5	11.6
2020-08-05 19:29:00	19.7	59.6	11.6
2020-08-05 19:44:00	19.7	59.7	11.6
2020-08-05 19:59:00	19.7	60	11.7
2020-08-05 20:14:00	19.6	60.1	11.6
2020-08-05 20:29:00	19.6	60.3	11.7
2020-08-05 20:44:00	19.6	60.4	11.7
2020-08-05 20:59:00	19.6	60.5	11.7
2020-08-05 21:14:00	19.5	60.6	11.7
2020-08-05 21:29:00	19.5	60.8	11.7
2020-08-05 21:44:00	19.5	61	11.8
2020-08-05 21:59:00	19.4	61.3	11.8
2020-08-05 22:14:00	19.4	61.6	11.8
2020-08-05 22:29:00	19.4	61.9	11.9
2020-08-05 22:44:00	19.3	62.1	11.9
2020-08-05 22:59:00	19.3	62.3	11.9
2020-08-05 23:14:00	19.3	62.4	11.9
2020-08-05 23:29:00	19.3	62.5	12
2020-08-05 23:44:00	19.2	62.7	11.9
2020-08-05 23:59:00	19.2	62.8	11.9
2020-08-06 00:14:00	19.2	62.9	12
2020-08-06 00:29:00	19.1	63	11.9
2020-08-06 00:44:00	19.1	63	11.9
2020-08-06 00:59:00	19.1	63	11.9
2020-08-06 01:14:00	19.1	63.1	11.9
2020-08-06 01:29:00	19	63	11.8
2020-08-06 01:44:00	19	63.2	11.8
2020-08-06 01:59:00	19	63.2	11.8
2020-08-06 02:14:00	19	63	11.8
2020-08-06 02:29:00	18.9	63.2	11.7
2020-08-06 02:44:00	18.9	63	11.7
2020-08-06 02:59:00	18.8	63	11.6
2020-08-06 03:14:00	18.8	63	11.6
2020-08-06 03:29:00	18.8	62.8	11.6
2020-08-06 03:44:00	18.7	62.5	11.4
2020-08-06 03:59:00	18.7	62.5	11.4
2020-08-06 04:14:00	18.6	62.4	11.3
2020-08-06 04:29:00	18.6	62.4	11.3
2020-08-06 04:44:00	18.5	62.2	11.1
2020-08-06 04:59:00	18.5	62	11.1
2020-08-06 05:14:00	18.4	61.9	11
2020-08-06 05:29:00	18.4	61.8	10.9
2020-08-06 05:44:00	18.3	61.4	10.7
2020-08-06 05:59:00	18.3	61.4	10.7
2020-08-06 06:14:00	18.3	61.2	10.7
2020-08-06 06:29:00	18.3	61.2	10.7
2020-08-06 06:44:00	18.3	61.1	10.7
2020-08-06 06:59:00	18.2	61.1	10.6
2020-08-06 07:14:00	18.2	60.9	10.5
2020-08-06 07:29:00	18.2	60.8	10.5
2020-08-06 07:44:00	18.2	60.7	10.5
2020-08-06 07:59:00	18.2	60.3	10.4
2020-08-06 08:14:00	18.2	59.9	10.3
2020-08-06 08:29:00	18.3	59.3	10.2
2020-08-06 08:44:00	18.3	59.3	10.2
2020-08-06 08:59:00	18.3	59.4	10.2
2020-08-06 09:14:00	18.3	59.5	10.3
2020-08-06 09:29:00	19.4	57	10.7
2020-08-06 09:44:00	21.4	52	11.1
2020-08-06 09:59:00	23	48.4	11.5
2020-08-06 10:14:00	22.7	49.2	11.5
2020-08-06 10:29:00	21.8	51.2	11.3
2020-08-06 10:44:00	20.8	53.8	11.1
2020-08-06 10:59:00	20.5	54.5	11
2020-08-06 11:14:00	23.4	47.8	11.7
2020-08-06 11:29:00	26.2	41.9	12.2
2020-08-06 11:44:00	27.9	38.8	12.6
2020-08-06 11:59:00	27	40.3	12.4
2020-08-06 12:14:00	27.4	39.5	12.4
2020-08-06 12:29:00	27.1	40.4	12.5
2020-08-06 12:44:00	26.1	42	12.2
2020-08-06 12:59:00	26.7	40.6	12.2
2020-08-06 13:14:00	27.5	39.5	12.5
2020-08-06 13:29:00	29	37.3	13
2020-08-06 13:44:00	28.4	37.8	12.6
2020-08-06 13:59:00	26.9	40	12.2
2020-08-06 14:14:00	25.6	42.1	11.8
2020-08-06 14:29:00	24.8	43.2	11.4
2020-08-06 14:44:00	24.3	44.1	11.3
2020-08-06 14:59:00	23.9	44.7	11.1
2020-08-06 15:14:00	23.5	45.5	11
2020-08-06 15:29:00	23.3	45.9	11
2020-08-06 15:44:00	23	46.2	10.8
2020-08-06 15:59:00	22.7	46.5	10.6
2020-08-06 16:14:00	22.3	47	10.4
2020-08-06 16:29:00	22.2	47.3	10.4
2020-08-06 16:44:00	21.9	48	10.4
2020-08-06 16:59:00	21.6	48.8	10.4
2020-08-06 17:14:00	21.2	49.9	10.3
2020-08-06 17:29:00	21	50.6	10.4
2020-08-06 17:44:00	20.7	51.4	10.3
2020-08-06 17:59:00	20.5	52.4	10.4
2020-08-06 18:14:00	20.4	52.7	10.4
2020-08-06 18:29:00	20.3	53.1	10.4
2020-08-06 18:44:00	20.1	53.4	10.3
2020-08-06 18:59:00	20.1	53.8	10.4
2020-08-06 19:14:00	19.9	54.1	10.3
2020-08-06 19:29:00	19.9	54.2	10.4
2020-08-06 19:44:00	19.8	54.5	10.4
2020-08-06 19:59:00	19.7	54.5	10.3
2020-08-06 20:14:00	19.7	54.5	10.3
2020-08-06 20:29:00	19.6	54.5	10.2
2020-08-06 20:44:00	19.6	54.6	10.2
2020-08-06 20:59:00	19.5	55	10.2
2020-08-06 21:14:00	19.4	55.1	10.1
2020-08-06 21:29:00	19.4	55	10.1
2020-08-06 21:44:00	19.4	55.1	10.1
2020-08-06 21:59:00	19.3	55.1	10.1
2020-08-06 22:14:00	19.3	55.2	10.1
2020-08-06 22:29:00	19.2	55.2	10
2020-08-06 22:44:00	19.2	55.2	10
2020-08-06 22:59:00	19.1	55.2	9.9
2020-08-06 23:14:00	19.1	55.2	9.9
2020-08-06 23:29:00	19.1	55.2	9.9
2020-08-06 23:44:00	19	55.1	9.8
2020-08-06 23:59:00	19	55.1	9.8
2020-08-07 00:14:00	19	55.1	9.8
2020-08-07 00:29:00	19	55.1	9.8
2020-08-07 00:44:00	18.9	54.9	9.6
2020-08-07 00:59:00	18.9	54.9	9.6
2020-08-07 01:14:00	18.8	55	9.6
2020-08-07 01:29:00	18.8	55	9.6
2020-08-07 01:44:00	18.8	54.9	9.5
2020-08-07 01:59:00	18.8	54.6	9.5
2020-08-07 02:14:00	18.8	54.5	9.4
2020-08-07 02:29:00	18.7	54.5	9.3
2020-08-07 02:44:00	18.7	54.4	9.3
2020-08-07 02:59:00	18.7	54.3	9.3
2020-08-07 03:14:00	18.7	54.3	9.3
2020-08-07 03:29:00	18.7	54.1	9.2
2020-08-07 03:44:00	18.6	54.1	9.1
2020-08-07 03:59:00	18.6	54.1	9.1
2020-08-07 04:14:00	18.6	54	9.1
2020-08-07 04:29:00	18.5	53.9	9
2020-08-07 04:44:00	18.5	53.6	8.9
2020-08-07 04:59:00	18.4	53.6	8.8
2020-08-07 05:14:00	18.4	53.6	8.8
2020-08-07 05:29:00	18.3	53.5	8.7
2020-08-07 05:44:00	18.3	53.3	8.6
2020-08-07 05:59:00	18.2	53.3	8.5
2020-08-07 06:14:00	18.1	53	8.4
2020-08-07 06:29:00	18.1	52.8	8.3
2020-08-07 06:44:00	18	52.5	8.1
2020-08-07 06:59:00	18	52.4	8.1
2020-08-07 07:14:00	18	52.2	8
2020-08-07 07:29:00	18	52	8
2020-08-07 07:44:00	18	51.8	7.9
2020-08-07 07:59:00	18.1	51.8	8
2020-08-07 08:14:00	18.2	51.5	8
2020-08-07 08:29:00	18.4	51.1	8.1
2020-08-07 08:44:00	18.8	50	8.2
2020-08-07 08:59:00	19.3	48.7	8.2
2020-08-07 09:14:00	20.1	47	8.4
2020-08-07 09:29:00	20.6	46.1	8.6
2020-08-07 09:44:00	20.5	46.5	8.6
2020-08-07 09:59:00	20.6	46.4	8.7
2020-08-07 10:14:00	20.8	47	9.1
2020-08-07 10:29:00	21	46.2	9
2020-08-07 10:44:00	21.1	45.8	9
2020-08-07 10:59:00	21.7	44.8	9.2
2020-08-07 11:14:00	23	42.3	9.5
2020-08-07 11:29:00	24	40.9	9.9
2020-08-07 11:44:00	24.3	40.8	10.1
2020-08-07 11:59:00	24.2	40.9	10.1
2020-08-07 12:14:00	26.2	38	10.8
2020-08-07 12:29:00	28	35.4	11.3
2020-08-07 12:44:00	29.4	33.9	11.9
2020-08-07 12:59:00	30.8	32.1	12.2
2020-08-07 13:14:00	31.8	31.3	12.7
2020-08-07 13:29:00	31.8	30.8	12.5
2020-08-07 13:44:00	30.2	32.7	12
2020-08-07 13:59:00	28	35.5	11.3
2020-08-07 14:14:00	26.5	37.9	11
2020-08-07 14:29:00	25.7	39.2	10.8
2020-08-07 14:44:00	25	40.2	10.5
2020-08-07 14:59:00	24.7	41	10.6
2020-08-07 15:14:00	24.5	41.5	10.6
2020-08-07 15:29:00	24.2	42.1	10.5
2020-08-07 15:44:00	24	42.6	10.5
2020-08-07 15:59:00	23.7	43	10.4
2020-08-07 16:14:00	23.5	43.6	10.4
2020-08-07 16:29:00	23.2	44.1	10.3
2020-08-07 16:44:00	22.9	44.8	10.3
2020-08-07 16:59:00	22.6	45.4	10.2
2020-08-07 17:14:00	22.3	46.3	10.2
2020-08-07 17:29:00	22	47	10.2
2020-08-07 17:44:00	21.8	47.5	10.1
2020-08-07 17:59:00	21.6	48.2	10.2
2020-08-07 18:14:00	21.2	49.2	10.1
2020-08-07 18:29:00	21	50	10.2
2020-08-07 18:44:00	20.8	50.5	10.1
2020-08-07 18:59:00	20.7	50.9	10.2
2020-08-07 19:14:00	20.6	51.6	10.3
2020-08-07 19:29:00	20.6	52	10.4
2020-08-07 19:44:00	20.6	52.4	10.5
2020-08-07 19:59:00	20.5	52.9	10.6
2020-08-07 20:14:00	20.5	53.2	10.6
2020-08-07 20:29:00	20.4	53.6	10.7
2020-08-07 20:44:00	20.3	53.9	10.7
2020-08-07 20:59:00	20.2	54.5	10.7
2020-08-07 21:14:00	20.2	54.7	10.8
2020-08-07 21:29:00	20.1	55.3	10.9
2020-08-07 21:44:00	20.1	55.8	11
2020-08-07 21:59:00	20	56.1	11
2020-08-07 22:14:00	19.9	56.5	11
2020-08-07 22:29:00	19.9	56.8	11.1
2020-08-07 22:44:00	19.9	57.2	11.2
2020-08-07 22:59:00	19.8	57.4	11.1
2020-08-07 23:14:00	19.8	57.6	11.2
2020-08-07 23:29:00	19.7	57.9	11.2
2020-08-07 23:44:00	19.7	58.2	11.3
2020-08-07 23:59:00	19.6	58.4	11.2
2020-08-08 00:14:00	19.6	58.6	11.3
2020-08-08 00:29:00	19.6	58.8	11.3
2020-08-08 00:44:00	19.5	59	11.3
2020-08-08 00:59:00	19.5	59.1	11.3
2020-08-08 01:14:00	19.4	59.2	11.2
2020-08-08 01:29:00	19.4	59.4	11.3
2020-08-08 01:44:00	19.3	59.5	11.2
2020-08-08 01:59:00	19.3	59.5	11.2
2020-08-08 02:14:00	19.2	59.6	11.1
2020-08-08 02:29:00	19.1	59.6	11
2020-08-08 02:44:00	19.1	59.6	11
2020-08-08 02:59:00	19	59.3	10.9
2020-08-08 03:14:00	18.9	59.2	10.8
2020-08-08 03:29:00	18.8	59	10.6
2020-08-08 03:44:00	18.7	58.8	10.5
2020-08-08 03:59:00	18.6	58.5	10.3
2020-08-08 04:14:00	18.5	58.4	10.2
2020-08-08 04:29:00	18.5	58.4	10.2
2020-08-08 04:44:00	18.4	58.1	10
2020-08-08 04:59:00	18.4	57.7	9.9
2020-08-08 05:14:00	18.4	57.3	9.8
2020-08-08 05:29:00	18.3	57	9.6
2020-08-08 05:44:00	18.2	56.8	9.5
2020-08-08 05:59:00	18.2	56.7	9.5
2020-08-08 06:14:00	18.1	56.5	9.3
2020-08-08 06:29:00	18.1	56	9.2
2020-08-08 06:44:00	18	55.9	9.1
2020-08-08 06:59:00	18	55.8	9
2020-08-08 07:14:00	18	55.4	8.9
2020-08-08 07:29:00	18	55.3	8.9
2020-08-08 07:44:00	18	55	8.8
2020-08-08 07:59:00	18.1	54.5	8.8
2020-08-08 08:14:00	18.3	53.9	8.8
2020-08-08 08:29:00	18.6	53.4	8.9
2020-08-08 08:44:00	19	52.6	9.1
2020-08-08 08:59:00	19.4	51.2	9.1
2020-08-08 09:14:00	19.9	50.3	9.3
2020-08-08 09:29:00	20.7	48.4	9.4
2020-08-08 09:44:00	22	45.4	9.6
2020-08-08 09:59:00	23.2	42.8	9.9
2020-08-08 10:14:00	24	41.3	10
2020-08-08 10:29:00	24.7	40	10.2
2020-08-08 10:44:00	25.1	39.7	10.4
2020-08-08 10:59:00	25.1	40	10.5
2020-08-08 11:14:00	25.2	40.2	10.7
2020-08-08 11:29:00	26.1	38.8	11
2020-08-08 11:44:00	26.7	38.2	11.3
2020-08-08 11:59:00	26.7	38.3	11.3
2020-08-08 12:14:00	27.1	37.8	11.5
2020-08-08 12:29:00	27.5	36.9	11.5
2020-08-08 12:44:00	27.9	36.4	11.6
2020-08-08 12:59:00	28.8	35.1	11.9
2020-08-08 13:14:00	30.3	33.6	12.5
2020-08-08 13:29:00	31	32.5	12.6
2020-08-08 13:44:00	29.7	34	12.2
2020-08-08 13:59:00	27.9	36.4	11.6
2020-08-08 14:14:00	26.6	38.4	11.3
2020-08-08 14:29:00	25.9	39.9	11.2
2020-08-08 14:44:00	25.4	40.9	11.2
2020-08-08 14:59:00	25.1	41.6	11.1
2020-08-08 15:14:00	24.8	42.4	11.2
2020-08-08 15:29:00	24.5	43	11.1
2020-08-08 15:44:00	24.2	43.7	11.1
2020-08-08 15:59:00	24	44.3	11.1
2020-08-08 16:14:00	23.8	45	11.1
2020-08-08 16:29:00	23.5	45.8	11.1
2020-08-08 16:44:00	23.2	46.5	11.1
2020-08-08 16:59:00	22.9	47.4	11.1
2020-08-08 17:14:00	22.7	48.1	11.2
2020-08-08 17:29:00	22.4	48.8	11.1
2020-08-08 17:44:00	22.2	49.5	11.1
2020-08-08 17:59:00	21.9	50.5	11.2
2020-08-08 18:14:00	21.7	51	11.1
2020-08-08 18:29:00	21.5	51.7	11.1
2020-08-08 18:44:00	21.2	52.4	11.1
2020-08-08 18:59:00	21.1	53	11.1
2020-08-08 19:14:00	20.9	53.7	11.2
2020-08-08 19:29:00	20.9	54.3	11.3
2020-08-08 19:44:00	20.8	54.9	11.4
2020-08-08 19:59:00	20.7	55.3	11.4
2020-08-08 20:14:00	20.7	55.8	11.6
2020-08-08 20:29:00	20.7	56.2	11.7
2020-08-08 20:44:00	20.6	56.4	11.6
2020-08-08 20:59:00	20.6	56.7	11.7
2020-08-08 21:14:00	20.6	56.9	11.8
2020-08-08 21:29:00	20.5	57.3	11.8
2020-08-08 21:44:00	20.5	57.6	11.8
2020-08-08 21:59:00	20.5	57.7	11.9
2020-08-08 22:14:00	20.5	57.7	11.9
2020-08-08 22:29:00	20.5	57.9	11.9
2020-08-08 22:44:00	20.4	58.1	11.9
2020-08-08 22:59:00	20.4	58	11.9
2020-08-08 23:14:00	20.3	58.1	11.8
2020-08-08 23:29:00	20.3	58.1	11.8
2020-08-08 23:44:00	20.2	58.1	11.7
2020-08-08 23:59:00	20.1	58.1	11.6
2020-08-09 00:14:00	20.1	58.2	11.6
2020-08-09 00:29:00	20	58.3	11.6
2020-08-09 00:44:00	19.9	58.5	11.5
2020-08-09 00:59:00	19.9	58.6	11.5
2020-08-09 01:14:00	19.9	59	11.6
2020-08-09 01:29:00	19.8	59.2	11.6
2020-08-09 01:44:00	19.8	59.2	11.6
2020-08-09 01:59:00	19.7	59.1	11.5
2020-08-09 02:14:00	19.7	58.9	11.4
2020-08-09 02:29:00	19.7	58.8	11.4
2020-08-09 02:44:00	19.6	58.5	11.2
2020-08-09 02:59:00	19.6	58.2	11.2
2020-08-09 03:14:00	19.6	58.2	11.2
2020-08-09 03:29:00	19.5	58.1	11
2020-08-09 03:44:00	19.5	57.6	10.9
2020-08-09 03:59:00	19.4	56.4	10.5
2020-08-09 04:14:00	19.4	54.5	10
2020-08-09 04:29:00	19.4	52.8	9.5
2020-08-09 04:44:00	19.4	51.6	9.2
2020-08-09 04:59:00	19.4	50.8	8.9
2020-08-09 05:14:00	19.4	50.3	8.8
2020-08-09 05:29:00	19.3	50.2	8.7
2020-08-09 05:44:00	19.3	50.2	8.7
2020-08-09 05:59:00	19.3	50.4	8.7
2020-08-09 06:14:00	19.3	50.7	8.8
2020-08-09 06:29:00	19.2	51.1	8.8
2020-08-09 06:44:00	19.2	51.3	8.9
2020-08-09 06:59:00	19.2	51.6	9
2020-08-09 07:14:00	19.1	51.8	9
2020-08-09 07:29:00	19.1	52	9
2020-08-09 07:44:00	19.1	52	9
2020-08-09 07:59:00	19.3	51.6	9.1
2020-08-09 08:14:00	19.4	50.7	8.9
2020-08-09 08:29:00	19.6	50.2	8.9
2020-08-09 08:44:00	19.9	49.4	9
2020-08-09 08:59:00	20.3	48.5	9.1
2020-08-09 09:14:00	20.9	47.7	9.4
2020-08-09 09:29:00	22.1	45.7	9.8
2020-08-09 09:44:00	23.7	42	10
2020-08-09 09:59:00	25.4	38.3	10.2
2020-08-09 10:14:00	26.4	36.4	10.3
2020-08-09 10:29:00	27	35.3	10.4
2020-08-09 10:44:00	27.6	33.9	10.3
2020-08-09 10:59:00	28.2	32.7	10.3
2020-08-09 11:14:00	28.8	31	10
2020-08-09 11:29:00	29.2	29.7	9.7
2020-08-09 11:44:00	29.6	30	10.2
2020-08-09 11:59:00	30.3	28.9	10.2
2020-08-09 12:14:00	31	28.3	10.5
2020-08-09 12:29:00	31.1	27.1	9.9
2020-08-09 12:44:00	31.3	27.4	10.3
2020-08-09 12:59:00	31.8	26.5	10.2
2020-08-09 13:14:00	32.8	26.2	10.9
2020-08-09 13:29:00	33	26.2	11.1
2020-08-09 13:44:00	31.1	27.6	10.2
2020-08-09 13:59:00	29	29.9	9.6
2020-08-09 14:14:00	27.5	31.6	9.1
2020-08-09 14:29:00	26.9	32.6	9.1
2020-08-09 14:44:00	26.6	33.8	9.4
2020-08-09 14:59:00	26.2	34.9	9.5
2020-08-09 15:14:00	25.8	36	9.6
2020-08-09 15:29:00	25.5	37.2	9.8
2020-08-09 15:44:00	25.1	38.3	9.9
2020-08-09 15:59:00	24.7	39.5	10
2020-08-09 16:14:00	24.4	40.5	10.1
2020-08-09 16:29:00	24.1	41.4	10.2
2020-08-09 16:44:00	23.8	42.2	10.2
2020-08-09 16:59:00	23.5	43	10.2
2020-08-09 17:14:00	23.2	43.9	10.2
2020-08-09 17:29:00	22.9	44.8	10.3
2020-08-09 17:44:00	22.5	45.7	10.2
2020-08-09 17:59:00	22.3	46.6	10.3
2020-08-09 18:14:00	22	47.4	10.3
2020-08-09 18:29:00	21.8	48.2	10.4
2020-08-09 18:44:00	21.6	49.4	10.5
2020-08-09 18:59:00	21.5	50.1	10.7
2020-08-09 19:14:00	21.4	50.9	10.8
2020-08-09 19:29:00	21.3	51.4	10.9
2020-08-09 19:44:00	21.3	51.9	11
2020-08-09 19:59:00	21.2	52.3	11
2020-08-09 20:14:00	21.2	52.5	11.1
2020-08-09 20:29:00	21.1	52.8	11.1
2020-08-09 20:44:00	21.1	52.6	11
2020-08-09 20:59:00	21	52.6	10.9
2020-08-09 21:14:00	21	52.8	11
2020-08-09 21:29:00	20.9	52.9	10.9
2020-08-09 21:44:00	20.9	53	11
2020-08-09 21:59:00	20.8	53.3	11
2020-08-09 22:14:00	20.8	53.2	10.9
2020-08-09 22:29:00	20.8	53.2	10.9
2020-08-09 22:44:00	20.7	53	10.8
2020-08-09 22:59:00	20.7	53	10.8
2020-08-09 23:14:00	20.7	52.9	10.7
2020-08-09 23:29:00	20.6	52.8	10.6
2020-08-09 23:44:00	20.6	52.8	10.6
2020-08-09 23:59:00	20.5	52.9	10.6
2020-08-10 00:14:00	20.5	52.9	10.6
2020-08-10 00:29:00	20.5	52.8	10.5
2020-08-10 00:44:00	20.5	52.7	10.5
2020-08-10 00:59:00	20.4	52.3	10.3
2020-08-10 01:14:00	20.4	52.2	10.3
2020-08-10 01:29:00	20.3	51.9	10.1
2020-08-10 01:44:00	20.3	51.7	10
2020-08-10 01:59:00	20.2	51.7	9.9
2020-08-10 02:14:00	20.2	51.3	9.8
2020-08-10 02:29:00	20.2	50.9	9.7
2020-08-10 02:44:00	20.2	50.5	9.6
2020-08-10 02:59:00	20.1	50.3	9.4
2020-08-10 03:14:00	20.1	49.9	9.3
2020-08-10 03:29:00	20	49.4	9.1
2020-08-10 03:44:00	20	49.2	9
2020-08-10 03:59:00	20	48.8	8.9
2020-08-10 04:14:00	19.9	48.3	8.7
2020-08-10 04:29:00	19.9	48.2	8.6
2020-08-10 04:44:00	19.9	48	8.6
2020-08-10 04:59:00	19.8	48.2	8.5
2020-08-10 05:14:00	19.8	48	8.5
2020-08-10 05:29:00	19.8	48.2	8.5
2020-08-10 05:44:00	19.7	48.1	8.4
2020-08-10 05:59:00	19.7	48.4	8.5
2020-08-10 06:14:00	19.7	48.4	8.5
2020-08-10 06:29:00	19.7	48.5	8.5
2020-08-10 06:44:00	19.7	48.7	8.6
2020-08-10 06:59:00	19.6	48.7	8.5
2020-08-10 07:14:00	19.6	48.8	8.5
2020-08-10 07:29:00	19.6	48.9	8.6
2020-08-10 07:44:00	19.7	49.1	8.7
2020-08-10 07:59:00	19.8	49	8.8
2020-08-10 08:14:00	19.9	48.9	8.8
2020-08-10 08:29:00	20.1	48.5	8.9
2020-08-10 08:44:00	20.4	47.7	8.9
2020-08-10 08:59:00	20.7	47	9
2020-08-10 09:14:00	21.2	46.1	9.1
2020-08-10 09:29:00	21.8	44.9	9.3
2020-08-10 09:44:00	21.9	44.7	9.3
2020-08-10 09:59:00	23.6	41.3	9.7
2020-08-10 10:14:00	24.7	39	9.8
2020-08-10 10:29:00	24.4	39.3	9.7
2020-08-10 10:44:00	25.6	37.6	10.1
2020-08-10 10:59:00	27.2	35.3	10.5
2020-08-10 11:14:00	28.4	33.4	10.8
2020-08-10 11:29:00	27.7	34.4	10.6
2020-08-10 11:44:00	28.3	34.1	11
2020-08-10 11:59:00	29.7	32	11.2
2020-08-10 12:14:00	30.4	30.7	11.2
2020-08-10 12:29:00	30.7	30.3	11.3
2020-08-10 12:44:00	28.8	32.8	10.8
2020-08-10 12:59:00	28.2	34.5	11.1
2020-08-10 13:14:00	29.4	33	11.4
2020-08-10 13:29:00	30.7	31.6	11.9
2020-08-10 13:44:00	29.7	32.9	11.7
2020-08-10 13:59:00	27.9	35.1	11.1
2020-08-10 14:14:00	26.7	37	10.8
2020-08-10 14:29:00	25.9	38.1	10.5
2020-08-10 14:44:00	25.5	38.9	10.5
2020-08-10 14:59:00	25.2	39.3	10.4
2020-08-10 15:14:00	24.9	39.6	10.2
2020-08-10 15:29:00	24.6	40.2	10.2
2020-08-10 15:44:00	24.4	40.8	10.2
2020-08-10 15:59:00	24.2	41.4	10.3
2020-08-10 16:14:00	23.9	41.9	10.2
2020-08-10 16:29:00	23.6	42.6	10.1
2020-08-10 16:44:00	23.4	42.9	10.1
2020-08-10 16:59:00	23.2	43.4	10.1
2020-08-10 17:14:00	22.9	44.1	10
2020-08-10 17:29:00	22.7	44.8	10.1
2020-08-10 17:44:00	22.4	45.4	10
2020-08-10 17:59:00	22.1	46.3	10
2020-08-10 18:14:00	21.9	46.9	10
2020-08-10 18:29:00	21.7	47.3	10
2020-08-10 18:44:00	21.5	47.9	10
2020-08-10 18:59:00	21.4	48.5	10.1
2020-08-10 19:14:00	21.2	48.9	10
2020-08-10 19:29:00	21.1	49.3	10.1
2020-08-10 19:44:00	21	49.5	10
2020-08-10 19:59:00	21	49.8	10.1
2020-08-10 20:14:00	21	50	10.2
2020-08-10 20:29:00	21	50.1	10.2
2020-08-10 20:44:00	21	50.2	10.2
2020-08-10 20:59:00	20.9	50.5	10.2
2020-08-10 21:14:00	20.9	50.6	10.3
2020-08-10 21:29:00	20.9	50.8	10.3
2020-08-10 21:44:00	20.8	50.9	10.3
2020-08-10 21:59:00	20.7	51.1	10.2
2020-08-10 22:14:00	20.7	51.2	10.3
2020-08-10 22:29:00	20.7	51.6	10.4
2020-08-10 22:44:00	20.6	51.9	10.4
2020-08-10 22:59:00	20.6	52.1	10.4
2020-08-10 23:14:00	20.5	52.3	10.4
2020-08-10 23:29:00	20.5	52.2	10.4
2020-08-10 23:44:00	20.4	52	10.2
2020-08-10 23:59:00	20.4	52	10.2
2020-08-11 00:14:00	20.3	51.9	10.1
2020-08-11 00:29:00	20.2	51.9	10
2020-08-11 00:44:00	20.2	51.9	10
2020-08-11 00:59:00	20.1	52	9.9
2020-08-11 01:14:00	20.1	52	9.9
2020-08-11 01:29:00	20	52.3	9.9
2020-08-11 01:44:00	19.9	52.3	9.8
2020-08-11 01:59:00	19.9	52.3	9.8
2020-08-11 02:14:00	19.8	52.4	9.8
2020-08-11 02:29:00	19.7	52.6	9.7
2020-08-11 02:44:00	19.7	52.6	9.7
2020-08-11 02:59:00	19.7	52.6	9.7
2020-08-11 03:14:00	19.6	52.5	9.6
2020-08-11 03:29:00	19.6	52.5	9.6
2020-08-11 03:44:00	19.5	52.6	9.5
2020-08-11 03:59:00	19.5	52.6	9.5
2020-08-11 04:14:00	19.4	52.7	9.5
2020-08-11 04:29:00	19.4	52.7	9.5
2020-08-11 04:44:00	19.4	52.6	9.5
2020-08-11 04:59:00	19.3	52.5	9.3
2020-08-11 05:14:00	19.3	52.3	9.3
2020-08-11 05:29:00	19.3	52.2	9.2
2020-08-11 05:44:00	19.2	52.2	9.2
2020-08-11 05:59:00	19.2	52.5	9.2
2020-08-11 06:14:00	19.2	52.6	9.3
2020-08-11 06:29:00	19.2	52.7	9.3
2020-08-11 06:44:00	19.1	52.8	9.2
2020-08-11 06:59:00	19	52.6	9.1
2020-08-11 07:14:00	19	52.4	9
2020-08-11 07:29:00	19	51.9	8.9
2020-08-11 07:44:00	19	50.9	8.6
2020-08-11 07:59:00	19.2	49.8	8.5
2020-08-11 08:14:00	19.4	48.7	8.3
2020-08-11 08:29:00	19.6	46.5	7.8
2020-08-11 08:44:00	19.9	43.7	7.2
2020-08-11 08:59:00	20.2	42.8	7.1
2020-08-11 09:14:00	20.9	43.8	8.1
2020-08-11 09:16:00	21	43.1	8
2020-08-11 09:31:00	21.1	48.1	9.7
2020-08-11 09:46:00	21.6	41.7	8
2020-08-11 10:01:00	22.4	39.9	8.1
2020-08-11 10:16:00	23.3	37.5	8
2020-08-11 10:31:00	24.2	35.6	8
2020-08-11 10:46:00	25.1	34.5	8.3
2020-08-11 11:01:00	25.5	34.7	8.8
2020-08-11 11:16:00	25.8	34	8.7
2020-08-11 11:31:00	26.1	33.6	8.8
2020-08-11 11:46:00	27.1	31.1	8.6
2020-08-11 12:01:00	27.8	26.6	6.9
2020-08-11 12:16:00	28.2	26.4	7.1
2020-08-11 12:31:00	28.7	27.4	8.1
2020-08-11 12:46:00	29	28.1	8.7
2020-08-11 13:01:00	29.3	30.6	10.2
2020-08-11 13:16:00	30	31.3	11.2
2020-08-11 13:31:00	30.8	31.2	11.8
2020-08-11 13:46:00	29.9	33.4	12.1
2020-08-11 14:01:00	27.9	36.9	11.8
2020-08-11 14:16:00	26.5	39.8	11.7
2020-08-11 14:31:00	25.7	41.8	11.7
2020-08-11 14:46:00	25.2	42.9	11.7
2020-08-11 15:01:00	24	46.7	11.9
2020-08-11 15:16:00	23.2	48.9	11.9
2020-08-11 15:31:00	22.7	50.6	11.9
2020-08-11 15:46:00	22.8	50.1	11.9
2020-08-11 16:01:00	22.8	49.9	11.8
2020-08-11 16:16:00	22.7	50.1	11.8
2020-08-11 16:31:00	22.6	50.5	11.8
2020-08-11 16:46:00	22.4	50.3	11.6
2020-08-11 17:01:00	22.3	50.5	11.5
2020-08-11 17:16:00	22	50.6	11.3
2020-08-11 17:31:00	21.8	50.7	11.1
2020-08-11 17:46:00	21.4	50.2	10.6
2020-08-11 18:01:00	21.2	51	10.7
2020-08-11 18:16:00	21.2	51.1	10.7
2020-08-11 18:31:00	21.2	51.2	10.7
2020-08-11 18:46:00	21.1	51.6	10.7
2020-08-11 19:01:00	21.1	51.8	10.8
2020-08-11 19:16:00	21	52	10.8
2020-08-11 19:31:00	20.9	52.4	10.8
2020-08-11 19:46:00	20.9	52.1	10.7
2020-08-11 20:01:00	20.8	52.5	10.7
2020-08-11 20:16:00	20.8	52.5	10.7
2020-08-11 20:31:00	20.7	52.6	10.7
2020-08-11 20:46:00	20.7	52.8	10.7
2020-08-11 21:01:00	20.6	52.8	10.6
2020-08-11 21:16:00	20.6	52.9	10.7
2020-08-11 21:31:00	20.5	52.6	10.5
2020-08-11 21:46:00	20.5	53	10.6
2020-08-11 22:01:00	20.5	52.9	10.6
2020-08-11 22:16:00	20.5	53.3	10.7
2020-08-11 22:31:00	20.4	53.8	10.7
2020-08-11 22:46:00	20.3	54.1	10.7
2020-08-11 23:01:00	20.2	54.6	10.8
2020-08-11 23:16:00	20.2	54.7	10.8
2020-08-11 23:31:00	20.2	54.8	10.8
2020-08-11 23:46:00	20.2	55.1	10.9
2020-08-12 00:01:00	20.1	55.2	10.8
2020-08-12 00:16:00	20.1	55.3	10.9
2020-08-12 00:31:00	20.1	55.1	10.8
2020-08-12 00:46:00	20	55.2	10.7
2020-08-12 01:01:00	19.9	55.2	10.6
2020-08-12 01:16:00	19.9	55.2	10.6
2020-08-12 01:31:00	19.9	55.3	10.7
2020-08-12 01:46:00	19.8	55.1	10.5
2020-08-12 02:01:00	19.7	55	10.4
2020-08-12 02:16:00	19.7	54.8	10.3
2020-08-12 02:31:00	19.6	54.6	10.2
2020-08-12 02:46:00	19.6	54.5	10.2
2020-08-12 03:01:00	19.5	54.4	10.1
2020-08-12 03:16:00	19.5	54.2	10
2020-08-12 03:31:00	19.4	54.2	9.9
2020-08-12 03:46:00	19.4	54.2	9.9
2020-08-12 04:01:00	19.4	54.1	9.9
2020-08-12 04:16:00	19.4	54.1	9.9
2020-08-12 04:31:00	19.3	54.1	9.8
2020-08-12 04:46:00	19.3	54.1	9.8
2020-08-12 05:01:00	19.3	53.8	9.7
2020-08-12 05:16:00	19.2	53.7	9.6
2020-08-12 05:31:00	19.2	53.5	9.5
2020-08-12 05:46:00	19.2	53.3	9.5
2020-08-12 06:01:00	19.1	53.1	9.3
2020-08-12 06:16:00	19.1	52.8	9.2
2020-08-12 06:31:00	19	52.6	9.1
2020-08-12 06:46:00	19	52.5	9.1
2020-08-12 07:01:00	18.9	52.5	9
2020-08-12 07:16:00	18.9	52.2	8.9
2020-08-12 07:31:00	18.9	52	8.8
2020-08-12 07:46:00	18.9	51.6	8.7
2020-08-12 08:01:00	19.1	51.1	8.7
2020-08-12 08:16:00	19.4	50.1	8.7
2020-08-12 08:31:00	19.6	48.7	8.5
2020-08-12 08:46:00	19.8	48	8.5
2020-08-12 09:01:00	20.1	47.4	8.6
2020-08-12 09:16:00	20.5	47.1	8.8
2020-08-12 09:31:00	21.3	45.7	9.1
2020-08-12 09:46:00	22.4	43.7	9.4
2020-08-12 10:01:00	23.7	40.7	9.6
2020-08-12 10:16:00	24.8	38.8	9.8
2020-08-12 10:31:00	25.6	37.2	9.9
2020-08-12 10:46:00	26.2	35.2	9.6
2020-08-12 11:01:00	26.7	33.2	9.2
2020-08-12 11:16:00	27.3	31.7	9
2020-08-12 11:31:00	28	30.3	9
2020-08-12 11:46:00	28.4	28.7	8.5
2020-08-12 12:01:00	29	28	8.6
2020-08-12 12:16:00	29.4	27.2	8.6
2020-08-12 12:31:00	29.8	26.6	8.6
2020-08-12 12:46:00	30.2	26.3	8.7
2020-08-12 13:01:00	30.6	25.8	8.8
2020-08-12 13:16:00	31.2	25.5	9.1
2020-08-12 13:31:00	31.5	25.5	9.4
2020-08-12 13:46:00	30.3	26.8	9.1
2020-08-12 14:01:00	28.3	29.6	8.9
2020-08-12 14:16:00	26.9	31.7	8.7
2020-08-12 14:31:00	26	33.3	8.6
2020-08-12 14:46:00	25.5	34.3	8.6
2020-08-12 15:01:00	25.2	34.9	8.6
2020-08-12 15:16:00	24.9	35.7	8.7
2020-08-12 15:31:00	24.7	36.1	8.7
2020-08-12 15:46:00	24.5	36.9	8.8
2020-08-12 16:01:00	24.3	37.4	8.8
2020-08-12 16:16:00	24.1	38	8.9
2020-08-12 16:31:00	23.8	38.5	8.8
2020-08-12 16:46:00	23.6	39.1	8.9
2020-08-12 17:01:00	23.3	39.7	8.8
2020-08-12 17:16:00	23.1	40.3	8.9
2020-08-12 17:31:00	22.8	40.9	8.8
2020-08-12 17:46:00	22.5	41.5	8.8
2020-08-12 18:01:00	22.2	42.2	8.7
2020-08-12 18:16:00	22	42.8	8.8
2020-08-12 18:31:00	21.8	43.2	8.7
2020-08-12 18:46:00	21.7	43.7	8.8
2020-08-12 19:01:00	21.6	44.2	8.9
2020-08-12 19:16:00	21.6	44.5	9
2020-08-12 19:31:00	21.5	44.8	9
2020-08-12 19:46:00	21.4	45.1	9
2020-08-12 20:01:00	21.4	45.5	9.1
2020-08-12 20:16:00	21.3	45.9	9.2
2020-08-12 20:31:00	21.2	46.2	9.2
2020-08-12 20:46:00	21.2	46.5	9.3
2020-08-12 21:01:00	21.1	46.8	9.3
2020-08-12 21:16:00	21.1	47.1	9.4
2020-08-12 21:31:00	21	47.5	9.4
2020-08-12 21:46:00	20.9	48	9.5
2020-08-12 22:01:00	20.8	48.2	9.4
2020-08-12 22:16:00	20.8	48.4	9.5
2020-08-12 22:31:00	20.7	48	9.3
2020-08-12 22:46:00	20.7	47.7	9.2
2020-08-12 23:01:00	20.6	47.5	9
2020-08-12 23:16:00	20.6	47.5	9
2020-08-12 23:31:00	20.6	47.1	8.9
2020-08-12 23:46:00	20.6	46.7	8.8
2020-08-13 00:01:00	20.6	46.2	8.6
2020-08-13 00:16:00	20.5	45.9	8.4
2020-08-13 00:31:00	20.5	46.5	8.6
2020-08-13 00:46:00	20.5	47.3	8.9
2020-08-13 01:01:00	20.5	48.9	9.4
2020-08-13 01:16:00	20.4	50	9.6
2020-08-13 01:31:00	20.3	50.1	9.6
2020-08-13 01:46:00	20.3	50.5	9.7
2020-08-13 02:01:00	20.3	50.9	9.8
2020-08-13 02:16:00	20.2	51.5	9.9
2020-08-13 02:31:00	20.2	51.7	9.9
2020-08-13 02:46:00	20.1	51.4	9.8
2020-08-13 03:01:00	20.1	51.3	9.7
2020-08-13 03:16:00	20.1	50.8	9.6
2020-08-13 03:31:00	20.1	51.2	9.7
2020-08-13 03:46:00	20	52.7	10
2020-08-13 04:01:00	19.9	53.3	10.1
2020-08-13 04:16:00	19.8	53.6	10.1
2020-08-13 04:31:00	19.8	53.8	10.2
2020-08-13 04:46:00	19.8	53.8	10.2
2020-08-13 05:01:00	19.7	54	10.1
2020-08-13 05:16:00	19.7	54.2	10.2
2020-08-13 05:31:00	19.7	54.4	10.2
2020-08-13 05:46:00	19.6	54.4	10.1
2020-08-13 06:01:00	19.5	54.7	10.1
2020-08-13 06:16:00	19.5	55.1	10.2
2020-08-13 06:31:00	19.4	55.6	10.3
2020-08-13 06:46:00	19.4	56	10.4
2020-08-13 07:01:00	19.3	55.9	10.3
2020-08-13 07:16:00	19.3	55.5	10.2
2020-08-13 07:31:00	19.2	54.8	9.9
2020-08-13 07:46:00	19.3	54	9.8
2020-08-13 08:01:00	19.3	53.2	9.5
2020-08-13 08:16:00	19.5	51.8	9.3
2020-08-13 08:31:00	19.6	50.4	9
2020-08-13 08:46:00	19.7	49.8	8.9
2020-08-13 09:01:00	19.8	49.6	9
2020-08-13 09:16:00	19.8	49.8	9
2020-08-13 09:31:00	20.1	49.3	9.1
2020-08-13 09:46:00	20.2	49.3	9.2
2020-08-13 10:01:00	20.3	49	9.2
2020-08-13 10:16:00	20.3	49.3	9.3
2020-08-13 10:31:00	20.4	49.3	9.4
2020-08-13 10:46:00	20.6	49	9.5
2020-08-13 11:01:00	21.3	47.8	9.8
2020-08-13 11:16:00	23.6	43	10.3
2020-08-13 11:31:00	24.6	40.8	10.4
2020-08-13 11:46:00	23.4	42.9	10.1
2020-08-13 12:01:00	22.4	44.6	9.7
2020-08-13 12:16:00	22.1	45	9.6
2020-08-13 12:31:00	23	42.9	9.7
2020-08-13 12:46:00	22.5	44	9.6
2020-08-13 13:01:00	23.6	42.2	10
2020-08-13 13:16:00	23.1	42.9	9.8
2020-08-13 13:31:00	23.3	42.7	9.9
2020-08-13 13:46:00	23.5	42.4	10
2020-08-13 14:01:00	23.4	42.6	10
2020-08-13 14:16:00	23.2	42.6	9.8
2020-08-13 14:31:00	22.9	42.9	9.6
2020-08-13 14:46:00	22.8	42.9	9.5
2020-08-13 15:01:00	22.5	43.3	9.4
2020-08-13 15:16:00	22.3	43.8	9.4
2020-08-13 15:31:00	22.3	43.7	9.4
2020-08-13 15:46:00	22.2	43.6	9.2
2020-08-13 16:01:00	22.1	43.4	9.1
2020-08-13 16:16:00	21.9	43.6	9
2020-08-13 16:31:00	21.8	43.9	9
2020-08-13 16:46:00	21.6	44.3	8.9
2020-08-13 17:01:00	21.4	44.8	8.9
2020-08-13 17:16:00	21.2	45.3	8.9
2020-08-13 17:31:00	21	45.5	8.8
2020-08-13 17:46:00	20.8	45.9	8.7
2020-08-13 18:01:00	20.6	46.7	8.8
2020-08-13 18:16:00	20.5	47	8.8
2020-08-13 18:31:00	20.3	47.6	8.8
2020-08-13 18:46:00	20.2	47.9	8.8
2020-08-13 19:01:00	20.1	48.3	8.8
2020-08-13 19:16:00	20.1	48.8	9
2020-08-13 19:31:00	20	49	9
2020-08-13 19:46:00	19.9	49.2	8.9
2020-08-13 20:01:00	19.9	49.4	9
2020-08-13 20:16:00	19.8	49.6	9
2020-08-13 20:31:00	19.7	49.8	8.9
2020-08-13 20:46:00	19.7	49.9	8.9
2020-08-13 21:01:00	19.7	50.1	9
2020-08-13 21:16:00	19.6	50.2	8.9
2020-08-13 21:31:00	19.6	50.4	9
2020-08-13 21:46:00	19.5	50.7	9
2020-08-13 22:01:00	19.5	51.1	9.1
2020-08-13 22:16:00	19.4	51.4	9.1
2020-08-13 22:31:00	19.4	51.8	9.2
2020-08-13 22:46:00	19.3	52.2	9.2
2020-08-13 23:01:00	19.3	52.6	9.4
2020-08-13 23:16:00	19.2	53	9.4
2020-08-13 23:31:00	19.2	53.2	9.4
2020-08-13 23:46:00	19.1	53.5	9.4
2020-08-14 00:01:00	19	53.7	9.4
2020-08-14 00:16:00	19	53.7	9.4
2020-08-14 00:31:00	19	53.9	9.4
2020-08-14 00:46:00	18.9	54	9.4
2020-08-14 01:01:00	18.9	53.9	9.4
2020-08-14 01:16:00	18.8	53.9	9.3
2020-08-14 01:31:00	18.8	53.9	9.3
2020-08-14 01:46:00	18.7	53.7	9.1
2020-08-14 02:01:00	18.7	53.7	9.1
2020-08-14 02:16:00	18.6	53.6	9
2020-08-14 02:31:00	18.6	53.6	9
2020-08-14 02:46:00	18.5	53.6	8.9
2020-08-14 03:01:00	18.4	53.6	8.8
2020-08-14 03:16:00	18.4	53.6	8.8
2020-08-14 03:31:00	18.4	53.7	8.8
2020-08-14 03:46:00	18.3	53.7	8.7
2020-08-14 04:01:00	18.3	53.8	8.8
2020-08-14 04:16:00	18.2	53.8	8.7
2020-08-14 04:31:00	18.2	53.8	8.7
2020-08-14 04:46:00	18.1	53.8	8.6
2020-08-14 05:01:00	18.1	53.8	8.6
2020-08-14 05:16:00	18	53.9	8.5
2020-08-14 05:31:00	18	53.9	8.5
2020-08-14 05:46:00	18	54	8.5
2020-08-14 06:01:00	18	54	8.5
2020-08-14 06:16:00	17.9	54	8.5
2020-08-14 06:31:00	17.9	53.9	8.4
2020-08-14 06:46:00	17.8	54	8.4
2020-08-14 07:01:00	17.8	54	8.4
2020-08-14 07:16:00	17.8	54	8.4
2020-08-14 07:31:00	17.8	54	8.4
2020-08-14 07:46:00	17.9	53.8	8.4
2020-08-14 08:01:00	18.1	53.5	8.5
2020-08-14 08:16:00	18.4	53.1	8.7
2020-08-14 08:31:00	18.7	52.5	8.8
2020-08-14 08:46:00	19.1	51.7	8.9
2020-08-14 09:01:00	19.4	50.7	8.9
2020-08-14 09:16:00	19.9	50.1	9.2
2020-08-14 09:31:00	20.6	48.7	9.4
2020-08-14 09:46:00	21.5	46.9	9.7
2020-08-14 10:01:00	22.8	44.4	10
2020-08-14 10:16:00	24	41.9	10.3
2020-08-14 10:31:00	25	40.2	10.5
2020-08-14 10:46:00	25.8	38.9	10.8
2020-08-14 11:01:00	26.4	37.9	10.9
2020-08-14 11:16:00	27	37.1	11.1
2020-08-14 11:31:00	27.7	36	11.3
2020-08-14 11:46:00	28.4	35.3	11.6
2020-08-14 12:01:00	29	34.5	11.8
2020-08-14 12:16:00	29.5	33.5	11.8
2020-08-14 12:31:00	29.8	33.1	11.8
2020-08-14 12:46:00	30.1	32.7	11.9
2020-08-14 13:01:00	30.6	32.1	12.1
2020-08-14 13:16:00	31.2	31.5	12.3
2020-08-14 13:31:00	31.5	31.1	12.4
2020-08-14 13:46:00	30.2	32.9	12.1
2020-08-14 14:01:00	28.3	35.6	11.6
2020-08-14 14:16:00	27	37.5	11.3
2020-08-14 14:31:00	26.2	38.9	11.1
2020-08-14 14:46:00	25.7	39.9	11
2020-08-14 15:01:00	25.3	40.6	10.9
2020-08-14 15:16:00	25	41.3	10.9
2020-08-14 15:31:00	24.7	41.9	10.9
2020-08-14 15:46:00	24.4	42.4	10.8
2020-08-14 16:01:00	24.2	43	10.8
2020-08-14 16:16:00	23.9	43.5	10.7
2020-08-14 16:31:00	23.6	44.2	10.7
2020-08-14 16:46:00	23.3	44.7	10.6
2020-08-14 17:01:00	23	45.4	10.6
2020-08-14 17:16:00	22.8	46.1	10.6
2020-08-14 17:31:00	22.5	46.6	10.5
2020-08-14 17:46:00	22.2	47.3	10.4
2020-08-14 18:01:00	21.9	47.9	10.4
2020-08-14 18:16:00	21.7	48.4	10.3
2020-08-14 18:31:00	21.6	48.8	10.4
2020-08-14 18:46:00	21.4	49.2	10.3
2020-08-14 19:01:00	21.3	49.4	10.3
2020-08-14 19:16:00	21.3	49.6	10.3
2020-08-14 19:31:00	21.2	49.5	10.2
2020-08-14 19:46:00	21.2	49.7	10.3
2020-08-14 20:01:00	21.1	49.8	10.2
2020-08-14 20:16:00	21.1	50.1	10.3
2020-08-14 20:31:00	21	50.1	10.2
2020-08-14 20:46:00	21	50.2	10.2
2020-08-14 21:01:00	20.9	50.4	10.2
2020-08-14 21:16:00	20.9	50.6	10.3
2020-08-14 21:31:00	20.8	50.6	10.2
2020-08-14 21:46:00	20.7	50.9	10.2
2020-08-14 22:01:00	20.7	51.1	10.2
2020-08-14 22:16:00	20.6	51.2	10.2
2020-08-14 22:31:00	20.5	51.4	10.1
2020-08-14 22:46:00	20.5	51.3	10.1
2020-08-14 23:01:00	20.4	51.4	10
2020-08-14 23:16:00	20.3	51.4	9.9
2020-08-14 23:31:00	20.2	51.3	9.8
2020-08-14 23:46:00	20.1	51.2	9.7
2020-08-15 00:01:00	20	51.2	9.6
2020-08-15 00:16:00	19.9	51	9.5
2020-08-15 00:31:00	19.9	50.9	9.4
2020-08-15 00:46:00	19.8	50.8	9.3
2020-08-15 01:01:00	19.7	50.6	9.2
2020-08-15 01:16:00	19.7	50.6	9.2
2020-08-15 01:31:00	19.6	50.4	9
2020-08-15 01:46:00	19.5	50.4	8.9
2020-08-15 02:01:00	19.5	50.4	8.9
2020-08-15 02:16:00	19.4	50.4	8.8
2020-08-15 02:31:00	19.4	50.4	8.8
2020-08-15 02:46:00	19.3	50.2	8.7
2020-08-15 03:01:00	19.3	50.1	8.6
2020-08-15 03:16:00	19.2	49.9	8.5
2020-08-15 03:31:00	19.2	49.8	8.5
2020-08-15 03:46:00	19.1	49.7	8.3
2020-08-15 04:01:00	19.1	49.5	8.3
2020-08-15 04:16:00	19	49.4	8.2
2020-08-15 04:31:00	19	49.3	8.1
2020-08-15 04:46:00	19	49.1	8.1
2020-08-15 05:01:00	19	49.1	8.1
2020-08-15 05:16:00	19	49.1	8.1
2020-08-15 05:31:00	18.9	49.3	8
2020-08-15 05:46:00	18.9	49.3	8
2020-08-15 06:01:00	18.9	49.4	8.1
2020-08-15 06:16:00	18.9	49.9	8.2
2020-08-15 06:31:00	18.9	50.2	8.3
2020-08-15 06:46:00	18.9	50.7	8.4
2020-08-15 07:01:00	18.9	51.1	8.6
2020-08-15 07:16:00	18.8	51.5	8.6
2020-08-15 07:31:00	18.9	51.6	8.7
2020-08-15 07:46:00	19	51.4	8.7
2020-08-15 08:01:00	19.2	50.7	8.7
2020-08-15 08:16:00	19.4	49.7	8.6
2020-08-15 08:31:00	19.6	49.2	8.6
2020-08-15 08:46:00	19.9	48.6	8.7
2020-08-15 09:01:00	20.1	48.2	8.8
2020-08-15 09:16:00	20.5	47.3	8.9
2020-08-15 09:31:00	21.1	45.2	8.8
2020-08-15 09:46:00	21.8	43.9	9
2020-08-15 10:01:00	22.6	42.8	9.3
2020-08-15 10:16:00	23.4	42.6	10
2020-08-15 10:31:00	23.8	42.4	10.3
2020-08-15 10:46:00	23.8	43	10.5
2020-08-15 11:01:00	24	42.7	10.5
2020-08-15 11:16:00	24.7	41.5	10.7
2020-08-15 11:31:00	25.9	39.7	11.1
2020-08-15 11:46:00	26.7	38.2	11.3
2020-08-15 12:01:00	26.5	38.4	11.2
2020-08-15 12:16:00	25.7	40.8	11.4
2020-08-15 12:31:00	26.8	38.9	11.6
2020-08-15 12:46:00	27.8	37.3	11.9
2020-08-15 13:01:00	28.4	36.6	12.1
2020-08-15 13:16:00	27.8	37.1	11.8
2020-08-15 13:31:00	28.2	36.1	11.8
2020-08-15 13:46:00	27.1	37.5	11.4
2020-08-15 14:01:00	25.8	39.9	11.1
2020-08-15 14:16:00	24.3	43	10.9
2020-08-15 14:31:00	23.3	45.6	10.9
2020-08-15 14:46:00	22.6	47.6	10.9
2020-08-15 15:01:00	22.1	49.3	11
2020-08-15 15:16:00	21.7	50.1	10.8
2020-08-15 15:31:00	21.4	50.7	10.8
2020-08-15 15:46:00	21.3	51.2	10.8
2020-08-15 16:01:00	21.2	51.5	10.8
2020-08-15 16:16:00	21	51.8	10.7
2020-08-15 16:31:00	20.9	52	10.7
2020-08-15 16:46:00	20.8	52	10.6
2020-08-15 17:01:00	20.7	52.1	10.5
2020-08-15 17:16:00	20.6	52.4	10.5
2020-08-15 17:31:00	20.5	52.4	10.4
2020-08-15 17:46:00	20.3	52.8	10.3
2020-08-15 18:01:00	20.2	53.2	10.4
2020-08-15 18:16:00	20	53.4	10.2
2020-08-15 18:31:00	19.9	53.6	10.2
2020-08-15 18:46:00	19.8	53.6	10.1
2020-08-15 19:01:00	19.7	53.2	9.9
2020-08-15 19:16:00	19.6	53.2	9.8
2020-08-15 19:31:00	19.5	53.1	9.7
2020-08-15 19:46:00	19.4	53.2	9.6
2020-08-15 20:01:00	19.3	53.2	9.5
2020-08-15 20:16:00	19.2	53.3	9.5
2020-08-15 20:31:00	19.1	53.3	9.4
2020-08-15 20:46:00	19	53.5	9.3
2020-08-15 21:01:00	19	53.5	9.3
2020-08-15 21:16:00	18.9	53.4	9.2
2020-08-15 21:31:00	18.9	53.3	9.2
2020-08-15 21:46:00	18.8	53.4	9.1
2020-08-15 22:01:00	18.8	53.3	9.1
2020-08-15 22:16:00	18.7	53.3	9
2020-08-15 22:31:00	18.7	53.1	8.9
2020-08-15 22:46:00	18.7	53	8.9
2020-08-15 23:01:00	18.6	52.9	8.8
2020-08-15 23:16:00	18.6	52.6	8.7
2020-08-15 23:31:00	18.5	52.6	8.6
2020-08-15 23:46:00	18.5	52.5	8.6
2020-08-16 00:01:00	18.4	52.2	8.4
2020-08-16 00:16:00	18.4	51.9	8.3
2020-08-16 00:31:00	18.3	51.5	8.1
2020-08-16 00:46:00	18.3	51.3	8.1
2020-08-16 01:01:00	18.2	51	7.9
2020-08-16 01:16:00	18.2	50.8	7.8
2020-08-16 01:31:00	18.1	50.6	7.7
2020-08-16 01:46:00	18	50.5	7.6
2020-08-16 02:01:00	18	50.2	7.5
2020-08-16 02:16:00	17.9	49.8	7.3
2020-08-16 02:31:00	17.8	49.4	7.1
2020-08-16 02:46:00	17.8	48.9	6.9
2020-08-16 03:01:00	17.8	48.2	6.7
2020-08-16 03:16:00	17.7	47.5	6.4
2020-08-16 03:31:00	17.7	47.1	6.3
2020-08-16 03:46:00	17.6	46.6	6
2020-08-16 04:01:00	17.6	46.3	5.9
2020-08-16 04:16:00	17.6	45.7	5.7
2020-08-16 04:31:00	17.5	45.4	5.6
2020-08-16 04:46:00	17.5	45.4	5.6
2020-08-16 05:01:00	17.5	45.7	5.6
2020-08-16 05:16:00	17.5	46.1	5.8
2020-08-16 05:31:00	17.5	46.6	5.9
2020-08-16 05:46:00	17.4	47.1	6
2020-08-16 06:01:00	17.4	47.7	6.2
2020-08-16 06:16:00	17.3	48.4	6.3
2020-08-16 06:31:00	17.3	48.7	6.4
2020-08-16 06:46:00	17.2	48.7	6.3
2020-08-16 07:01:00	17.2	48.3	6.2
2020-08-16 07:16:00	17.1	47.7	5.9
2020-08-16 07:31:00	17.1	46.8	5.6
2020-08-16 07:46:00	17.2	46.3	5.6
2020-08-16 08:01:00	17.4	46	5.7
2020-08-16 08:16:00	17.5	45.5	5.6
2020-08-16 08:31:00	17.6	45.3	5.6
2020-08-16 08:46:00	17.7	44.8	5.5
2020-08-16 09:01:00	17.8	44.6	5.6
2020-08-16 09:16:00	18.2	43.9	5.7
2020-08-16 09:31:00	18.9	43.2	6.1
2020-08-16 09:46:00	19.8	41.6	6.4
2020-08-16 10:01:00	20.8	39.8	6.6
2020-08-16 10:16:00	21.9	37.9	6.9
2020-08-16 10:31:00	21.6	38.4	6.8
2020-08-16 10:46:00	20.7	40.5	6.8
2020-08-16 11:01:00	20.5	41.5	7
2020-08-16 11:16:00	21.4	40.9	7.6
2020-08-16 11:31:00	21.6	40.9	7.7
2020-08-16 11:46:00	22.1	40.4	8
2020-08-16 12:01:00	24.1	37.2	8.6
2020-08-16 12:16:00	24.1	37.3	8.6
2020-08-16 12:31:00	23.1	39.3	8.5
2020-08-16 12:46:00	23.8	38.3	8.7
2020-08-16 13:01:00	24.3	37.4	8.8
2020-08-16 13:16:00	26	35	9.3
2020-08-16 13:31:00	26.6	33.9	9.4
2020-08-16 13:46:00	25.3	35.7	9
2020-08-16 14:01:00	23.5	38.4	8.5
2020-08-16 14:16:00	22	41.7	8.4
2020-08-16 14:31:00	21.6	42.9	8.4
2020-08-16 14:46:00	21.6	43.5	8.6
2020-08-16 15:01:00	21.4	44	8.6
2020-08-16 15:16:00	21.2	44.4	8.6
2020-08-16 15:31:00	21.1	44.5	8.5
2020-08-16 15:46:00	20.8	45	8.4
2020-08-16 16:01:00	20.5	45.6	8.3
2020-08-16 16:16:00	20.2	46.3	8.3
2020-08-16 16:31:00	19.9	46.9	8.2
2020-08-16 16:46:00	19.6	47.7	8.2
2020-08-16 17:01:00	19.4	48.2	8.2
2020-08-16 17:16:00	19.3	48.7	8.2
2020-08-16 17:31:00	19.1	49.2	8.2
2020-08-16 17:46:00	19	49.7	8.2
2020-08-16 18:01:00	18.9	50.2	8.3
2020-08-16 18:16:00	18.7	50.6	8.2
2020-08-16 18:31:00	18.6	51	8.3
2020-08-16 18:46:00	18.4	51.2	8.1
2020-08-16 19:01:00	18.4	51.4	8.2
2020-08-16 19:16:00	18.3	51.5	8.1
2020-08-16 19:31:00	18.1	51.8	8
2020-08-16 19:46:00	18	52	8
2020-08-16 20:01:00	18	52.3	8.1
2020-08-16 20:16:00	17.9	52.4	8
2020-08-16 20:31:00	17.8	52.4	7.9
2020-08-16 20:46:00	17.8	52.7	8
2020-08-16 21:01:00	17.7	52.8	7.9
2020-08-16 21:16:00	17.7	52.8	7.9
2020-08-16 21:31:00	17.7	52.9	8
2020-08-16 21:46:00	17.6	52.9	7.9
2020-08-16 22:01:00	17.5	52.8	7.8
2020-08-16 22:16:00	17.5	52.8	7.8
2020-08-16 22:31:00	17.4	52.7	7.6
2020-08-16 22:46:00	17.4	52.6	7.6
2020-08-16 23:01:00	17.4	52.4	7.5
2020-08-16 23:16:00	17.3	52.3	7.4
2020-08-16 23:31:00	17.3	52.3	7.4
2020-08-16 23:46:00	17.3	52.4	7.5
2020-08-17 00:01:00	17.3	52.6	7.5
2020-08-17 00:16:00	17.2	52.6	7.4
2020-08-17 00:31:00	17.1	52.6	7.3
2020-08-17 00:46:00	17.1	52.3	7.2
2020-08-17 01:01:00	17	52.1	7.1
2020-08-17 01:16:00	17	51.8	7
2020-08-17 01:31:00	17	51.4	6.9
2020-08-17 01:46:00	16.9	51.1	6.7
2020-08-17 02:01:00	16.9	50.6	6.6
2020-08-17 02:16:00	16.9	50.4	6.5
2020-08-17 02:31:00	16.8	50	6.3
2020-08-17 02:46:00	16.8	49.7	6.2
2020-08-17 03:01:00	16.8	49.6	6.2
2020-08-17 03:16:00	16.7	49.5	6.1
2020-08-17 03:31:00	16.7	49.3	6
2020-08-17 03:46:00	16.6	49.2	5.9
2020-08-17 04:01:00	16.5	49.2	5.8
2020-08-17 04:16:00	16.4	49.2	5.7
2020-08-17 04:31:00	16.4	49	5.6
2020-08-17 04:46:00	16.3	48.9	5.5
2020-08-17 05:01:00	16.3	48.8	5.5
2020-08-17 05:16:00	16.3	48.5	5.4
2020-08-17 05:31:00	16.2	48.2	5.2
2020-08-17 05:46:00	16.2	48.2	5.2
2020-08-17 06:01:00	16.2	47.8	5.1
2020-08-17 06:16:00	16.1	47.7	5
2020-08-17 06:31:00	16.1	47.5	4.9
2020-08-17 06:46:00	16	47.4	4.8
2020-08-17 07:01:00	16	47.2	4.7
2020-08-17 07:16:00	16	47.1	4.7
2020-08-17 07:31:00	16	46.8	4.6
2020-08-17 07:46:00	16	46.5	4.5
2020-08-17 08:01:00	16.1	46.2	4.5
2020-08-17 08:16:00	16.3	46.1	4.7
2020-08-17 08:31:00	16.6	45.8	4.9
2020-08-17 08:46:00	17	45.1	5
2020-08-17 09:01:00	17.5	44.3	5.2
2020-08-17 09:16:00	17.8	43.5	5.2
2020-08-17 09:31:00	18.1	42.8	5.2
2020-08-17 09:46:00	18.2	42.6	5.3
2020-08-17 10:01:00	18.3	42.5	5.3
2020-08-17 10:16:00	18.4	42.6	5.5
2020-08-17 10:31:00	18.4	42.8	5.5
2020-08-17 10:46:00	18.5	42.7	5.6
2020-08-17 11:01:00	18.7	42.4	5.7
2020-08-17 11:16:00	18.7	42.7	5.8
2020-08-17 11:31:00	19	42.3	5.9
2020-08-17 11:46:00	19	42.4	5.9
2020-08-17 12:01:00	19.8	41	6.2
2020-08-17 12:16:00	20.6	39.6	6.4
2020-08-17 12:31:00	20.2	40.1	6.2
2020-08-17 12:46:00	19.8	40.6	6
2020-08-17 13:01:00	19.6	40.6	5.8
2020-08-17 13:16:00	19.5	40.9	5.9
2020-08-17 13:31:00	19.3	41.2	5.8
2020-08-17 13:46:00	19.1	40.8	5.5
2020-08-17 14:01:00	19	39.8	5
2020-08-17 14:16:00	18.9	39.3	4.7
2020-08-17 14:31:00	18.9	38.9	4.6
2020-08-17 14:46:00	18.8	38.3	4.3
2020-08-17 15:01:00	18.7	38.1	4.1
2020-08-17 15:16:00	18.6	37.8	3.9
2020-08-17 15:31:00	18.6	37.4	3.8
2020-08-17 15:46:00	18.5	37.1	3.6
2020-08-17 16:01:00	18.4	37.3	3.5
2020-08-17 16:16:00	18.3	37.2	3.4
2020-08-17 16:31:00	18.3	37.2	3.4
2020-08-17 16:46:00	18.3	37.4	3.5
2020-08-17 17:01:00	18.3	37.5	3.5
2020-08-17 17:16:00	18.2	37.8	3.6
2020-08-17 17:31:00	18.1	38.2	3.6
2020-08-17 17:46:00	18	38.5	3.6
2020-08-17 18:01:00	17.9	38.9	3.7
2020-08-17 18:16:00	17.8	39.5	3.8
2020-08-17 18:31:00	17.8	39.9	4
2020-08-17 18:46:00	17.8	40.1	4
2020-08-17 19:01:00	17.7	40.6	4.1
2020-08-17 19:16:00	17.7	41.3	4.4
2020-08-17 19:31:00	17.7	42.1	4.6
2020-08-17 19:46:00	17.6	42.9	4.8
2020-08-17 20:01:00	17.6	43.7	5.1
2020-08-17 20:16:00	17.6	44.1	5.2
2020-08-17 20:31:00	17.6	44.4	5.3
2020-08-17 20:46:00	17.6	45.1	5.5
2020-08-17 21:01:00	17.5	47.3	6.1
2020-08-17 21:16:00	17.4	49.3	6.7
2020-08-17 21:31:00	17.3	51	7.1
2020-08-17 21:46:00	17.2	52.2	7.3
2020-08-17 22:01:00	17.2	52.9	7.5
2020-08-17 22:16:00	17.1	53.7	7.6
2020-08-17 22:31:00	17	53.9	7.6
2020-08-17 22:46:00	17	53.9	7.6
2020-08-17 23:01:00	16.9	53.9	7.5
2020-08-17 23:16:00	16.9	53.6	7.4
2020-08-17 23:31:00	16.8	53.2	7.2
2020-08-17 23:46:00	16.8	52.5	7
2020-08-18 00:01:00	16.7	52.1	6.8
2020-08-18 00:16:00	16.7	52	6.8
2020-08-18 00:31:00	16.6	51.8	6.6
2020-08-18 00:46:00	16.6	51.8	6.6
2020-08-18 01:01:00	16.5	51.8	6.5
2020-08-18 01:16:00	16.4	51.8	6.5
2020-08-18 01:31:00	16.4	52.2	6.6
2020-08-18 01:46:00	16.2	52.4	6.4
2020-08-18 02:01:00	16.2	52.4	6.4
2020-08-18 02:16:00	16.1	52.3	6.3
2020-08-18 02:31:00	16.1	51.9	6.2
2020-08-18 02:46:00	16	51.5	6
2020-08-18 03:01:00	16	51.5	6
2020-08-18 03:16:00	15.9	51.4	5.9
2020-08-18 03:31:00	15.8	51.2	5.7
2020-08-18 03:46:00	15.7	51.5	5.7
2020-08-18 04:01:00	15.6	51.9	5.7
2020-08-18 04:16:00	15.6	52	5.8
2020-08-18 04:31:00	15.5	51.8	5.6
2020-08-18 04:46:00	15.4	51.2	5.4
2020-08-18 05:01:00	15.4	50.7	5.2
2020-08-18 05:16:00	15.3	50.7	5.1
2020-08-18 05:31:00	15.2	50.9	5.1
2020-08-18 05:46:00	15.1	51.1	5.1
2020-08-18 06:01:00	15	51.1	5
2020-08-18 06:16:00	15	51.1	5
2020-08-18 06:31:00	14.9	50.9	4.8
2020-08-18 06:46:00	14.9	50.8	4.8
2020-08-18 07:01:00	14.8	50.6	4.6
2020-08-18 07:16:00	14.8	50.3	4.6
2020-08-18 07:31:00	14.8	50.1	4.5
2020-08-18 07:46:00	14.8	50.1	4.5
2020-08-18 08:01:00	14.8	50.1	4.5
2020-08-18 08:16:00	15	49.8	4.6
2020-08-18 08:31:00	15.2	49.4	4.7
2020-08-18 08:46:00	15.6	48.9	4.9
2020-08-18 09:01:00	15.9	48.3	5
2020-08-18 09:16:00	15.9	47.7	4.8
2020-08-18 09:31:00	15.9	47.7	4.8
2020-08-18 09:46:00	15.9	48	4.9
2020-08-18 09:42:00	16.2	46.1	4.6
2020-08-18 09:57:00	16.3	49.3	5.6
2020-08-18 10:12:00	16.4	46.1	4.8
2020-08-18 10:27:00	16.7	46.3	5.1
2020-08-18 10:42:00	17.6	44.8	5.5
2020-08-18 10:57:00	18.3	43.8	5.8
2020-08-18 11:12:00	20.1	40.8	6.4
2020-08-18 11:27:00	21.1	39.1	6.6
2020-08-18 11:42:00	20.9	39.8	6.7
2020-08-18 11:57:00	19.4	42.8	6.4
2020-08-18 12:12:00	18.2	49.9	7.6
2020-08-18 12:27:00	18.3	47.2	6.8
[truncated: 2,004 more rows]

## Sheet: SDDTemp
Timestamp	Temperature	Relative Humidity	Dew Point(°C)
2021-01-11 12:05:00	25.2	65.4	18.2
2021-01-11 12:07:00	25.3	64.6	18.1
2021-01-11 12:09:00	25.5	63.9	18.2
2021-01-11 12:11:00	25.7	63.1	18.2
2021-01-11 12:13:00	25.8	63.7	18.4
2021-01-11 12:15:00	25.9	63.2	18.4
2021-01-11 12:17:00	26	62.9	18.4
2021-01-11 12:19:00	26	63.2	18.5
2021-01-11 12:21:00	26.1	62.9	18.5
2021-01-11 12:23:00	26.2	62.5	18.5
2021-01-11 12:25:00	26.2	62.1	18.4
2021-01-11 12:27:00	26.3	62	18.4
2021-01-11 12:29:00	26.4	61.7	18.5
2021-01-11 12:31:00	26.4	61.4	18.4
2021-01-11 12:33:00	26.4	61.8	18.5
2021-01-11 12:35:00	26.5	61.3	18.4
2021-01-11 12:37:00	26.5	61.3	18.4
2021-01-11 12:39:00	26.5	60.8	18.3
2021-01-11 12:41:00	26.6	61.5	18.6
2021-01-11 12:43:00	26.6	60.8	18.4
2021-01-11 12:45:00	26.7	60.7	18.5
2021-01-11 12:47:00	26.7	60.9	18.5
2021-01-11 12:49:00	26.8	60.4	18.5
2021-01-11 12:51:00	26.8	60.5	18.5
2021-01-11 12:53:00	26.8	59.5	18.2
2021-01-11 12:55:00	26.6	60.2	18.2
2021-01-11 12:57:00	26.4	61.3	18.3
2021-01-11 12:59:00	26.3	61.8	18.4
2021-01-11 13:01:00	26.1	62.5	18.4
2021-01-11 13:03:00	25.9	63	18.3
2021-01-11 13:05:00	25.8	62.9	18.2
2021-01-11 13:07:00	25.8	62.9	18.2
2021-01-11 13:09:00	25.9	62.7	18.2
2021-01-11 13:11:00	26.1	67.4	19.6
2021-01-11 13:13:00	26.4	62.5	18.7
2021-01-11 13:15:00	26.5	62.1	18.7
2021-01-11 13:17:00	26.6	61.7	18.6
2021-01-11 13:19:00	26.6	61.3	18.5
2021-01-11 13:21:00	26.7	60.9	18.5
2021-01-11 13:23:00	26.7	61.3	18.6
2021-01-11 13:25:00	26.7	60.9	18.5
2021-01-11 13:27:00	26.8	60.7	18.6
2021-01-11 13:29:00	26.8	61.2	18.7
2021-01-11 13:31:00	26.8	60.8	18.6
2021-01-11 13:33:00	26.9	60.7	18.7
2021-01-11 13:35:00	26.9	60.4	18.6
2021-01-11 13:37:00	26.9	60.2	18.5
2021-01-11 13:39:00	26.9	60.1	18.5
2021-01-11 13:41:00	27	60.1	18.6
2021-01-11 13:43:00	27	60.1	18.6
2021-01-11 13:45:00	27	60	18.6
2021-01-11 13:47:00	27	60	18.6
2021-01-11 13:49:00	27	60.1	18.6
2021-01-11 13:51:00	27	60	18.6
2021-01-11 13:53:00	26.9	60.1	18.5
2021-01-11 13:55:00	26.9	60.2	18.5
2021-01-11 13:57:00	26.9	60.2	18.5
2021-01-11 13:59:00	26.9	60.4	18.6
2021-01-11 14:01:00	26.8	60.5	18.5
2021-01-11 14:03:00	26.8	60.5	18.5
2021-01-11 14:05:00	26.7	60.7	18.5
2021-01-11 14:07:00	26.7	60.8	18.5
2021-01-11 14:09:00	26.7	60.8	18.5
2021-01-11 14:11:00	26.7	60.9	18.5
2021-01-11 14:13:00	26.6	60.9	18.4
2021-01-11 14:15:00	26.6	61.2	18.5
2021-01-11 14:17:00	26.6	61.2	18.5
2021-01-11 14:19:00	26.6	61.2	18.5
2021-01-11 14:21:00	26.6	61.3	18.5
2021-01-11 14:23:00	26.5	61.3	18.4
2021-01-11 14:25:00	26.5	61.3	18.4
2021-01-11 14:27:00	26.5	61.3	18.4
2021-01-11 14:29:00	26.4	61.4	18.4
2021-01-11 14:31:00	26.4	61.7	18.5
2021-01-11 14:33:00	26.4	61.6	18.4
2021-01-11 14:35:00	26.4	61.8	18.5
2021-01-11 14:37:00	26.4	62.1	18.6
2021-01-11 14:39:00	26.4	62.2	18.6
2021-01-11 14:41:00	26.4	62.2	18.6
2021-01-11 14:43:00	26.4	62.4	18.6
2021-01-11 14:45:00	26.3	62.5	18.6
2021-01-11 14:47:00	26.3	62.6	18.6
2021-01-11 14:49:00	26.2	62.7	18.5
2021-01-11 14:51:00	26.2	63	18.6
2021-01-11 14:53:00	26.2	63	18.6
2021-01-11 14:55:00	26.1	63.2	18.6
2021-01-11 14:57:00	26.1	63.2	18.6
2021-01-11 14:59:00	26.1	63.4	18.6
2021-01-11 15:01:00	26.1	63.4	18.6
2021-01-11 15:03:00	26.1	63.8	18.7
2021-01-11 15:05:00	26	63.9	18.6
2021-01-11 15:07:00	26	63.9	18.6
2021-01-11 15:09:00	26	64.1	18.7
2021-01-11 15:11:00	26	64.2	18.7
2021-01-11 15:13:00	26	64.2	18.7
2021-01-11 15:15:00	26	64.3	18.7
2021-01-11 15:17:00	26	64.4	18.8
2021-01-11 15:19:00	26	64.3	18.7
2021-01-11 15:21:00	26.1	64.2	18.8
2021-01-11 15:23:00	26.1	64.2	18.8
2021-01-11 15:25:00	26.1	64.3	18.8
2021-01-11 15:27:00	26.1	64.3	18.8
2021-01-11 15:29:00	26.1	64.4	18.9
2021-01-11 15:31:00	26.1	64.4	18.9
2021-01-11 15:33:00	26.1	64.6	18.9
2021-01-11 15:35:00	26.1	64.6	18.9
2021-01-11 15:37:00	26.1	64.6	18.9
2021-01-11 15:39:00	26.1	64.9	19
2021-01-11 15:41:00	26.1	64.7	18.9
2021-01-11 15:43:00	26.1	64.7	18.9
2021-01-11 15:45:00	26	64.9	18.9
2021-01-11 15:47:00	26	65.1	18.9
2021-01-11 15:49:00	26	65.4	19
2021-01-11 15:51:00	26	65.4	19
2021-01-11 15:53:00	26	65.4	19
2021-01-11 15:55:00	25.9	65.5	18.9
2021-01-11 15:57:00	26	65.6	19.1
2021-01-11 15:59:00	26	65.5	19
2021-01-11 16:01:00	26	65.5	19
2021-01-11 16:03:00	26.1	65.5	19.1
2021-01-11 16:05:00	26.2	65.4	19.2
2021-01-11 16:07:00	26.2	65.5	19.2
2021-01-11 16:09:00	26.2	65.4	19.2
2021-01-11 16:11:00	26.2	65.5	19.2
2021-01-11 16:13:00	26.1	65.6	19.2
2021-01-11 16:15:00	26.1	65.8	19.2
2021-01-11 16:17:00	26.1	66	19.2
2021-01-11 16:19:00	26	66.1	19.2
2021-01-11 16:21:00	26	66.4	19.3
2021-01-11 16:23:00	25.9	66.5	19.2
2021-01-11 16:25:00	25.9	66.6	19.2
2021-01-11 16:27:00	26	66.6	19.3
2021-01-11 16:29:00	26	66.6	19.3
2021-01-11 16:31:00	26	66.8	19.3
2021-01-11 16:33:00	26	66.8	19.3
2021-01-11 16:35:00	26	66.6	19.3
2021-01-11 16:37:00	26	66.8	19.3
2021-01-11 16:39:00	26	66.9	19.4
2021-01-11 16:41:00	26	67	19.4
2021-01-11 16:43:00	26	66.9	19.4
2021-01-11 16:45:00	26	67	19.4
2021-01-11 16:47:00	26	67.1	19.4
2021-01-11 16:49:00	26	67	19.4
2021-01-11 16:51:00	26	67.1	19.4
2021-01-11 16:53:00	26	67.1	19.4
2021-01-11 16:55:00	25.9	67.4	19.4
2021-01-11 16:57:00	25.9	67.5	19.4
2021-01-11 16:59:00	25.9	67.4	19.4
2021-01-11 17:01:00	25.9	67.6	19.4
2021-01-11 17:03:00	25.8	67.7	19.4
2021-01-11 17:05:00	25.7	67.7	19.3
2021-01-11 17:07:00	25.7	68	19.3
2021-01-11 17:09:00	25.6	68.1	19.3
2021-01-11 17:11:00	25.6	68.2	19.3
2021-01-11 17:13:00	25.5	68.5	19.3
2021-01-11 17:15:00	25.5	68.6	19.3
2021-01-11 17:17:00	25.5	68.7	19.3
2021-01-11 17:19:00	25.4	68.8	19.2
2021-01-11 17:21:00	25.3	69.2	19.2
2021-01-11 17:23:00	25.3	69.2	19.2
2021-01-11 17:25:00	25.3	69.3	19.3
2021-01-11 17:27:00	25.2	69.3	19.2
2021-01-11 17:29:00	25.2	69.6	19.2
2021-01-11 17:31:00	25.1	69.8	19.2
2021-01-11 17:33:00	25.1	70	19.2
2021-01-11 17:35:00	25	69.9	19.1
2021-01-11 17:37:00	25	69.9	19.1
2021-01-11 17:39:00	25	70.1	19.2
2021-01-11 17:41:00	24.9	70.2	19.1
2021-01-11 17:43:00	24.9	70.3	19.1
2021-01-11 17:45:00	24.8	70.4	19
2021-01-11 17:47:00	24.8	70.7	19.1
2021-01-11 17:49:00	24.8	70.7	19.1
2021-01-11 17:51:00	24.7	70.8	19
2021-01-11 17:53:00	24.7	70.9	19.1
2021-01-11 17:55:00	24.6	71	19
2021-01-11 17:57:00	24.6	71.2	19
2021-01-11 17:59:00	24.6	71.3	19.1
2021-01-11 18:01:00	24.6	71.4	19.1
2021-01-11 18:03:00	24.5	71.4	19
2021-01-11 18:05:00	24.5	71.5	19
2021-01-11 18:07:00	24.5	71.7	19.1
2021-01-11 18:09:00	24.5	71.8	19.1
2021-01-11 18:11:00	24.4	71.8	19
2021-01-11 18:13:00	24.4	71.9	19
2021-01-11 18:15:00	24.4	71.9	19
2021-01-11 18:17:00	24.4	71.9	19
2021-01-11 18:19:00	24.3	72	18.9
2021-01-11 18:21:00	24.3	72	18.9
2021-01-11 18:23:00	24.3	72.1	18.9
2021-01-11 18:25:00	24.3	72.1	18.9
2021-01-11 18:27:00	24.3	72.2	19
2021-01-11 18:29:00	24.3	72.3	19
2021-01-11 18:31:00	24.2	72.5	18.9
2021-01-11 18:33:00	24.2	72.6	19
2021-01-11 18:35:00	24.2	72.6	19
2021-01-11 18:37:00	24.2	72.7	19
2021-01-11 18:39:00	24.2	72.8	19
2021-01-11 18:41:00	24.1	73	19
2021-01-11 18:43:00	24.1	73	19
2021-01-11 18:45:00	24.1	73.2	19
2021-01-11 18:47:00	24.1	73.2	19
2021-01-11 18:49:00	24.1	73.5	19.1
2021-01-11 18:51:00	24.1	73.5	19.1
2021-01-11 18:53:00	24	73.6	19
2021-01-11 18:55:00	24	73.6	19
2021-01-11 18:57:00	24	73.7	19
2021-01-11 18:59:00	24	73.8	19
2021-01-11 19:01:00	24	73.8	19
2021-01-11 19:03:00	24	73.9	19.1
2021-01-11 19:05:00	24	73.9	19.1
2021-01-11 19:07:00	23.9	74.1	19
2021-01-11 19:09:00	23.9	74.2	19
2021-01-11 19:11:00	23.9	74.2	19
2021-01-11 19:13:00	23.9	74.3	19
2021-01-11 19:15:00	23.9	74.4	19.1
2021-01-11 19:17:00	23.9	74.4	19.1
2021-01-11 19:19:00	23.9	74.6	19.1
2021-01-11 19:21:00	23.8	74.7	19
2021-01-11 19:23:00	23.8	74.7	19
2021-01-11 19:25:00	23.8	74.8	19.1
2021-01-11 19:27:00	23.8	74.8	19.1
2021-01-11 19:29:00	23.8	74.9	19.1
2021-01-11 19:31:00	23.8	75.1	19.1
2021-01-11 19:33:00	23.8	75.1	19.1
2021-01-11 19:35:00	23.8	75.2	19.1
2021-01-11 19:37:00	23.7	75.2	19
2021-01-11 19:39:00	23.7	75.2	19
2021-01-11 19:41:00	23.7	75.3	19.1
2021-01-11 19:43:00	23.7	75.3	19.1
2021-01-11 19:45:00	23.7	75.4	19.1
2021-01-11 19:47:00	23.7	75.4	19.1
2021-01-11 19:49:00	23.7	75.4	19.1
2021-01-11 19:51:00	23.7	75.5	19.1
2021-01-11 19:53:00	23.7	75.5	19.1
2021-01-11 19:55:00	23.7	75.5	19.1
2021-01-11 19:57:00	23.7	75.7	19.2
2021-01-11 19:59:00	23.7	75.7	19.2
2021-01-11 20:01:00	23.7	75.7	19.2
2021-01-11 20:03:00	23.7	75.5	19.1
2021-01-11 20:05:00	23.7	75.6	19.1
2021-01-11 20:07:00	23.7	75.6	19.1
2021-01-11 20:09:00	23.7	75.6	19.1
2021-01-11 20:11:00	23.6	75.7	19.1
2021-01-11 20:13:00	23.6	75.7	19.1
2021-01-11 20:15:00	23.6	75.7	19.1
2021-01-11 20:17:00	23.6	75.9	19.1
2021-01-11 20:19:00	23.6	75.9	19.1
2021-01-11 20:21:00	23.6	75.9	19.1
2021-01-11 20:23:00	23.6	75.9	19.1
2021-01-11 20:25:00	23.6	76	19.1
2021-01-11 20:27:00	23.6	76	19.1
2021-01-11 20:29:00	23.5	76	19
2021-01-11 20:31:00	23.5	76	19
2021-01-11 20:33:00	23.5	76	19
2021-01-11 20:35:00	23.5	76	19
2021-01-11 20:37:00	23.5	76	19
2021-01-11 20:39:00	23.5	76	19
2021-01-11 20:41:00	23.5	76.1	19
2021-01-11 20:43:00	23.5	76.1	19
2021-01-11 20:45:00	23.5	76.1	19
2021-01-11 20:47:00	23.5	76.1	19
2021-01-11 20:49:00	23.5	76.2	19.1
2021-01-11 20:51:00	23.5	76.2	19.1
2021-01-11 20:53:00	23.4	76.2	19
2021-01-11 20:55:00	23.4	76.2	19
2021-01-11 20:57:00	23.4	76.3	19
2021-01-11 20:59:00	23.4	76.3	19
2021-01-11 21:01:00	23.4	76.3	19
2021-01-11 21:03:00	23.4	76.3	19
2021-01-11 21:05:00	23.4	76.5	19
2021-01-11 21:07:00	23.4	76.5	19
2021-01-11 21:09:00	23.4	76.3	19
2021-01-11 21:11:00	23.4	76.3	19
2021-01-11 21:13:00	23.4	76.3	19
2021-01-11 21:15:00	23.4	76.3	19
2021-01-11 21:17:00	23.4	76.3	19
2021-01-11 21:19:00	23.4	76.3	19
2021-01-11 21:21:00	23.4	76.2	19
2021-01-11 21:23:00	23.4	76.2	19
2021-01-11 21:25:00	23.4	76.2	19
2021-01-11 21:27:00	23.4	76.2	19
2021-01-11 21:29:00	23.4	76.3	19
2021-01-11 21:31:00	23.4	76.3	19
2021-01-11 21:33:00	23.4	76.2	19
2021-01-11 21:35:00	23.3	76.2	18.9
2021-01-11 21:37:00	23.3	76.2	18.9
2021-01-11 21:39:00	23.3	76.2	18.9
2021-01-11 21:41:00	23.3	76.2	18.9
2021-01-11 21:43:00	23.3	76.2	18.9
2021-01-11 21:45:00	23.3	76.2	18.9
2021-01-11 21:47:00	23.3	76.2	18.9
2021-01-11 21:49:00	23.3	76.1	18.9
2021-01-11 21:51:00	23.3	76.1	18.9
2021-01-11 21:53:00	23.3	76.1	18.9
2021-01-11 21:55:00	23.3	76.1	18.9
2021-01-11 21:57:00	23.3	76.1	18.9
2021-01-11 21:59:00	23.3	76.1	18.9
2021-01-11 22:01:00	23.3	76	18.8
2021-01-11 22:03:00	23.3	76.1	18.9
2021-01-11 22:05:00	23.3	76.1	18.9
2021-01-11 22:07:00	23.3	76	18.8
2021-01-11 22:09:00	23.3	76	18.8
2021-01-11 22:11:00	23.3	76	18.8
2021-01-11 22:13:00	23.3	76	18.8
2021-01-11 22:15:00	23.3	76	18.8
2021-01-11 22:17:00	23.3	76	18.8
2021-01-11 22:19:00	23.3	75.9	18.8
2021-01-11 22:21:00	23.3	75.9	18.8
2021-01-11 22:23:00	23.3	75.9	18.8
2021-01-11 22:25:00	23.3	75.7	18.8
2021-01-11 22:27:00	23.3	75.9	18.8
2021-01-11 22:29:00	23.3	75.7	18.8
2021-01-11 22:31:00	23.3	75.7	18.8
2021-01-11 22:33:00	23.3	75.7	18.8
2021-01-11 22:35:00	23.3	75.6	18.7
2021-01-11 22:37:00	23.3	75.6	18.7
2021-01-11 22:39:00	23.3	75.6	18.7
2021-01-11 22:41:00	23.3	75.6	18.7
2021-01-11 22:43:00	23.3	75.5	18.7
2021-01-11 22:45:00	23.3	75.5	18.7
2021-01-11 22:47:00	23.3	75.5	18.7
2021-01-11 22:49:00	23.3	75.5	18.7
2021-01-11 22:51:00	23.3	75.4	18.7
2021-01-11 22:53:00	23.3	75.4	18.7
2021-01-11 22:55:00	23.3	75.4	18.7
2021-01-11 22:57:00	23.3	75.4	18.7
2021-01-11 22:59:00	23.3	75.4	18.7
2021-01-11 23:01:00	23.3	75.4	18.7
2021-01-11 23:03:00	23.3	75.4	18.7
2021-01-11 23:05:00	23.3	75.4	18.7
2021-01-11 23:07:00	23.3	75.4	18.7
2021-01-11 23:09:00	23.3	75.4	18.7
2021-01-11 23:11:00	23.3	75.2	18.7
2021-01-11 23:13:00	23.3	75.2	18.7
2021-01-11 23:15:00	23.3	75.2	18.7
2021-01-11 23:17:00	23.3	75.2	18.7
2021-01-11 23:19:00	23.3	75.2	18.7
2021-01-11 23:21:00	23.3	75.2	18.7
2021-01-11 23:23:00	23.3	75.2	18.7
2021-01-11 23:25:00	23.3	75.1	18.6
2021-01-11 23:27:00	23.3	75.1	18.6
2021-01-11 23:29:00	23.3	75.1	18.6
2021-01-11 23:31:00	23.3	75.1	18.6
2021-01-11 23:33:00	23.3	75	18.6
2021-01-11 23:35:00	23.2	75	18.5
2021-01-11 23:37:00	23.2	75	18.5
2021-01-11 23:39:00	23.2	75	18.5
2021-01-11 23:41:00	23.2	75	18.5
2021-01-11 23:43:00	23.2	75	18.5
2021-01-11 23:45:00	23.2	75	18.5
2021-01-11 23:47:00	23.2	75	18.5
2021-01-11 23:49:00	23.2	75	18.5
2021-01-11 23:51:00	23.2	75	18.5
2021-01-11 23:53:00	23.2	75	18.5
2021-01-11 23:55:00	23.2	75	18.5
2021-01-11 23:57:00	23.3	74.9	18.6
2021-01-11 23:59:00	23.3	74.9	18.6
2021-01-12 00:01:00	23.3	74.9	18.6
2021-01-12 00:03:00	23.3	74.9	18.6
2021-01-12 00:05:00	23.3	74.9	18.6
2021-01-12 00:07:00	23.3	74.9	18.6
2021-01-12 00:09:00	23.3	74.9	18.6
2021-01-12 00:11:00	23.3	74.8	18.6
2021-01-12 00:13:00	23.3	74.8	18.6
2021-01-12 00:15:00	23.3	74.8	18.6
2021-01-12 00:17:00	23.3	74.9	18.6
2021-01-12 00:19:00	23.3	74.9	18.6
2021-01-12 00:21:00	23.3	74.8	18.6
2021-01-12 00:23:00	23.3	74.9	18.6
2021-01-12 00:25:00	23.3	74.9	18.6
2021-01-12 00:27:00	23.3	74.9	18.6
2021-01-12 00:29:00	23.3	74.9	18.6
2021-01-12 00:31:00	23.3	74.9	18.6
2021-01-12 00:33:00	23.3	75	18.6
2021-01-12 00:35:00	23.2	75	18.5
2021-01-12 00:37:00	23.2	75	18.5
2021-01-12 00:39:00	23.2	75.1	18.5
2021-01-12 00:41:00	23.2	75	18.5
2021-01-12 00:43:00	23.2	75.1	18.5
2021-01-12 00:45:00	23.2	75.1	18.5
2021-01-12 00:47:00	23.2	75.1	18.5
2021-01-12 00:49:00	23.2	75.1	18.5
2021-01-12 00:51:00	23.2	75.1	18.5
2021-01-12 00:53:00	23.2	75.2	18.6
2021-01-12 00:55:00	23.2	75.2	18.6
2021-01-12 00:57:00	23.2	75.2	18.6
2021-01-12 00:59:00	23.2	75.2	18.6
2021-01-12 01:01:00	23.2	75.2	18.6
2021-01-12 01:03:00	23.2	75.2	18.6
2021-01-12 01:05:00	23.2	75.2	18.6
2021-01-12 01:07:00	23.2	75.2	18.6
2021-01-12 01:09:00	23.2	75.2	18.6
2021-01-12 01:11:00	23.2	75.2	18.6
2021-01-12 01:13:00	23.2	75.2	18.6
2021-01-12 01:15:00	23.2	75.4	18.6
2021-01-12 01:17:00	23.2	75.2	18.6
2021-01-12 01:19:00	23.2	75.4	18.6
2021-01-12 01:21:00	23.2	75.4	18.6
2021-01-12 01:23:00	23.2	75.4	18.6
2021-01-12 01:25:00	23.2	75.4	18.6
2021-01-12 01:27:00	23.2	75.4	18.6
2021-01-12 01:29:00	23.2	75.4	18.6
2021-01-12 01:31:00	23.2	75.4	18.6
2021-01-12 01:33:00	23.2	75.5	18.6
2021-01-12 01:35:00	23.2	75.4	18.6
2021-01-12 01:37:00	23.2	75.5	18.6
2021-01-12 01:39:00	23.2	75.5	18.6
2021-01-12 01:41:00	23.2	75.5	18.6
2021-01-12 01:43:00	23.2	75.5	18.6
2021-01-12 01:45:00	23.2	75.6	18.6
2021-01-12 01:47:00	23.2	75.5	18.6
2021-01-12 01:49:00	23.2	75.6	18.6
2021-01-12 01:51:00	23.2	75.6	18.6
2021-01-12 01:53:00	23.2	75.6	18.6
2021-01-12 01:55:00	23.2	75.6	18.6
2021-01-12 01:57:00	23.2	75.6	18.6
2021-01-12 01:59:00	23.2	75.6	18.6
2021-01-12 02:01:00	23.2	75.6	18.6
2021-01-12 02:03:00	23.2	75.6	18.6
2021-01-12 02:05:00	23.2	75.6	18.6
2021-01-12 02:07:00	23.2	75.6	18.6
2021-01-12 02:09:00	23.2	75.7	18.7
2021-01-12 02:11:00	23.2	75.7	18.7
2021-01-12 02:13:00	23.2	75.7	18.7
2021-01-12 02:15:00	23.2	75.6	18.6
2021-01-12 02:17:00	23.2	75.7	18.7
2021-01-12 02:19:00	23.2	75.6	18.6
2021-01-12 02:21:00	23.2	75.6	18.6
2021-01-12 02:23:00	23.2	75.7	18.7
2021-01-12 02:25:00	23.2	75.6	18.6
2021-01-12 02:27:00	23.2	75.6	18.6
2021-01-12 02:29:00	23.2	75.6	18.6
2021-01-12 02:31:00	23.2	75.6	18.6
2021-01-12 02:33:00	23.2	75.6	18.6
2021-01-12 02:35:00	23.2	75.6	18.6
2021-01-12 02:37:00	23.2	75.7	18.7
2021-01-12 02:39:00	23.2	75.7	18.7
2021-01-12 02:41:00	23.2	75.7	18.7
2021-01-12 02:43:00	23.2	75.7	18.7
2021-01-12 02:45:00	23.2	75.7	18.7
2021-01-12 02:47:00	23.2	75.7	18.7
2021-01-12 02:49:00	23.2	75.7	18.7
2021-01-12 02:51:00	23.2	75.7	18.7
2021-01-12 02:53:00	23.2	75.9	18.7
2021-01-12 02:55:00	23.2	75.9	18.7
2021-01-12 02:57:00	23.2	75.9	18.7
2021-01-12 02:59:00	23.2	75.9	18.7
2021-01-12 03:01:00	23.2	75.9	18.7
2021-01-12 03:03:00	23.2	75.9	18.7
2021-01-12 03:05:00	23.2	75.9	18.7
2021-01-12 03:07:00	23.2	75.9	18.7
2021-01-12 03:09:00	23.2	76	18.7
2021-01-12 03:11:00	23.2	76	18.7
2021-01-12 03:13:00	23.2	76	18.7
2021-01-12 03:15:00	23.2	76	18.7
2021-01-12 03:17:00	23.2	76	18.7
2021-01-12 03:19:00	23.2	76	18.7
2021-01-12 03:21:00	23.2	76	18.7
2021-01-12 03:23:00	23.2	76	18.7
2021-01-12 03:25:00	23.2	76	18.7
2021-01-12 03:27:00	23.2	76	18.7
2021-01-12 03:29:00	23.2	76.1	18.8
2021-01-12 03:31:00	23.2	76.1	18.8
2021-01-12 03:33:00	23.2	76.1	18.8
2021-01-12 03:35:00	23.2	76.2	18.8
2021-01-12 03:37:00	23.2	76.2	18.8
2021-01-12 03:39:00	23.2	76.2	18.8
2021-01-12 03:41:00	23.2	76.2	18.8
2021-01-12 03:43:00	23.2	76.2	18.8
2021-01-12 03:45:00	23.2	76.2	18.8
2021-01-12 03:47:00	23.2	76.2	18.8
2021-01-12 03:49:00	23.2	76.2	18.8
2021-01-12 03:51:00	23.2	76.2	18.8
2021-01-12 03:53:00	23.2	76.2	18.8
2021-01-12 03:55:00	23.2	76.2	18.8
2021-01-12 03:57:00	23.2	76.2	18.8
2021-01-12 03:59:00	23.2	76.1	18.8
2021-01-12 04:01:00	23.2	76.2	18.8
2021-01-12 04:03:00	23.2	76.2	18.8
2021-01-12 04:05:00	23.2	76.1	18.8
2021-01-12 04:07:00	23.2	76.1	18.8
2021-01-12 04:09:00	23.2	76.1	18.8
2021-01-12 04:11:00	23.2	76.1	18.8
2021-01-12 04:13:00	23.2	76.1	18.8
2021-01-12 04:15:00	23.2	76.1	18.8
2021-01-12 04:17:00	23.2	76.1	18.8
2021-01-12 04:19:00	23.2	76.1	18.8
2021-01-12 04:21:00	23.2	76.1	18.8
2021-01-12 04:23:00	23.2	76.1	18.8
2021-01-12 04:25:00	23.2	76.1	18.8
2021-01-12 04:27:00	23.2	76.1	18.8
2021-01-12 04:29:00	23.2	76.1	18.8
2021-01-12 04:31:00	23.2	76.1	18.8
2021-01-12 04:33:00	23.3	76.1	18.9
2021-01-12 04:35:00	23.2	76.1	18.8
2021-01-12 04:37:00	23.2	76	18.7
2021-01-12 04:39:00	23.3	76	18.8
2021-01-12 04:41:00	23.3	76	18.8
2021-01-12 04:43:00	23.3	76	18.8
2021-01-12 04:45:00	23.3	76	18.8
2021-01-12 04:47:00	23.3	76	18.8
2021-01-12 04:49:00	23.3	76.1	18.9
2021-01-12 04:51:00	23.3	76.1	18.9
2021-01-12 04:53:00	23.3	76.1	18.9
2021-01-12 04:55:00	23.3	76.1	18.9
2021-01-12 04:57:00	23.3	76.1	18.9
2021-01-12 04:59:00	23.3	76.1	18.9
2021-01-12 05:01:00	23.3	76.1	18.9
2021-01-12 05:03:00	23.3	76.1	18.9
2021-01-12 05:05:00	23.2	76.1	18.8
2021-01-12 05:07:00	23.2	76.1	18.8
2021-01-12 05:09:00	23.3	76.1	18.9
2021-01-12 05:11:00	23.2	76.1	18.8
2021-01-12 05:13:00	23.2	76.1	18.8
2021-01-12 05:15:00	23.3	76.1	18.9
2021-01-12 05:17:00	23.3	76.1	18.9
2021-01-12 05:19:00	23.3	76.1	18.9
2021-01-12 05:21:00	23.3	76.1	18.9
2021-01-12 05:23:00	23.3	76.2	18.9
2021-01-12 05:25:00	23.3	76.1	18.9
2021-01-12 05:27:00	23.3	76.1	18.9
2021-01-12 05:29:00	23.3	76.1	18.9
2021-01-12 05:31:00	23.2	76.1	18.8
2021-01-12 05:33:00	23.3	76.1	18.9
2021-01-12 05:35:00	23.3	76.1	18.9
2021-01-12 05:37:00	23.3	76.1	18.9
2021-01-12 05:39:00	23.3	76.1	18.9
2021-01-12 05:41:00	23.3	76.1	18.9
2021-01-12 05:43:00	23.3	76.1	18.9
2021-01-12 05:45:00	23.3	76.1	18.9
2021-01-12 05:47:00	23.3	76.1	18.9
2021-01-12 05:49:00	23.3	76.1	18.9
2021-01-12 05:51:00	23.3	76.1	18.9
2021-01-12 05:53:00	23.3	76.2	18.9
2021-01-12 05:55:00	23.3	76.1	18.9
2021-01-12 05:57:00	23.3	76.1	18.9
2021-01-12 05:59:00	23.3	76.1	18.9
2021-01-12 06:01:00	23.3	76.1	18.9
2021-01-12 06:03:00	23.3	76.1	18.9
2021-01-12 06:05:00	23.3	76.1	18.9
2021-01-12 06:07:00	23.3	76.1	18.9
2021-01-12 06:09:00	23.3	76.1	18.9
2021-01-12 06:11:00	23.3	76.1	18.9
2021-01-12 06:13:00	23.3	76.1	18.9
2021-01-12 06:15:00	23.3	76.1	18.9
2021-01-12 06:17:00	23.3	76.1	18.9
2021-01-12 06:19:00	23.3	76.1	18.9
2021-01-12 06:21:00	23.3	76.1	18.9
2021-01-12 06:23:00	23.3	76.1	18.9
2021-01-12 06:25:00	23.3	76.1	18.9
2021-01-12 06:27:00	23.3	76.1	18.9
2021-01-12 06:29:00	23.3	76.1	18.9
2021-01-12 06:31:00	23.3	76.1	18.9
2021-01-12 06:33:00	23.3	76	18.8
2021-01-12 06:35:00	23.3	76	18.8
2021-01-12 06:37:00	23.3	76	18.8
2021-01-12 06:39:00	23.4	76	18.9
2021-01-12 06:41:00	23.4	76	18.9
2021-01-12 06:43:00	23.4	75.9	18.9
2021-01-12 06:45:00	23.4	75.9	18.9
2021-01-12 06:47:00	23.4	75.9	18.9
2021-01-12 06:49:00	23.4	75.9	18.9
2021-01-12 06:51:00	23.4	75.7	18.9
2021-01-12 06:53:00	23.4	75.7	18.9
2021-01-12 06:55:00	23.5	75.7	19
2021-01-12 06:57:00	23.5	75.6	18.9
2021-01-12 06:59:00	23.5	75.5	18.9
2021-01-12 07:01:00	23.5	75.5	18.9
2021-01-12 07:03:00	23.5	75.5	18.9
2021-01-12 07:05:00	23.5	75.5	18.9
2021-01-12 07:07:00	23.5	75.5	18.9
2021-01-12 07:09:00	23.6	75.4	19
2021-01-12 07:11:00	23.6	75.4	19
2021-01-12 07:13:00	23.6	75.2	18.9
2021-01-12 07:15:00	23.6	75.2	18.9
2021-01-12 07:17:00	23.7	75.2	19
2021-01-12 07:19:00	23.7	75.2	19
2021-01-12 07:21:00	23.7	75.2	19
2021-01-12 07:23:00	23.7	75.2	19
2021-01-12 07:25:00	23.7	75.1	19
2021-01-12 07:27:00	23.7	75.1	19
2021-01-12 07:29:00	23.7	74.9	19
2021-01-12 07:31:00	23.7	74.9	19
2021-01-12 07:33:00	23.8	74.8	19.1
2021-01-12 07:35:00	23.8	74.8	19.1
2021-01-12 07:37:00	23.8	74.7	19
2021-01-12 07:39:00	23.8	74.7	19
2021-01-12 07:41:00	23.8	74.6	19
2021-01-12 07:43:00	23.9	74.6	19.1
2021-01-12 07:45:00	23.9	74.4	19.1
2021-01-12 07:47:00	23.9	74.4	19.1
2021-01-12 07:49:00	23.9	74.4	19.1
2021-01-12 07:51:00	23.9	74.4	19.1
2021-01-12 07:53:00	23.9	74.3	19
2021-01-12 07:55:00	23.9	74.3	19
2021-01-12 07:57:00	24	74.3	19.1
2021-01-12 07:59:00	24	74.2	19.1
2021-01-12 08:01:00	24	74.2	19.1
2021-01-12 08:03:00	24	74.1	19.1
2021-01-12 08:05:00	24.1	73.9	19.2
2021-01-12 08:07:00	24.1	73.9	19.2
2021-01-12 08:09:00	24.1	73.9	19.2
2021-01-12 08:11:00	24.1	73.9	19.2
2021-01-12 08:13:00	24.1	73.9	19.2
2021-01-12 08:15:00	24.1	73.9	19.2
2021-01-12 08:17:00	24.1	73.9	19.2
2021-01-12 08:19:00	24.1	74.1	19.2
2021-01-12 08:21:00	24.1	73.9	19.2
2021-01-12 08:23:00	24.1	74.1	19.2
2021-01-12 08:25:00	24.1	74.1	19.2
2021-01-12 08:27:00	24.1	74.2	19.2
2021-01-12 08:29:00	24.1	74.3	19.2
2021-01-12 08:31:00	24.1	74.4	19.3
2021-01-12 08:33:00	24.1	74.4	19.3
2021-01-12 08:35:00	24.1	74.4	19.3
2021-01-12 08:37:00	24.1	74.6	19.3
2021-01-12 08:39:00	24.1	74.6	19.3
2021-01-12 08:41:00	24.1	74.7	19.3
2021-01-12 08:43:00	24.2	74.6	19.4
2021-01-12 08:45:00	24.2	74.6	19.4
2021-01-12 08:47:00	24.2	74.4	19.4
2021-01-12 08:49:00	24.2	74.4	19.4
2021-01-12 08:51:00	24.2	74.4	19.4
2021-01-12 08:53:00	24.2	74.4	19.4
2021-01-12 08:55:00	24.3	74.4	19.5
2021-01-12 08:57:00	24.3	74.4	19.5
2021-01-12 08:59:00	24.3	74.4	19.5
2021-01-12 09:01:00	24.3	74.3	19.4
2021-01-12 09:03:00	24.3	74.3	19.4
2021-01-12 09:05:00	24.3	74.3	19.4
2021-01-12 09:07:00	24.3	74.3	19.4
2021-01-12 09:09:00	24.4	74.4	19.5
2021-01-12 09:11:00	24.4	74.4	19.5
2021-01-12 09:13:00	24.5	74.4	19.6
2021-01-12 09:15:00	24.5	74.2	19.6
2021-01-12 09:17:00	24.6	74	19.7
2021-01-12 09:19:00	24.6	73.9	19.6
2021-01-12 09:21:00	24.7	73.7	19.7
2021-01-12 09:23:00	24.8	73.6	19.8
2021-01-12 09:25:00	24.8	73.4	19.7
2021-01-12 09:27:00	24.9	73.2	19.8
2021-01-12 09:29:00	25	73	19.8
2021-01-12 09:31:00	25.1	73	19.9
2021-01-12 09:33:00	25.2	72.7	19.9
2021-01-12 09:35:00	25.2	72.5	19.9
2021-01-12 09:37:00	25.2	72.4	19.9
2021-01-12 09:39:00	25.3	72.3	20
2021-01-12 09:41:00	25.3	72.4	20
2021-01-12 09:43:00	25.3	72.4	20
2021-01-12 09:45:00	25.3	72.3	20
2021-01-12 09:47:00	25.3	72.2	19.9
2021-01-12 09:49:00	25.3	72.3	20
2021-01-12 09:51:00	25.3	72.3	20
2021-01-12 09:53:00	25.3	72.3	20
2021-01-12 09:55:00	25.3	72.3	20
2021-01-12 09:57:00	25.3	72.3	20
2021-01-12 09:59:00	25.3	72.3	20
2021-01-12 10:01:00	25.3	72.3	20
2021-01-12 10:03:00	25.3	72.3	20
2021-01-12 10:05:00	25.2	72.3	19.9
2021-01-12 10:07:00	25.2	72.3	19.9
2021-01-12 10:09:00	25.2	72.4	19.9
2021-01-12 10:11:00	25.2	72.4	19.9
2021-01-12 10:13:00	25.2	72.4	19.9
2021-01-12 10:15:00	25.2	72.4	19.9
2021-01-12 10:17:00	25.2	72.4	19.9
2021-01-12 10:19:00	25.2	72.4	19.9
2021-01-12 10:21:00	25.2	72.5	19.9
2021-01-12 10:23:00	25.3	72.4	20
2021-01-12 10:25:00	25.3	72.5	20
2021-01-12 10:27:00	25.3	72.4	20
2021-01-12 10:29:00	25.3	72.5	20
2021-01-12 10:31:00	25.3	72.4	20
2021-01-12 10:33:00	25.3	72.3	20
2021-01-12 10:35:00	25.3	72.3	20
2021-01-12 10:37:00	25.4	72.3	20
2021-01-12 10:39:00	25.4	72.2	20
2021-01-12 10:41:00	25.4	72.2	20
2021-01-12 10:43:00	25.4	72	20
2021-01-12 10:45:00	25.5	72.2	20.1
2021-01-12 10:47:00	25.5	72	20.1
2021-01-12 10:49:00	25.5	71.9	20.1
2021-01-12 10:51:00	25.5	71.9	20.1
2021-01-12 10:53:00	25.5	71.9	20.1
2021-01-12 10:55:00	25.5	71.8	20
2021-01-12 10:57:00	25.5	71.9	20.1
2021-01-12 10:59:00	25.5	71.8	20
2021-01-12 11:01:00	25.6	71.7	20.1
2021-01-12 11:03:00	25.5	71.8	20
2021-01-12 11:05:00	25.6	71.8	20.1
2021-01-12 11:07:00	25.6	71.7	20.1
2021-01-12 11:09:00	25.6	72	20.2
2021-01-12 11:11:00	25.6	71.8	20.1
2021-01-12 11:13:00	25.6	71.7	20.1
2021-01-12 11:15:00	25.5	71.8	20
2021-01-12 11:17:00	25.5	71.9	20.1
2021-01-12 11:19:00	25.6	72.3	20.2
2021-01-12 11:21:00	25.6	71.8	20.1
2021-01-12 11:23:00	25.6	71.7	20.1
2021-01-12 11:25:00	25.7	71.6	20.2
2021-01-12 11:27:00	25.7	71.6	20.2
2021-01-12 11:29:00	25.7	71.4	20.1
2021-01-12 11:31:00	25.7	71.4	20.1
2021-01-12 11:33:00	25.7	71.4	20.1
2021-01-12 11:35:00	25.7	71.3	20.1
2021-01-12 11:37:00	25.7	71.4	20.1
2021-01-12 11:39:00	25.7	71.4	20.1
2021-01-12 11:41:00	25.7	71.6	20.2
2021-01-12 11:43:00	25.7	71.6	20.2
2021-01-12 11:45:00	25.8	71.6	20.3
2021-01-12 11:47:00	25.8	71.6	20.3
2021-01-12 11:49:00	25.8	71.5	20.3
2021-01-12 11:51:00	25.8	71.6	20.3
2021-01-12 11:53:00	25.9	71.3	20.3
2021-01-12 11:55:00	25.8	71.6	20.3
2021-01-12 11:57:00	25.6	72.4	20.3
2021-01-12 11:59:00	25.4	72.8	20.2
2021-01-12 12:01:00	25.2	73.3	20.1
2021-01-12 12:03:00	25.1	74	20.1
2021-01-12 12:13:00	25.2	74.3	20.3
2021-01-12 12:15:00	25.3	73.8	20.3
2021-01-12 12:17:00	25.4	73.3	20.3
2021-01-12 12:19:00	25.5	72.9	20.3
2021-01-12 12:21:00	25.6	72.7	20.3
2021-01-12 12:23:00	25.7	72.4	20.4
2021-01-12 12:25:00	25.8	72.2	20.4
2021-01-12 12:27:00	25.9	72	20.5
2021-01-12 12:29:00	26	71.7	20.5
2021-01-12 12:31:00	26.1	71.2	20.5
2021-01-12 12:33:00	26.1	71.1	20.5
2021-01-12 12:35:00	26.2	70.8	20.5
2021-01-12 12:37:00	26.3	70.6	20.5
2021-01-12 12:39:00	26.4	70.2	20.5
2021-01-12 12:41:00	26.4	70	20.5
2021-01-12 12:43:00	26.4	69.7	20.4
2021-01-12 12:45:00	26.5	69.5	20.5
2021-01-12 12:47:00	26.5	69.6	20.5
2021-01-12 12:49:00	26.5	69.6	20.5
2021-01-12 12:51:00	26.6	69.5	20.6
2021-01-12 12:53:00	26.6	69.3	20.5
2021-01-12 12:55:00	26.6	69.1	20.5
2021-01-12 12:57:00	26.6	69.1	20.5
2021-01-12 12:59:00	26.7	69	20.5
2021-01-12 13:01:00	26.7	69	20.5
2021-01-12 13:03:00	26.7	69	20.5
2021-01-12 13:05:00	26.7	68.9	20.5
2021-01-12 13:07:00	26.7	68.9	20.5
2021-01-12 13:09:00	26.7	68.9	20.5
2021-01-12 13:11:00	26.6	68.9	20.4
2021-01-12 13:13:00	26.6	68.7	20.4
2021-01-12 13:15:00	26.6	68.9	20.4
2021-01-12 13:17:00	26.5	69	20.3
2021-01-12 13:19:00	26.5	69	20.3
2021-01-12 13:21:00	26.5	69	20.3
2021-01-12 13:23:00	26.4	69.1	20.3
2021-01-12 13:25:00	26.4	69.2	20.3
2021-01-12 13:27:00	26.4	69.4	20.3
2021-01-12 13:29:00	26.4	69.5	20.4
2021-01-12 13:31:00	26.3	69.6	20.3
2021-01-12 13:33:00	26.3	69.7	20.3
2021-01-12 13:35:00	26.2	69.7	20.2
2021-01-12 13:37:00	26.3	69.7	20.3
2021-01-12 13:39:00	26.3	69.6	20.3
2021-01-12 13:41:00	26.3	69.5	20.3
2021-01-12 13:43:00	26.3	69.5	20.3
2021-01-12 13:45:00	26.4	69.4	20.3
2021-01-12 13:47:00	26.4	69.2	20.3
2021-01-12 13:49:00	26.4	69.2	20.3
2021-01-12 13:51:00	26.4	68.9	20.2
2021-01-12 13:53:00	26.4	68.6	20.2
2021-01-12 13:55:00	26.5	68.6	20.3
2021-01-12 13:57:00	26.5	68.5	20.2
2021-01-12 13:59:00	26.5	68.4	20.2
2021-01-12 14:01:00	26.5	68.3	20.2
2021-01-12 14:03:00	26.5	68.3	20.2
2021-01-12 14:05:00	26.5	68.3	20.2
2021-01-12 14:07:00	26.5	68.2	20.2
2021-01-12 14:09:00	26.4	68.2	20.1
2021-01-12 14:11:00	26.4	68.4	20.1
2021-01-12 14:13:00	26.4	68.5	20.1
2021-01-12 14:15:00	26.4	68.5	20.1
2021-01-12 14:17:00	26.4	68.6	20.2
2021-01-12 14:19:00	26.4	68.7	20.2
2021-01-12 14:21:00	26.3	68.9	20.1
2021-01-12 14:23:00	26.3	69.1	20.2
2021-01-12 14:25:00	26.2	69.4	20.2
2021-01-12 14:27:00	26.1	69.5	20.1
2021-01-12 14:29:00	26.1	69.6	20.1
2021-01-12 14:31:00	26.1	69.7	20.1
2021-01-12 14:33:00	26.1	70	20.2
2021-01-12 14:35:00	26	70	20.1
2021-01-12 14:37:00	26	70.2	20.1
2021-01-12 14:39:00	26	70.2	20.1
2021-01-12 14:41:00	25.9	70.5	20.1
2021-01-12 14:43:00	25.9	70.5	20.1
2021-01-12 14:45:00	25.9	70.6	20.1
2021-01-12 14:47:00	25.9	70.7	20.2
2021-01-12 14:49:00	25.8	70.7	20.1
2021-01-12 14:51:00	25.8	70.8	20.1
2021-01-12 14:53:00	25.8	71	20.1
2021-01-12 14:55:00	25.8	71.1	20.2
2021-01-12 14:57:00	25.7	71.1	20.1
2021-01-12 14:59:00	25.7	71.2	20.1
2021-01-12 15:01:00	25.7	71.2	20.1
2021-01-12 15:03:00	25.7	71.4	20.1
2021-01-12 15:05:00	25.6	71.4	20
2021-01-12 15:07:00	25.7	71.6	20.2
2021-01-12 15:09:00	25.7	71.4	20.1
2021-01-12 15:11:00	25.8	71.2	20.2
2021-01-12 15:13:00	25.8	71.3	20.2
2021-01-12 15:15:00	25.8	71.2	20.2
2021-01-12 15:17:00	25.9	71.1	20.3
2021-01-12 15:19:00	25.9	71	20.2
2021-01-12 15:21:00	26	71	20.3
2021-01-12 15:23:00	26	70.7	20.3
2021-01-12 15:25:00	26	70.7	20.3
2021-01-12 15:27:00	26	70.8	20.3
2021-01-12 15:29:00	26	70.8	20.3
2021-01-12 15:31:00	25.9	70.8	20.2
2021-01-12 15:33:00	25.9	70.8	20.2
2021-01-12 15:35:00	25.9	71	20.2
2021-01-12 15:37:00	25.9	71	20.2
2021-01-12 15:39:00	25.8	71.1	20.2
2021-01-12 15:41:00	25.8	71.2	20.2
2021-01-12 15:43:00	25.8	71.2	20.2
2021-01-12 15:45:00	25.7	71.2	20.1
2021-01-12 15:47:00	25.7	71.2	20.1
2021-01-12 15:49:00	25.6	71.3	20
2021-01-12 15:51:00	25.6	71.4	20
2021-01-12 15:53:00	25.6	71.6	20.1
2021-01-12 15:55:00	25.5	71.6	20
2021-01-12 15:57:00	25.5	71.7	20
2021-01-12 15:59:00	25.5	71.7	20
2021-01-12 16:01:00	25.4	71.9	20
2021-01-12 16:03:00	25.4	71.9	20
2021-01-12 16:05:00	25.4	71.9	20
2021-01-12 16:07:00	25.4	72	20
2021-01-12 16:09:00	25.4	71.9	20
2021-01-12 16:11:00	25.4	71.9	20
2021-01-12 16:13:00	25.4	71.9	20
2021-01-12 16:15:00	25.4	71.9	20
2021-01-12 16:17:00	25.4	71.9	20
2021-01-12 16:19:00	25.4	71.9	20
2021-01-12 16:21:00	25.4	71.9	20
2021-01-12 16:23:00	25.4	71.9	20
2021-01-12 16:25:00	25.4	71.8	19.9
2021-01-12 16:27:00	25.4	72	20
2021-01-12 16:29:00	25.3	72	19.9
2021-01-12 16:31:00	25.3	71.9	19.9
2021-01-12 16:33:00	25.3	71.9	19.9
2021-01-12 16:35:00	25.3	71.9	19.9
2021-01-12 16:37:00	25.3	72	19.9
2021-01-12 16:39:00	25.3	72	19.9
2021-01-12 16:41:00	25.3	71.9	19.9
2021-01-12 16:43:00	25.3	71.9	19.9
2021-01-12 16:45:00	25.3	71.9	19.9
2021-01-12 16:47:00	25.3	71.9	19.9
2021-01-12 16:49:00	25.3	71.9	19.9
2021-01-12 16:51:00	25.3	71.9	19.9
2021-01-12 16:53:00	25.3	71.9	19.9
2021-01-12 16:55:00	25.3	71.8	19.8
2021-01-12 16:57:00	25.3	71.9	19.9
2021-01-12 16:59:00	25.3	71.8	19.8
2021-01-12 17:01:00	25.3	71.8	19.8
2021-01-12 17:03:00	25.3	71.8	19.8
2021-01-12 17:05:00	25.3	71.8	19.8
2021-01-12 17:07:00	25.3	71.9	19.9
2021-01-12 17:09:00	25.3	71.8	19.8
2021-01-12 17:11:00	25.3	71.8	19.8
2021-01-12 17:13:00	25.3	71.8	19.8
2021-01-12 17:15:00	25.3	71.8	19.8
2021-01-12 17:17:00	25.3	71.8	19.8
2021-01-12 17:19:00	25.3	71.9	19.9
2021-01-12 17:21:00	25.2	72	19.8
2021-01-12 17:23:00	25.2	72.2	19.8
2021-01-12 17:25:00	25.2	72.4	19.9
2021-01-12 17:27:00	25.1	72.5	19.8
2021-01-12 17:29:00	25.1	72.5	19.8
2021-01-12 17:31:00	25	72.6	19.7
2021-01-12 17:33:00	25	72.8	19.8
2021-01-12 17:35:00	25	72.9	19.8
2021-01-12 17:37:00	24.9	73	19.7
2021-01-12 17:39:00	24.9	73.1	19.7
2021-01-12 17:41:00	24.8	73.1	19.7
2021-01-12 17:43:00	24.8	73.2	19.7
2021-01-12 17:45:00	24.8	73.4	19.7
2021-01-12 17:47:00	24.7	73.5	19.6
2021-01-12 17:49:00	24.7	73.6	19.7
2021-01-12 17:51:00	24.6	73.7	19.6
2021-01-12 17:53:00	24.6	74	19.7
2021-01-12 17:55:00	24.5	74.1	19.6
2021-01-12 17:57:00	24.5	74.2	19.6
2021-01-12 17:59:00	24.4	74.4	19.5
2021-01-12 18:01:00	24.4	74.6	19.6
2021-01-12 18:03:00	24.4	74.6	19.6
2021-01-12 18:05:00	24.3	74.6	19.5
2021-01-12 18:07:00	24.3	74.7	19.5
2021-01-12 18:09:00	24.3	74.7	19.5
2021-01-12 18:11:00	24.3	74.8	19.5
2021-01-12 18:13:00	24.3	74.8	19.5
2021-01-12 18:15:00	24.3	74.8	19.5
2021-01-12 18:17:00	24.3	74.8	19.5
2021-01-12 18:19:00	24.3	74.8	19.5
2021-01-12 18:21:00	24.3	74.8	19.5
2021-01-12 18:23:00	24.3	74.8	19.5
2021-01-12 18:25:00	24.3	74.9	19.6
2021-01-12 18:27:00	24.2	75.1	19.5
2021-01-12 18:29:00	24.2	75.1	19.5
2021-01-12 18:31:00	24.2	75.2	19.5
2021-01-12 18:33:00	24.2	75.2	19.5
2021-01-12 18:35:00	24.2	75.3	19.5
2021-01-12 18:37:00	24.1	75.4	19.5
2021-01-12 18:39:00	24.1	75.4	19.5
2021-01-12 18:41:00	24.1	75.5	19.5
2021-01-12 18:43:00	24.1	75.7	19.5
2021-01-12 18:45:00	24	75.7	19.4
2021-01-12 18:47:00	24	75.8	19.5
2021-01-12 18:49:00	24	75.9	19.5
2021-01-12 18:51:00	24	75.9	19.5
2021-01-12 18:53:00	24	76	19.5
2021-01-12 18:55:00	23.9	76.1	19.4
2021-01-12 18:57:00	23.9	76.1	19.4
2021-01-12 18:59:00	23.9	76.3	19.5
2021-01-12 19:01:00	23.9	76.3	19.5
2021-01-12 19:03:00	23.9	76.4	19.5
2021-01-12 19:05:00	23.8	76.4	19.4
2021-01-12 19:07:00	23.8	76.5	19.4
2021-01-12 19:09:00	23.8	76.6	19.4
2021-01-12 19:11:00	23.8	76.6	19.4
2021-01-12 19:13:00	23.8	76.8	19.5
2021-01-12 19:15:00	23.8	76.8	19.5
2021-01-12 19:17:00	23.7	76.9	19.4
2021-01-12 19:19:00	23.7	76.9	19.4
2021-01-12 19:21:00	23.7	76.9	19.4
2021-01-12 19:23:00	23.7	76.9	19.4
2021-01-12 19:25:00	23.7	76.9	19.4
2021-01-12 19:27:00	23.7	77	19.4
2021-01-12 19:29:00	23.7	77.1	19.4
2021-01-12 19:31:00	23.7	77.1	19.4
2021-01-12 19:33:00	23.7	77.1	19.4
2021-01-12 19:35:00	23.7	76.9	19.4
2021-01-12 19:37:00	23.7	77.1	19.4
2021-01-12 19:39:00	23.7	77.1	19.4
2021-01-12 19:41:00	23.7	77.1	19.4
2021-01-12 19:43:00	23.6	77.2	19.4
2021-01-12 19:45:00	23.6	77.2	19.4
2021-01-12 19:47:00	23.6	77.2	19.4
2021-01-12 19:49:00	23.6	77.2	19.4
2021-01-12 19:51:00	23.6	77.2	19.4
2021-01-12 19:53:00	23.6	77.3	19.4
2021-01-12 19:55:00	23.6	77.3	19.4
2021-01-12 19:57:00	23.6	77.3	19.4
2021-01-12 19:59:00	23.6	77.4	19.4
2021-01-12 20:01:00	23.5	77.4	19.3
2021-01-12 20:03:00	23.5	77.4	19.3
2021-01-12 20:05:00	23.5	77.4	19.3
2021-01-12 20:07:00	23.5	77.6	19.4
2021-01-12 20:09:00	23.5	77.6	19.4
2021-01-12 20:11:00	23.5	77.7	19.4
2021-01-12 20:13:00	23.5	77.7	19.4
2021-01-12 20:15:00	23.5	77.7	19.4
2021-01-12 20:17:00	23.5	77.7	19.4
2021-01-12 20:19:00	23.5	77.8	19.4
2021-01-12 20:21:00	23.5	77.8	19.4
2021-01-12 20:23:00	23.5	77.8	19.4
2021-01-12 20:25:00	23.5	77.9	19.4
2021-01-12 20:27:00	23.5	77.9	19.4
2021-01-12 20:29:00	23.5	77.9	19.4
2021-01-12 20:31:00	23.5	77.9	19.4
2021-01-12 20:33:00	23.4	78	19.3
2021-01-12 20:35:00	23.4	78	19.3
2021-01-12 20:37:00	23.4	78	19.3
2021-01-12 20:39:00	23.4	78	19.3
2021-01-12 20:41:00	23.4	78	19.3
2021-01-12 20:43:00	23.4	78.2	19.4
2021-01-12 20:45:00	23.4	78.2	19.4
2021-01-12 20:47:00	23.4	78.2	19.4
2021-01-12 20:49:00	23.4	78.2	19.4
2021-01-12 20:51:00	23.4	78.2	19.4
2021-01-12 20:53:00	23.4	78.2	19.4
2021-01-12 20:55:00	23.4	78.2	19.4
2021-01-12 20:57:00	23.4	78.2	19.4
2021-01-12 20:59:00	23.4	78.2	19.4
2021-01-12 21:01:00	23.4	78.2	19.4
2021-01-12 21:03:00	23.4	78.2	19.4
2021-01-12 21:05:00	23.4	78.2	19.4
2021-01-12 21:07:00	23.4	78	19.3
2021-01-12 21:09:00	23.4	78	19.3
2021-01-12 21:11:00	23.4	78	19.3
2021-01-12 21:13:00	23.4	78	19.3
2021-01-12 21:15:00	23.3	78	19.2
2021-01-12 21:17:00	23.3	77.9	19.2
2021-01-12 21:19:00	23.3	77.9	19.2
2021-01-12 21:21:00	23.3	77.9	19.2
2021-01-12 21:23:00	23.3	77.9	19.2
2021-01-12 21:25:00	23.3	77.8	19.2
2021-01-12 21:27:00	23.3	77.8	19.2
2021-01-12 21:29:00	23.3	77.8	19.2
2021-01-12 21:31:00	23.3	77.7	19.2
2021-01-12 21:33:00	23.3	77.7	19.2
2021-01-12 21:35:00	23.3	77.7	19.2
2021-01-12 21:37:00	23.3	77.7	19.2
2021-01-12 21:39:00	23.3	77.7	19.2
2021-01-12 21:41:00	23.3	77.6	19.2
2021-01-12 21:43:00	23.3	77.6	19.2
2021-01-12 21:45:00	23.3	77.6	19.2
2021-01-12 21:47:00	23.3	77.4	19.1
2021-01-12 21:49:00	23.3	77.4	19.1
2021-01-12 21:51:00	23.3	77.4	19.1
2021-01-12 21:53:00	23.3	77.4	19.1
2021-01-12 21:55:00	23.3	77.4	19.1
2021-01-12 21:57:00	23.3	77.4	19.1
2021-01-12 21:59:00	23.3	77.4	19.1
2021-01-12 22:01:00	23.3	77.4	19.1
2021-01-12 22:03:00	23.3	77.3	19.1
2021-01-12 22:05:00	23.3	77.3	19.1
2021-01-12 22:07:00	23.3	77.3	19.1
2021-01-12 22:09:00	23.3	77.3	19.1
2021-01-12 22:11:00	23.3	77.3	19.1
2021-01-12 22:13:00	23.3	77.3	19.1
2021-01-12 22:15:00	23.3	77.3	19.1
2021-01-12 22:17:00	23.3	77.2	19.1
2021-01-12 22:19:00	23.3	77.2	19.1
2021-01-12 22:21:00	23.3	77.2	19.1
2021-01-12 22:23:00	23.3	77.2	19.1
2021-01-12 22:25:00	23.3	77.2	19.1
2021-01-12 22:27:00	23.3	77.2	19.1
2021-01-12 22:29:00	23.3	77.2	19.1
2021-01-12 22:31:00	23.3	77.2	19.1
2021-01-12 22:33:00	23.3	77.2	19.1
2021-01-12 22:35:00	23.3	77.2	19.1
2021-01-12 22:37:00	23.3	77.2	19.1
2021-01-12 22:39:00	23.3	77.2	19.1
2021-01-12 22:41:00	23.3	77.2	19.1
2021-01-12 22:43:00	23.3	77.2	19.1
2021-01-12 22:45:00	23.3	77.2	19.1
2021-01-12 22:47:00	23.3	77.2	19.1
2021-01-12 22:49:00	23.3	77.2	19.1
2021-01-12 22:51:00	23.2	77.1	19
2021-01-12 22:53:00	23.2	77.2	19
2021-01-12 22:55:00	23.2	77.1	19
2021-01-12 22:57:00	23.2	77.2	19
2021-01-12 22:59:00	23.2	77.2	19
2021-01-12 23:01:00	23.2	77.1	19
2021-01-12 23:03:00	23.2	77.1	19
2021-01-12 23:05:00	23.2	77.1	19
2021-01-12 23:07:00	23.2	77.1	19
2021-01-12 23:09:00	23.2	77.1	19
2021-01-12 23:11:00	23.2	77.1	19
2021-01-12 23:13:00	23.2	77.1	19
2021-01-12 23:15:00	23.2	77.1	19
2021-01-12 23:17:00	23.2	76.9	18.9
2021-01-12 23:19:00	23.2	76.9	18.9
2021-01-12 23:21:00	23.2	76.9	18.9
2021-01-12 23:23:00	23.2	76.9	18.9
2021-01-12 23:25:00	23.2	76.9	18.9
2021-01-12 23:27:00	23.2	76.9	18.9
2021-01-12 23:29:00	23.2	76.9	18.9
2021-01-12 23:31:00	23.2	76.9	18.9
2021-01-12 23:33:00	23.2	76.9	18.9
2021-01-12 23:35:00	23.2	76.9	18.9
2021-01-12 23:37:00	23.2	76.9	18.9
2021-01-12 23:39:00	23.2	76.9	18.9
2021-01-12 23:41:00	23.2	76.9	18.9
2021-01-12 23:43:00	23.2	76.9	18.9
2021-01-12 23:45:00	23.2	76.9	18.9
2021-01-12 23:47:00	23.2	76.9	18.9
2021-01-12 23:49:00	23.2	76.9	18.9
2021-01-12 23:51:00	23.2	76.9	18.9
2021-01-12 23:53:00	23.2	76.9	18.9
2021-01-12 23:55:00	23.2	76.9	18.9
2021-01-12 23:57:00	23.2	76.9	18.9
2021-01-12 23:59:00	23.2	76.9	18.9
2021-01-13 00:01:00	23.2	76.9	18.9
2021-01-13 00:03:00	23.2	76.9	18.9
2021-01-13 00:05:00	23.2	76.9	18.9
2021-01-13 00:07:00	23.2	76.9	18.9
2021-01-13 00:09:00	23.2	76.9	18.9
2021-01-13 00:11:00	23.2	76.9	18.9
2021-01-13 00:13:00	23.2	76.9	18.9
2021-01-13 00:15:00	23.2	76.9	18.9
2021-01-13 00:17:00	23.2	76.9	18.9
2021-01-13 00:19:00	23.2	76.9	18.9
2021-01-13 00:21:00	23.2	76.9	18.9
2021-01-13 00:23:00	23.2	76.9	18.9
2021-01-13 00:25:00	23.2	76.9	18.9
2021-01-13 00:27:00	23.2	76.9	18.9
2021-01-13 00:29:00	23.2	76.9	18.9
2021-01-13 00:31:00	23.2	76.9	18.9
2021-01-13 00:33:00	23.2	76.9	18.9
2021-01-13 00:35:00	23.2	76.9	18.9
2021-01-13 00:37:00	23.2	76.9	18.9
2021-01-13 00:39:00	23.2	76.9	18.9
2021-01-13 00:41:00	23.2	76.9	18.9
2021-01-13 00:43:00	23.2	76.9	18.9
2021-01-13 00:45:00	23.2	76.9	18.9
2021-01-13 00:47:00	23.2	76.9	18.9
2021-01-13 00:49:00	23.2	76.9	18.9
2021-01-13 00:51:00	23.2	76.9	18.9
2021-01-13 00:53:00	23.2	76.9	18.9
2021-01-13 00:55:00	23.2	76.9	18.9
2021-01-13 00:57:00	23.2	76.9	18.9
2021-01-13 00:59:00	23.2	76.9	18.9
2021-01-13 01:01:00	23.2	76.9	18.9
2021-01-13 01:03:00	23.2	76.9	18.9
2021-01-13 01:05:00	23.2	76.9	18.9
2021-01-13 01:07:00	23.2	76.9	18.9
2021-01-13 01:09:00	23.2	76.9	18.9
2021-01-13 01:11:00	23.2	76.9	18.9
2021-01-13 01:13:00	23.2	76.9	18.9
2021-01-13 01:15:00	23.2	76.9	18.9
2021-01-13 01:17:00	23.2	76.9	18.9
2021-01-13 01:19:00	23.2	76.9	18.9
2021-01-13 01:21:00	23.2	76.8	18.9
2021-01-13 01:23:00	23.2	76.9	18.9
2021-01-13 01:25:00	23.2	76.9	18.9
2021-01-13 01:27:00	23.2	76.8	18.9
2021-01-13 01:29:00	23.2	76.9	18.9
2021-01-13 01:31:00	23.2	76.8	18.9
2021-01-13 01:33:00	23.2	76.8	18.9
2021-01-13 01:35:00	23.2	76.8	18.9
2021-01-13 01:37:00	23.2	76.8	18.9
2021-01-13 01:39:00	23.2	76.7	18.9
2021-01-13 01:41:00	23.2	76.7	18.9
2021-01-13 01:43:00	23.2	76.7	18.9
2021-01-13 01:45:00	23.2	76.7	18.9
2021-01-13 01:47:00	23.2	76.7	18.9
2021-01-13 01:49:00	23.2	76.7	18.9
2021-01-13 01:51:00	23.2	76.7	18.9
2021-01-13 01:53:00	23.3	76.7	19
2021-01-13 01:55:00	23.3	76.7	19
2021-01-13 01:57:00	23.3	76.7	19
2021-01-13 01:59:00	23.2	76.7	18.9
2021-01-13 02:01:00	23.3	76.7	19
2021-01-13 02:03:00	23.2	76.7	18.9
2021-01-13 02:05:00	23.2	76.7	18.9
2021-01-13 02:07:00	23.2	76.7	18.9
2021-01-13 02:09:00	23.2	76.7	18.9
2021-01-13 02:11:00	23.2	76.7	18.9
2021-01-13 02:13:00	23.2	76.7	18.9
2021-01-13 02:15:00	23.2	76.7	18.9
2021-01-13 02:17:00	23.2	76.7	18.9
2021-01-13 02:19:00	23.2	76.7	18.9
2021-01-13 02:21:00	23.2	76.7	18.9
2021-01-13 02:23:00	23.2	76.7	18.9
2021-01-13 02:25:00	23.2	76.7	18.9
2021-01-13 02:27:00	23.2	76.7	18.9
2021-01-13 02:29:00	23.2	76.7	18.9
2021-01-13 02:31:00	23.2	76.7	18.9
2021-01-13 02:33:00	23.2	76.6	18.9
2021-01-13 02:35:00	23.2	76.6	18.9
2021-01-13 02:37:00	23.2	76.6	18.9
2021-01-13 02:39:00	23.2	76.6	18.9
2021-01-13 02:41:00	23.2	76.6	18.9
2021-01-13 02:43:00	23.3	76.6	19
2021-01-13 02:45:00	23.2	76.5	18.8
2021-01-13 02:47:00	23.2	76.5	18.8
2021-01-13 02:49:00	23.2	76.5	18.8
2021-01-13 02:51:00	23.2	76.5	18.8
2021-01-13 02:53:00	23.2	76.5	18.8
2021-01-13 02:55:00	23.2	76.5	18.8
2021-01-13 02:57:00	23.2	76.5	18.8
2021-01-13 02:59:00	23.2	76.5	18.8
2021-01-13 03:01:00	23.2	76.5	18.8
2021-01-13 03:03:00	23.2	76.5	18.8
2021-01-13 03:05:00	23.2	76.5	18.8
2021-01-13 03:07:00	23.2	76.5	18.8
2021-01-13 03:09:00	23.2	76.5	18.8
2021-01-13 03:11:00	23.2	76.5	18.8
2021-01-13 03:13:00	23.2	76.5	18.8
2021-01-13 03:15:00	23.2	76.5	18.8
2021-01-13 03:17:00	23.2	76.5	18.8
2021-01-13 03:19:00	23.2	76.5	18.8
2021-01-13 03:21:00	23.2	76.5	18.8
2021-01-13 03:23:00	23.2	76.5	18.8
2021-01-13 03:25:00	23.2	76.5	18.8
2021-01-13 03:27:00	23.2	76.5	18.8
2021-01-13 03:29:00	23.2	76.5	18.8
2021-01-13 03:31:00	23.2	76.5	18.8
2021-01-13 03:33:00	23.2	76.5	18.8
2021-01-13 03:35:00	23.2	76.5	18.8
2021-01-13 03:37:00	23.2	76.5	18.8
2021-01-13 03:39:00	23.2	76.5	18.8
2021-01-13 03:41:00	23.2	76.5	18.8
2021-01-13 03:43:00	23.2	76.5	18.8
2021-01-13 03:45:00	23.2	76.5	18.8
2021-01-13 03:47:00	23.2	76.5	18.8
2021-01-13 03:49:00	23.2	76.5	18.8
2021-01-13 03:51:00	23.2	76.5	18.8
2021-01-13 03:53:00	23.2	76.5	18.8
2021-01-13 03:55:00	23.2	76.5	18.8
2021-01-13 03:57:00	23.2	76.5	18.8
2021-01-13 03:59:00	23.2	76.3	18.8
2021-01-13 04:01:00	23.2	76.3	18.8
2021-01-13 04:03:00	23.2	76.3	18.8
2021-01-13 04:05:00	23.2	76.3	18.8
2021-01-13 04:07:00	23.2	76.3	18.8
2021-01-13 04:09:00	23.2	76.3	18.8
2021-01-13 04:11:00	23.2	76.3	18.8
2021-01-13 04:13:00	23.2	76.3	18.8
2021-01-13 04:15:00	23.2	76.3	18.8
2021-01-13 04:17:00	23.2	76.3	18.8
2021-01-13 04:19:00	23.2	76.3	18.8
2021-01-13 04:21:00	23.2	76.3	18.8
2021-01-13 04:23:00	23.2	76.3	18.8
2021-01-13 04:25:00	23.2	76.3	18.8
2021-01-13 04:27:00	23.2	76.3	18.8
2021-01-13 04:29:00	23.2	76.3	18.8
2021-01-13 04:31:00	23.2	76.3	18.8
2021-01-13 04:33:00	23.2	76.3	18.8
2021-01-13 04:35:00	23.2	76.3	18.8
2021-01-13 04:37:00	23.2	76.3	18.8
2021-01-13 04:39:00	23.2	76.3	18.8
2021-01-13 04:41:00	23.2	76.3	18.8
2021-01-13 04:43:00	23.2	76.3	18.8
2021-01-13 04:45:00	23.2	76.3	18.8
2021-01-13 04:47:00	23.2	76.3	18.8
2021-01-13 04:49:00	23.2	76.3	18.8
2021-01-13 04:51:00	23.2	76.3	18.8
2021-01-13 04:53:00	23.2	76.3	18.8
2021-01-13 04:55:00	23.2	76.3	18.8
2021-01-13 04:57:00	23.2	76.3	18.8
2021-01-13 04:59:00	23.2	76.3	18.8
2021-01-13 05:01:00	23.2	76.3	18.8
2021-01-13 05:03:00	23.2	76.3	18.8
2021-01-13 05:05:00	23.2	76.3	18.8
2021-01-13 05:07:00	23.2	76.3	18.8
2021-01-13 05:09:00	23.2	76.3	18.8
2021-01-13 05:11:00	23.2	76.3	18.8
2021-01-13 05:13:00	23.2	76.3	18.8
2021-01-13 05:15:00	23.2	76.3	18.8
2021-01-13 05:17:00	23.2	76.3	18.8
2021-01-13 05:19:00	23.2	76.3	18.8
2021-01-13 05:21:00	23.2	76.3	18.8
2021-01-13 05:23:00	23.2	76.3	18.8
2021-01-13 05:25:00	23.2	76.3	18.8
2021-01-13 05:27:00	23.2	76.3	18.8
2021-01-13 05:29:00	23.2	76.3	18.8
2021-01-13 05:31:00	23.2	76.3	18.8
2021-01-13 05:33:00	23.2	76.3	18.8
2021-01-13 05:35:00	23.2	76.3	18.8
2021-01-13 05:37:00	23.2	76.3	18.8
2021-01-13 05:39:00	23.2	76.3	18.8
2021-01-13 05:41:00	23.2	76.3	18.8
2021-01-13 05:43:00	23.2	76.3	18.8
2021-01-13 05:45:00	23.2	76.2	18.8
2021-01-13 05:47:00	23.2	76.2	18.8
2021-01-13 05:49:00	23.2	76.2	18.8
2021-01-13 05:51:00	23.2	76.2	18.8
2021-01-13 05:53:00	23.2	76.2	18.8
2021-01-13 05:55:00	23.2	76.1	18.8
2021-01-13 05:57:00	23.2	76.1	18.8
2021-01-13 05:59:00	23.2	76.1	18.8
2021-01-13 06:01:00	23.2	76.1	18.8
2021-01-13 06:03:00	23.2	76.1	18.8
2021-01-13 06:05:00	23.2	76.1	18.8
2021-01-13 06:07:00	23.2	76.1	18.8
2021-01-13 06:09:00	23.2	76	18.7
2021-01-13 06:11:00	23.2	76	18.7
2021-01-13 06:13:00	23.2	76	18.7
2021-01-13 06:15:00	23.2	76	18.7
2021-01-13 06:17:00	23.2	76	18.7
2021-01-13 06:19:00	23.2	76.1	18.8
2021-01-13 06:21:00	23.2	76.1	18.8
2021-01-13 06:23:00	23.2	76.1	18.8
2021-01-13 06:25:00	23.2	76.1	18.8
2021-01-13 06:27:00	23.2	76.1	18.8
2021-01-13 06:29:00	23.3	76	18.8
2021-01-13 06:31:00	23.3	76	18.8
2021-01-13 06:33:00	23.3	76	18.8
2021-01-13 06:35:00	23.3	76	18.8
2021-01-13 06:37:00	23.3	76	18.8
2021-01-13 06:39:00	23.3	76	18.8
2021-01-13 06:41:00	23.3	76	18.8
2021-01-13 06:43:00	23.3	76	18.8
2021-01-13 06:45:00	23.3	76	18.8
2021-01-13 06:47:00	23.3	76	18.8
2021-01-13 06:49:00	23.3	75.9	18.8
2021-01-13 06:51:00	23.3	75.9	18.8
2021-01-13 06:53:00	23.3	75.9	18.8
2021-01-13 06:55:00	23.4	75.7	18.9
2021-01-13 06:57:00	23.4	75.7	18.9
2021-01-13 06:59:00	23.4	75.7	18.9
2021-01-13 07:01:00	23.4	75.7	18.9
2021-01-13 07:03:00	23.4	75.7	18.9
2021-01-13 07:05:00	23.4	75.7	18.9
2021-01-13 07:07:00	23.4	75.7	18.9
2021-01-13 07:09:00	23.4	75.7	18.9
2021-01-13 07:11:00	23.4	75.6	18.8
2021-01-13 07:13:00	23.5	75.6	18.9
2021-01-13 07:15:00	23.5	75.7	19
2021-01-13 07:17:00	23.5	75.6	18.9
2021-01-13 07:19:00	23.5	75.6	18.9
2021-01-13 07:21:00	23.5	75.6	18.9
2021-01-13 07:23:00	23.5	75.6	18.9
2021-01-13 07:25:00	23.5	75.6	18.9
2021-01-13 07:27:00	23.5	75.6	18.9
2021-01-13 07:29:00	23.5	75.5	18.9
2021-01-13 07:31:00	23.5	75.5	18.9
2021-01-13 07:33:00	23.5	75.5	18.9
2021-01-13 07:35:00	23.6	75.5	19
2021-01-13 07:37:00	23.6	75.4	19
2021-01-13 07:39:00	23.6	75.4	19
2021-01-13 07:41:00	23.6	75.4	19
2021-01-13 07:43:00	23.7	75.2	19
2021-01-13 07:45:00	23.7	75.2	19
2021-01-13 07:47:00	23.7	75.4	19.1
2021-01-13 07:49:00	23.7	75.3	19.1
2021-01-13 07:51:00	23.7	75.2	19
2021-01-13 07:53:00	23.7	75.2	19
2021-01-13 07:55:00	23.7	75.2	19
2021-01-13 07:57:00	23.7	75.1	19
2021-01-13 07:59:00	23.7	74.9	19
2021-01-13 08:01:00	23.8	74.9	19.1
2021-01-13 08:03:00	23.8	74.9	19.1
2021-01-13 08:05:00	23.8	74.8	19.1
2021-01-13 08:07:00	23.8	74.8	19.1
2021-01-13 08:09:00	23.8	74.8	19.1
2021-01-13 08:11:00	23.8	74.8	19.1
2021-01-13 08:13:00	23.8	74.7	19
2021-01-13 08:15:00	23.9	74.7	19.1
2021-01-13 08:17:00	23.9	74.4	19.1
2021-01-13 08:19:00	23.9	74.4	19.1
2021-01-13 08:21:00	24	74.4	19.2
2021-01-13 08:23:00	24	74.3	19.1
2021-01-13 08:25:00	24	74.3	19.1
2021-01-13 08:27:00	24	74.3	19.1
2021-01-13 08:29:00	24	74.3	19.1
2021-01-13 08:31:00	24	74.2	19.1
2021-01-13 08:33:00	24.1	74.2	19.2
2021-01-13 08:35:00	24.1	74.1	19.2
2021-01-13 08:37:00	24.1	74.1	19.2
2021-01-13 08:39:00	24.2	73.9	19.2
2021-01-13 08:41:00	24.2	73.9	19.2
2021-01-13 08:43:00	24.2	73.8	19.2
2021-01-13 08:45:00	24.2	73.7	19.2
2021-01-13 08:47:00	24.3	73.7	19.3
2021-01-13 08:49:00	24.3	73.6	19.3
2021-01-13 08:51:00	24.3	73.5	19.3
2021-01-13 08:53:00	24.4	73.5	19.4
2021-01-13 08:55:00	24.4	73.3	19.3
2021-01-13 08:57:00	24.4	73.4	19.3
2021-01-13 08:59:00	24.4	73.4	19.3
2021-01-13 09:01:00	24.4	73.4	19.3
2021-01-13 09:03:00	24.4	73.2	19.3
2021-01-13 09:05:00	24.5	73.1	19.4
2021-01-13 09:07:00	24.5	73.1	19.4
2021-01-13 09:09:00	24.5	73.1	19.4
2021-01-13 09:11:00	24.5	73.1	19.4
2021-01-13 09:13:00	24.5	73	19.3
2021-01-13 09:15:00	24.6	73	19.4
2021-01-13 09:17:00	24.6	72.8	19.4
2021-01-13 09:19:00	24.6	72.6	19.3
2021-01-13 09:21:00	24.6	72.6	19.3
2021-01-13 09:23:00	24.6	72.5	19.3
2021-01-13 09:25:00	24.6	72.5	19.3
2021-01-13 09:27:00	24.7	72.4	19.4
2021-01-13 09:29:00	24.7	72.3	19.4
2021-01-13 09:31:00	24.7	72.3	19.4
2021-01-13 09:33:00	24.8	72	19.4
2021-01-13 09:35:00	24.8	71.9	19.4
2021-01-13 09:37:00	24.8	71.9	19.4
2021-01-13 09:39:00	24.8	71.8	19.4
2021-01-13 09:41:00	24.8	71.8	19.4
2021-01-13 09:43:00	24.8	71.7	19.3
2021-01-13 09:45:00	24.9	71.7	19.4
2021-01-13 09:47:00	24.9	71.7	19.4
2021-01-13 09:49:00	24.9	71.5	19.4
2021-01-13 09:51:00	24.9	71.4	19.4
2021-01-13 09:53:00	25	71.3	19.4
2021-01-13 09:55:00	25	71.3	19.4
2021-01-13 09:57:00	25.1	71.2	19.5
2021-01-13 09:59:00	25.1	71.4	19.6
2021-01-13 10:01:00	25.2	71.2	19.6
2021-01-13 10:03:00	25.2	71.1	19.6
2021-01-13 10:05:00	25.3	70.8	19.6
2021-01-13 10:07:00	25.3	70.7	19.6
2021-01-13 10:09:00	25.4	70.6	19.7
2021-01-13 10:11:00	25.4	70.7	19.7
2021-01-13 10:13:00	25.3	70.6	19.6
2021-01-13 10:15:00	25.3	70.6	19.6
2021-01-13 10:17:00	25.3	70.7	19.6
2021-01-13 10:19:00	25.3	70.8	19.6
2021-01-13 10:21:00	25.3	70.7	19.6
2021-01-13 10:23:00	25.3	70.9	19.6
2021-01-13 10:25:00	25.2	70.8	19.5
2021-01-13 10:27:00	25.2	71.1	19.6
2021-01-13 10:29:00	25.2	71.2	19.6
2021-01-13 10:31:00	25.2	71.2	19.6
2021-01-13 10:33:00	25.2	71.2	19.6
2021-01-13 10:35:00	25.2	71.4	19.7
2021-01-13 10:37:00	25.2	71.3	19.6
2021-01-13 10:39:00	25.1	71.6	19.6
2021-01-13 10:41:00	25.1	71.6	19.6
2021-01-13 10:43:00	25.1	71.6	19.6
2021-01-13 10:45:00	25.1	71.6	19.6
2021-01-13 10:47:00	25	71.5	19.5
2021-01-13 10:49:00	25	71.5	19.5
2021-01-13 10:51:00	25	71.8	19.6
2021-01-13 10:53:00	25	71.8	19.6
2021-01-13 10:55:00	25	71.9	19.6
2021-01-13 10:57:00	24.9	71.9	19.5
2021-01-13 10:59:00	24.9	72	19.5
2021-01-13 11:01:00	24.9	72	19.5
2021-01-13 11:03:00	24.9	72.1	19.5
2021-01-13 11:05:00	24.9	72	19.5
2021-01-13 11:07:00	24.9	72.1	19.5
2021-01-13 11:09:00	24.9	72	19.5
2021-01-13 11:11:00	24.9	72	19.5
2021-01-13 11:13:00	24.9	72	19.5
2021-01-13 11:15:00	24.9	72	19.5
2021-01-13 11:17:00	25	72	19.6
2021-01-13 11:19:00	25	71.9	19.6
2021-01-13 11:21:00	25	71.9	19.6
2021-01-13 11:23:00	25	71.9	19.6
2021-01-13 11:25:00	25	72	19.6
2021-01-13 11:27:00	25	72.1	19.6
2021-01-13 11:29:00	25	71.9	19.6
2021-01-13 11:31:00	25	72	19.6
2021-01-13 11:33:00	25	72.1	19.6
2021-01-13 11:35:00	25	72.1	19.6
2021-01-13 11:37:00	25	72	19.6
2021-01-13 11:39:00	25	72.1	19.6
2021-01-13 11:41:00	25	72	19.6
2021-01-13 11:43:00	25	71.9	19.6
2021-01-13 11:45:00	25	71.9	19.6
2021-01-13 11:47:00	25	72	19.6
2021-01-13 11:50:00	24.8	72.3	19.5
2021-01-13 11:52:00	24.8	72.8	19.6
2021-01-13 11:54:00	24.6	73	19.4
2021-01-13 11:56:00	24.6	73.4	19.5
2021-01-13 11:58:00	24.5	73.6	19.5
2021-01-13 12:00:00	24.5	73.9	19.5
2021-01-13 12:02:00	24.4	74.1	19.5
2021-01-13 12:04:00	24.5	73.9	19.5
2021-01-13 12:06:00	24.5	73.7	19.5
2021-01-13 12:08:00	24.6	73.4	19.5
2021-01-13 12:10:00	24.6	73.2	19.5
2021-01-13 12:12:00	24.7	73.1	19.6
2021-01-13 12:14:00	24.8	73	19.6
2021-01-13 12:16:00	24.8	72.9	19.6
2021-01-13 12:18:00	24.8	72.6	19.5
2021-01-13 12:20:00	24.9	72.5	19.6
2021-01-13 12:22:00	24.9	72.5	19.6
2021-01-13 12:24:00	25	72.5	19.7
2021-01-13 12:26:00	25	72.1	19.6
2021-01-13 12:28:00	25	72.1	19.6
2021-01-13 12:30:00	25	72.1	19.6
2021-01-13 12:32:00	25.1	71.9	19.7
2021-01-13 12:34:00	25.1	72.3	19.8
2021-01-13 12:36:00	25.1	72	19.7
2021-01-13 12:38:00	25.1	71.9	19.7
2021-01-13 12:40:00	25.1	71.8	19.6
2021-01-13 12:42:00	25.1	71.8	19.6
2021-01-13 12:44:00	25.2	71.8	19.7
2021-01-13 12:46:00	25.1	71.8	19.6
2021-01-13 12:48:00	25.1	71.8	19.6
2021-01-13 12:50:00	25.2	71.7	19.7
2021-01-13 12:52:00	25.2	71.8	19.7
2021-01-13 12:54:00	25.2	71.8	19.7
2021-01-13 12:56:00	25.2	71.7	19.7
2021-01-13 12:58:00	25.2	71.7	19.7
2021-01-13 13:00:00	25.2	71.7	19.7
2021-01-13 13:02:00	25.2	71.7	19.7
2021-01-13 13:04:00	25.2	71.7	19.7
2021-01-13 13:06:00	25.2	71.6	19.7
2021-01-13 13:08:00	25.2	71.6	19.7
2021-01-13 13:10:00	25.2	71.7	19.7
2021-01-13 13:12:00	25.2	71.6	19.7
2021-01-13 13:14:00	25.2	71.7	19.7
2021-01-13 13:16:00	25.2	71.9	19.8
2021-01-13 13:18:00	25.2	71.7	19.7
2021-01-13 13:20:00	25.2	71.7	19.7
2021-01-13 13:22:00	25.1	71.7	19.6
2021-01-13 13:24:00	25.1	71.7	19.6
2021-01-13 13:26:00	25.2	71.7	19.7
2021-01-13 13:28:00	25.1	71.8	19.6
2021-01-13 13:30:00	25.2	71.7	19.7
2021-01-13 13:32:00	25.2	71.7	19.7
2021-01-13 13:34:00	25.2	71.7	19.7
2021-01-13 13:36:00	25.2	71.6	19.7
2021-01-13 13:38:00	25.2	71.6	19.7
2021-01-13 13:40:00	25.2	71.6	19.7
2021-01-13 13:42:00	25.2	71.4	19.7
2021-01-13 13:44:00	25.2	71.4	19.7
2021-01-13 13:46:00	25.3	71.3	19.7
2021-01-13 13:48:00	25.3	71.3	19.7
2021-01-13 13:50:00	25.3	71.3	19.7
2021-01-13 13:52:00	25.3	71.2	19.7
2021-01-13 13:54:00	25.3	71.1	19.7
2021-01-13 13:56:00	25.4	71.2	19.8
2021-01-13 13:58:00	25.4	71.1	19.8
2021-01-13 14:00:00	25.4	70.9	19.7
2021-01-13 14:02:00	25.4	71.1	19.8
2021-01-13 14:04:00	25.4	70.9	19.7
2021-01-13 14:06:00	25.4	70.9	19.7
2021-01-13 14:08:00	25.4	70.9	19.7
2021-01-13 14:10:00	25.4	70.8	19.7
2021-01-13 14:12:00	25.5	70.8	19.8
2021-01-13 14:14:00	25.5	70.8	19.8
2021-01-13 14:16:00	25.5	70.7	19.8
2021-01-13 14:18:00	25.5	70.6	19.8
2021-01-13 14:20:00	25.5	70.6	19.8
2021-01-13 14:22:00	25.5	70.6	19.8
2021-01-13 14:24:00	25.5	70.6	19.8
2021-01-13 14:26:00	25.5	70.6	19.8
2021-01-13 14:28:00	25.5	70.6	19.8
2021-01-13 14:30:00	25.5	70.6	19.8
2021-01-13 14:32:00	25.5	70.6	19.8
2021-01-13 14:34:00	25.5	70.6	19.8
2021-01-13 14:36:00	25.5	70.6	19.8
2021-01-13 14:38:00	25.5	70.4	19.7
2021-01-13 14:40:00	25.6	70.4	19.8
2021-01-13 14:42:00	25.6	70.3	19.8
2021-01-13 14:44:00	25.6	70.3	19.8
2021-01-13 14:46:00	25.6	70.2	19.8
2021-01-13 14:48:00	25.6	70.2	19.8
2021-01-13 14:50:00	25.6	70.1	19.7
2021-01-13 14:52:00	25.7	70.1	19.8
2021-01-13 14:54:00	25.7	70	19.8
2021-01-13 14:56:00	25.7	70	19.8
2021-01-13 14:58:00	25.7	69.8	19.8
2021-01-13 15:00:00	25.7	69.8	19.8
2021-01-13 15:02:00	25.8	70	19.9
2021-01-13 15:04:00	25.8	69.9	19.9
2021-01-13 15:06:00	25.8	69.9	19.9
2021-01-13 15:08:00	25.8	70	19.9
2021-01-13 15:10:00	25.8	70	19.9
2021-01-13 15:12:00	25.9	69.7	19.9
2021-01-13 15:14:00	25.9	69.6	19.9
2021-01-13 15:16:00	25.9	69.6	19.9
2021-01-13 15:18:00	25.9	69.5	19.9
2021-01-13 15:20:00	25.9	69.6	19.9
2021-01-13 15:22:00	25.9	69.5	19.9
2021-01-13 15:24:00	25.9	69.5	19.9
2021-01-13 15:26:00	25.9	69.5	19.9
2021-01-13 15:28:00	25.9	69.4	19.9
2021-01-13 15:30:00	25.9	69.4	19.9
2021-01-13 15:32:00	25.9	69.4	19.9
2021-01-13 15:34:00	25.9	69.5	19.9
2021-01-13 15:36:00	25.9	69.5	19.9
2021-01-13 15:38:00	25.9	69.5	19.9
2021-01-13 15:40:00	25.8	69.6	19.8
2021-01-13 15:42:00	25.8	69.6	19.8
2021-01-13 15:44:00	25.8	69.7	19.8
2021-01-13 15:46:00	25.7	69.6	19.7
2021-01-13 15:48:00	25.7	69.7	19.7
2021-01-13 15:50:00	25.7	69.8	19.8
2021-01-13 15:52:00	25.6	70	19.7
2021-01-13 15:54:00	25.6	70.1	19.7
2021-01-13 15:56:00	25.6	70.1	19.7
2021-01-13 15:58:00	25.5	70.2	19.7
2021-01-13 16:00:00	25.5	70.3	19.7
2021-01-13 16:02:00	25.5	70.3	19.7
2021-01-13 16:04:00	25.4	70.4	19.6
2021-01-13 16:06:00	25.4	70.6	19.7
2021-01-13 16:08:00	25.4	70.8	19.7
2021-01-13 16:10:00	25.3	70.8	19.6
2021-01-13 16:12:00	25.3	71.1	19.7
2021-01-13 16:14:00	25.2	71.2	19.6
2021-01-13 16:16:00	25.2	71.2	19.6
2021-01-13 16:18:00	25.2	71.6	19.7
2021-01-13 16:20:00	25.1	71.6	19.6
2021-01-13 16:22:00	25.1	71.7	19.6
2021-01-13 16:24:00	25	71.7	19.5
2021-01-13 16:26:00	25	71.8	19.6
2021-01-13 16:28:00	25	71.8	19.6
2021-01-13 16:30:00	25	72	19.6
2021-01-13 16:32:00	24.9	71.9	19.5
2021-01-13 16:34:00	24.9	72	19.5
2021-01-13 16:36:00	24.9	72	19.5
2021-01-13 16:38:00	24.9	72.1	19.5
2021-01-13 16:40:00	24.9	72.1	19.5
2021-01-13 16:42:00	24.9	72.1	19.5
2021-01-13 16:44:00	24.8	72.1	19.4
2021-01-13 16:46:00	24.8	72.3	19.5
2021-01-13 16:48:00	24.8	72.3	19.5
2021-01-13 16:50:00	24.8	72.4	19.5
2021-01-13 16:52:00	24.8	72.4	19.5
2021-01-13 16:54:00	24.8	72.4	19.5
2021-01-13 16:56:00	24.8	72.4	19.5
2021-01-13 16:58:00	24.8	72.5	19.5
2021-01-13 17:00:00	24.8	72.5	19.5
2021-01-13 17:02:00	24.8	72.5	19.5
2021-01-13 17:04:00	24.7	72.5	19.4
2021-01-13 17:06:00	24.7	72.6	19.4
2021-01-13 17:08:00	24.7	72.6	19.4
2021-01-13 17:10:00	24.7	72.8	19.5
2021-01-13 17:12:00	24.7	72.8	19.5
2021-01-13 17:14:00	24.6	72.9	19.4
2021-01-13 17:16:00	24.6	72.9	19.4
2021-01-13 17:18:00	24.6	73	19.4
2021-01-13 17:20:00	24.6	73	19.4
2021-01-13 17:22:00	24.6	73	19.4
2021-01-13 17:24:00	24.6	73.1	19.5
2021-01-13 17:26:00	24.6	73.1	19.5
2021-01-13 17:28:00	24.6	73.1	19.5
2021-01-13 17:30:00	24.6	73.1	19.5
2021-01-13 17:32:00	24.5	73.1	19.4
2021-01-13 17:34:00	24.5	73.2	19.4
2021-01-13 17:36:00	24.5	73.2	19.4
2021-01-13 17:38:00	24.5	73.4	19.4
2021-01-13 17:40:00	24.5	73.4	19.4
2021-01-13 17:42:00	24.5	73.5	19.4
2021-01-13 17:44:00	24.4	73.5	19.4
2021-01-13 17:46:00	24.4	73.6	19.4
2021-01-13 17:48:00	24.4	73.5	19.4
2021-01-13 17:50:00	24.4	73.5	19.4
2021-01-13 17:52:00	24.3	73.6	19.3
2021-01-13 17:54:00	24.3	73.7	19.3
2021-01-13 17:56:00	24.3	73.7	19.3
2021-01-13 17:58:00	24.3	73.8	19.3
2021-01-13 18:00:00	24.2	73.9	19.2
2021-01-13 18:02:00	24.2	73.9	19.2
2021-01-13 18:04:00	24.2	74.1	19.3
2021-01-13 18:06:00	24.2	74.1	19.3
2021-01-13 18:08:00	24.2	74.2	19.3
2021-01-13 18:10:00	24.1	74.2	19.2
2021-01-13 18:12:00	24.1	74.3	19.2
2021-01-13 18:14:00	24.1	74.3	19.2
2021-01-13 18:16:00	24.1	74.4	19.3
2021-01-13 18:18:00	24.1	74.4	19.3
2021-01-13 18:20:00	24	74.4	19.2
2021-01-13 18:22:00	24	74.6	19.2
2021-01-13 18:24:00	24	74.6	19.2
2021-01-13 18:26:00	24	74.7	19.2
2021-01-13 18:28:00	24	74.7	19.2
2021-01-13 18:30:00	23.9	74.8	19.2
2021-01-13 18:32:00	23.9	74.8	19.2
2021-01-13 18:34:00	23.9	74.9	19.2
2021-01-13 18:36:00	23.9	74.9	19.2
2021-01-13 18:38:00	23.9	74.9	19.2
2021-01-13 18:40:00	23.8	75.1	19.1
2021-01-13 18:42:00	23.8	75.2	19.1
2021-01-13 18:44:00	23.8	75.2	19.1
2021-01-13 18:46:00	23.8	75.2	19.1
2021-01-13 18:48:00	23.8	75.3	19.2
2021-01-13 18:50:00	23.8	75.3	19.2
2021-01-13 18:52:00	23.7	75.4	19.1
2021-01-13 18:54:00	23.7	75.4	19.1
2021-01-13 18:56:00	23.7	75.4	19.1
2021-01-13 18:58:00	23.7	75.5	19.1
2021-01-13 19:00:00	23.7	75.5	19.1
2021-01-13 19:02:00	23.7	75.5	19.1
2021-01-13 19:04:00	23.7	75.7	19.2
2021-01-13 19:06:00	23.7	75.7	19.2
2021-01-13 19:08:00	23.7	75.7	19.2
2021-01-13 19:10:00	23.7	75.8	19.2
2021-01-13 19:12:00	23.7	75.6	19.1
2021-01-13 19:14:00	23.7	75.7	19.2
2021-01-13 19:16:00	23.7	75.7	19.2
2021-01-13 19:18:00	23.6	75.7	19.1
2021-01-13 19:20:00	23.6	75.7	19.1
2021-01-13 19:22:00	23.6	75.9	19.1
2021-01-13 19:24:00	23.6	75.9	19.1
2021-01-13 19:26:00	23.6	75.9	19.1
2021-01-13 19:28:00	23.6	76	19.1
2021-01-13 19:30:00	23.6	76	19.1
2021-01-13 19:32:00	23.6	76	19.1
2021-01-13 19:34:00	23.5	76	19
2021-01-13 19:36:00	23.5	76	19
2021-01-13 19:38:00	23.5	76.1	19
2021-01-13 19:40:00	23.5	76.1	19
2021-01-13 19:42:00	23.5	76.1	19
2021-01-13 19:44:00	23.5	76.1	19
2021-01-13 19:46:00	23.5	76.2	19.1
2021-01-13 19:48:00	23.5	76.2	19.1
2021-01-13 19:50:00	23.5	76.2	19.1
2021-01-13 19:52:00	23.5	76.2	19.1
2021-01-13 19:54:00	23.5	76.2	19.1
2021-01-13 19:56:00	23.5	76.2	19.1
2021-01-13 19:58:00	23.4	76.2	19
2021-01-13 20:00:00	23.4	76.2	19
2021-01-13 20:02:00	23.4	76.2	19
2021-01-13 20:04:00	23.4	76.3	19
2021-01-13 20:06:00	23.4	76.3	19
2021-01-13 20:08:00	23.4	76.3	19
2021-01-13 20:10:00	23.4	76.3	19
2021-01-13 20:12:00	23.4	76.3	19
2021-01-13 20:14:00	23.4	76.3	19
2021-01-13 20:16:00	23.4	76.3	19
2021-01-13 20:18:00	23.4	76.3	19
2021-01-13 20:20:00	23.4	76.3	19
2021-01-13 20:22:00	23.4	76.3	19
2021-01-13 20:24:00	23.4	76.5	19
2021-01-13 20:26:00	23.4	76.5	19
2021-01-13 20:28:00	23.4	76.5	19
2021-01-13 20:30:00	23.4	76.5	19
2021-01-13 20:32:00	23.4	76.5	19
2021-01-13 20:34:00	23.4	76.5	19
2021-01-13 20:36:00	23.4	76.6	19.1
2021-01-13 20:38:00	23.4	76.6	19.1
2021-01-13 20:40:00	23.4	76.6	19.1
2021-01-13 20:42:00	23.4	76.6	19.1
2021-01-13 20:44:00	23.3	76.6	19
2021-01-13 20:46:00	23.3	76.6	19
2021-01-13 20:48:00	23.3	76.7	19
2021-01-13 20:50:00	23.3	76.7	19
2021-01-13 20:52:00	23.3	76.7	19
2021-01-13 20:54:00	23.3	76.7	19
2021-01-13 20:56:00	23.3	76.7	19
2021-01-13 20:58:00	23.3	76.7	19
2021-01-13 21:00:00	23.3	76.7	19
2021-01-13 21:02:00	23.3	76.7	19
2021-01-13 21:04:00	23.3	76.7	19
2021-01-13 21:06:00	23.3	76.8	19
2021-01-13 21:08:00	23.3	76.8	19
2021-01-13 21:10:00	23.3	76.8	19
2021-01-13 21:12:00	23.3	76.9	19
2021-01-13 21:14:00	23.3	76.9	19
2021-01-13 21:16:00	23.3	76.9	19
2021-01-13 21:18:00	23.3	77.1	19.1
2021-01-13 21:20:00	23.3	77.1	19.1
2021-01-13 21:22:00	23.3	77.1	19.1
2021-01-13 21:24:00	23.3	77.1	19.1
2021-01-13 21:26:00	23.3	77.2	19.1
2021-01-13 21:28:00	23.3	77.1	19.1
2021-01-13 21:30:00	23.3	77.2	19.1
2021-01-13 21:32:00	23.2	77.2	19
2021-01-13 21:34:00	23.2	77.2	19
2021-01-13 21:36:00	23.2	77.2	19
2021-01-13 21:38:00	23.2	77.2	19
2021-01-13 21:40:00	23.2	77.2	19
2021-01-13 21:42:00	23.2	77.2	19
2021-01-13 21:44:00	23.2	77.3	19
2021-01-13 21:46:00	23.2	77.3	19
2021-01-13 21:48:00	23.2	77.3	19
2021-01-13 21:50:00	23.2	77.4	19
2021-01-13 21:52:00	23.2	77.3	19
2021-01-13 21:54:00	23.2	77.4	19
2021-01-13 21:56:00	23.2	77.3	19
2021-01-13 21:58:00	23.2	77.4	19
2021-01-13 22:00:00	23.2	77.4	19
2021-01-13 22:02:00	23.2	77.4	19
2021-01-13 22:04:00	23.2	77.4	19
2021-01-13 22:06:00	23.2	77.3	19
2021-01-13 22:08:00	23.2	77.4	19
2021-01-13 22:10:00	23.2	77.4	19
2021-01-13 22:12:00	23.2	77.4	19
2021-01-13 22:14:00	23.2	77.4	19
2021-01-13 22:16:00	23.2	77.4	19
2021-01-13 22:18:00	23.2	77.4	19
2021-01-13 22:20:00	23.2	77.4	19
2021-01-13 22:22:00	23.2	77.6	19.1
2021-01-13 22:24:00	23.2	77.4	19
2021-01-13 22:26:00	23.2	77.6	19.1
2021-01-13 22:28:00	23.2	77.6	19.1
2021-01-13 22:30:00	23.2	77.6	19.1
2021-01-13 22:32:00	23.2	77.6	19.1
2021-01-13 22:34:00	23.2	77.6	19.1
2021-01-13 22:36:00	23.2	77.6	19.1
2021-01-13 22:38:00	23.2	77.6	19.1
2021-01-13 22:40:00	23.2	77.6	19.1
2021-01-13 22:42:00	23.2	77.6	19.1
2021-01-13 22:44:00	23.2	77.6	19.1
2021-01-13 22:46:00	23.2	77.6	19.1
2021-01-13 22:48:00	23.2	77.7	19.1
2021-01-13 22:50:00	23.2	77.7	19.1
2021-01-13 22:52:00	23.2	77.7	19.1
2021-01-13 22:54:00	23.2	77.7	19.1
2021-01-13 22:56:00	23.2	77.7	19.1
2021-01-13 22:58:00	23.2	77.7	19.1
2021-01-13 23:00:00	23.2	77.7	19.1
2021-01-13 23:02:00	23.2	77.8	19.1
2021-01-13 23:04:00	23.2	77.9	19.1
2021-01-13 23:06:00	23.2	77.9	19.1
2021-01-13 23:08:00	23.2	77.9	19.1
2021-01-13 23:10:00	23.2	77.9	19.1
2021-01-13 23:12:00	23.2	77.9	19.1
2021-01-13 23:14:00	23.2	77.9	19.1
2021-01-13 23:16:00	23.2	77.9	19.1
2021-01-13 23:18:00	23.2	77.9	19.1
2021-01-13 23:20:00	23.2	77.9	19.1
2021-01-13 23:22:00	23.2	78	19.1
2021-01-13 23:24:00	23.2	78	19.1
2021-01-13 23:26:00	23.2	78	19.1
2021-01-13 23:28:00	23.2	78	19.1
2021-01-13 23:30:00	23.2	78	19.1
2021-01-13 23:32:00	23.2	78	19.1
2021-01-13 23:34:00	23.2	78	19.1
2021-01-13 23:36:00	23.2	78	19.1
2021-01-13 23:38:00	23.2	78	19.1
2021-01-13 23:40:00	23.2	78	19.1
2021-01-13 23:42:00	23.2	78	19.1
2021-01-13 23:44:00	23.2	78	19.1
2021-01-13 23:46:00	23.2	78	19.1
2021-01-13 23:48:00	23.2	78	19.1
2021-01-13 23:50:00	23.2	78	19.1
2021-01-13 23:52:00	23.2	78	19.1
2021-01-13 23:54:00	23.2	78	19.1
2021-01-13 23:56:00	23.2	78	19.1
2021-01-13 23:58:00	23.2	78	19.1
2021-01-14	23.2	78	19.1
2021-01-14 00:02:00	23.2	78	19.1
2021-01-14 00:04:00	23.1	78	19.1
2021-01-14 00:06:00	23.1	78	19.1
2021-01-14 00:08:00	23.1	78	19.1
2021-01-14 00:10:00	23.1	78.2	19.1
2021-01-14 00:12:00	23.1	78.2	19.1
2021-01-14 00:14:00	23.1	78.2	19.1
2021-01-14 00:16:00	23.1	78.2	19.1
2021-01-14 00:18:00	23.1	78.2	19.1
2021-01-14 00:20:00	23.1	78.2	19.1
2021-01-14 00:22:00	23.1	78.2	19.1
2021-01-14 00:24:00	23.1	78.2	19.1
2021-01-14 00:26:00	23.1	78.2	19.1
2021-01-14 00:28:00	23.1	78.2	19.1
2021-01-14 00:30:00	23.1	78.3	19.1
2021-01-14 00:32:00	23.1	78.3	19.1
2021-01-14 00:34:00	23.1	78.3	19.1
2021-01-14 00:36:00	23.1	78.3	19.1
2021-01-14 00:38:00	23.1	78.3	19.1
2021-01-14 00:40:00	23.1	78.3	19.1
2021-01-14 00:42:00	23.1	78.3	19.1
2021-01-14 00:44:00	23.1	78.3	19.1
2021-01-14 00:46:00	23.1	78.3	19.1
2021-01-14 00:48:00	23.1	78.3	19.1
2021-01-14 00:50:00	23.1	78.3	19.1
2021-01-14 00:52:00	23.1	78.3	19.1
2021-01-14 00:54:00	23.1	78.3	19.1
2021-01-14 00:56:00	23	78.3	19
2021-01-14 00:58:00	23.1	78.3	19.1
2021-01-14 01:00:00	23	78.3	19
2021-01-14 01:02:00	23.1	78.3	19.1
2021-01-14 01:04:00	23.1	78.3	19.1
2021-01-14 01:06:00	23.1	78.3	19.1
2021-01-14 01:08:00	23	78.3	19
2021-01-14 01:10:00	23.1	78.3	19.1
2021-01-14 01:12:00	23.1	78.4	19.1
2021-01-14 01:14:00	23.1	78.3	19.1
2021-01-14 01:16:00	23.1	78.3	19.1
2021-01-14 01:18:00	23	78.4	19
2021-01-14 01:20:00	23	78.4	19
2021-01-14 01:22:00	23.1	78.4	19.1
2021-01-14 01:24:00	23	78.4	19
2021-01-14 01:26:00	23	78.4	19
2021-01-14 01:28:00	23	78.4	19
2021-01-14 01:30:00	23	78.3	19
2021-01-14 01:32:00	23.1	78.4	19.1
2021-01-14 01:34:00	23	78.4	19
2021-01-14 01:36:00	23	78.4	19
2021-01-14 01:38:00	23	78.4	19
2021-01-14 01:40:00	23	78.4	19
2021-01-14 01:42:00	23.1	78.4	19.1
2021-01-14 01:44:00	23.1	78.4	19.1
2021-01-14 01:46:00	23.1	78.4	19.1
2021-01-14 01:48:00	23.1	78.4	19.1
2021-01-14 01:50:00	23.1	78.4	19.1
2021-01-14 01:52:00	23.1	78.4	19.1
2021-01-14 01:54:00	23.1	78.4	19.1
2021-01-14 01:56:00	23.1	78.4	19.1
2021-01-14 01:58:00	23.1	78.4	19.1
2021-01-14 02:00:00	23.1	78.4	19.1
2021-01-14 02:02:00	23.1	78.4	19.1
2021-01-14 02:04:00	23.1	78.4	19.1
2021-01-14 02:06:00	23.1	78.4	19.1
2021-01-14 02:08:00	23.1	78.4	19.1
2021-01-14 02:10:00	23.1	78.4	19.1
2021-01-14 02:12:00	23.1	78.3	19.1
2021-01-14 02:14:00	23.1	78.4	19.1
2021-01-14 02:16:00	23.1	78.3	19.1
2021-01-14 02:18:00	23.1	78.3	19.1
2021-01-14 02:20:00	23.1	78.3	19.1
2021-01-14 02:22:00	23.1	78.3	19.1
2021-01-14 02:24:00	23.1	78.3	19.1
2021-01-14 02:26:00	23.1	78.3	19.1
2021-01-14 02:28:00	23.1	78.3	19.1
2021-01-14 02:30:00	23.1	78.3	19.1
2021-01-14 02:32:00	23.1	78.3	19.1
2021-01-14 02:34:00	23.1	78.3	19.1
2021-01-14 02:36:00	23.1	78.3	19.1
2021-01-14 02:38:00	23.1	78.4	19.1
2021-01-14 02:40:00	23.1	78.4	19.1
2021-01-14 02:42:00	23.1	78.4	19.1
2021-01-14 02:44:00	23.1	78.4	19.1
2021-01-14 02:46:00	23.1	78.4	19.1
2021-01-14 02:48:00	23.1	78.4	19.1
2021-01-14 02:50:00	23.1	78.4	19.1
2021-01-14 02:52:00	23.1	78.4	19.1
2021-01-14 02:54:00	23.1	78.4	19.1
2021-01-14 02:56:00	23	78.3	19
2021-01-14 02:58:00	23	78.4	19
2021-01-14 03:00:00	23	78.4	19
2021-01-14 03:02:00	23	78.4	19
2021-01-14 03:04:00	23	78.4	19
2021-01-14 03:06:00	23	78.4	19
2021-01-14 03:08:00	23	78.4	19
2021-01-14 03:10:00	23	78.4	19
2021-01-14 03:12:00	23	78.4	19
2021-01-14 03:14:00	23	78.4	19
2021-01-14 03:16:00	23	78.4	19
2021-01-14 03:18:00	23	78.4	19
2021-01-14 03:20:00	23	78.4	19
2021-01-14 03:22:00	23	78.4	19
2021-01-14 03:24:00	23	78.4	19
2021-01-14 03:26:00	23	78.4	19
2021-01-14 03:28:00	23	78.4	19
2021-01-14 03:30:00	23	78.4	19
2021-01-14 03:32:00	23	78.4	19
2021-01-14 03:34:00	23	78.4	19
2021-01-14 03:36:00	23	78.5	19.1
2021-01-14 03:38:00	23	78.5	19.1
2021-01-14 03:40:00	23	78.4	19
2021-01-14 03:42:00	23	78.4	19
2021-01-14 03:44:00	23	78.5	19.1
2021-01-14 03:46:00	23	78.4	19
2021-01-14 03:48:00	23	78.4	19
2021-01-14 03:50:00	23	78.4	19
2021-01-14 03:52:00	23	78.5	19.1
2021-01-14 03:54:00	23	78.5	19.1
2021-01-14 03:56:00	23	78.5	19.1
2021-01-14 03:58:00	23	78.5	19.1
2021-01-14 04:00:00	23	78.5	19.1
2021-01-14 04:02:00	23	78.5	19.1
2021-01-14 04:04:00	23	78.5	19.1
2021-01-14 04:06:00	23	78.5	19.1
2021-01-14 04:08:00	23	78.5	19.1
2021-01-14 04:10:00	23	78.5	19.1
2021-01-14 04:12:00	23	78.5	19.1
2021-01-14 04:14:00	23	78.5	19.1
2021-01-14 04:16:00	23	78.5	19.1
2021-01-14 04:18:00	23	78.5	19.1
2021-01-14 04:20:00	23	78.5	19.1
2021-01-14 04:22:00	23	78.5	19.1
2021-01-14 04:24:00	23	78.5	19.1
2021-01-14 04:26:00	23	78.5	19.1
2021-01-14 04:28:00	23	78.5	19.1
2021-01-14 04:30:00	23	78.5	19.1
2021-01-14 04:32:00	23	78.5	19.1
2021-01-14 04:34:00	23	78.5	19.1
2021-01-14 04:36:00	23	78.5	19.1
2021-01-14 04:38:00	23	78.5	19.1
2021-01-14 04:40:00	23	78.5	19.1
2021-01-14 04:42:00	23	78.5	19.1
2021-01-14 04:44:00	23	78.5	19.1
2021-01-14 04:46:00	23	78.5	19.1
2021-01-14 04:48:00	23	78.5	19.1
2021-01-14 04:50:00	23	78.5	19.1
2021-01-14 04:52:00	23	78.5	19.1
2021-01-14 04:54:00	23	78.5	19.1
2021-01-14 04:56:00	23	78.5	19.1
2021-01-14 04:58:00	23	78.5	19.1
2021-01-14 05:00:00	23	78.5	19.1
2021-01-14 05:02:00	23	78.5	19.1
2021-01-14 05:04:00	23	78.6	19.1
2021-01-14 05:06:00	23	78.5	19.1
2021-01-14 05:08:00	23	78.5	19.1
2021-01-14 05:10:00	23	78.5	19.1
2021-01-14 05:12:00	22.9	78.6	19
2021-01-14 05:14:00	22.9	78.6	19
2021-01-14 05:16:00	22.9	78.6	19
2021-01-14 05:18:00	22.9	78.6	19
2021-01-14 05:20:00	22.9	78.8	19
2021-01-14 05:22:00	22.9	78.8	19
2021-01-14 05:24:00	22.9	78.8	19
2021-01-14 05:26:00	22.9	78.8	19
2021-01-14 05:28:00	22.9	78.8	19
2021-01-14 05:30:00	22.9	78.8	19
2021-01-14 05:32:00	22.9	78.9	19
2021-01-14 05:34:00	22.9	78.9	19
2021-01-14 05:36:00	22.9	79	19.1
2021-01-14 05:38:00	22.9	79	19.1
2021-01-14 05:40:00	22.9	79	19.1
2021-01-14 05:42:00	22.9	79	19.1
2021-01-14 05:44:00	22.9	79.1	19.1
2021-01-14 05:46:00	22.9	79.1	19.1
2021-01-14 05:48:00	22.9	79.1	19.1
2021-01-14 05:50:00	22.9	79.2	19.1
2021-01-14 05:52:00	22.9	79.2	19.1
2021-01-14 05:54:00	22.9	79.2	19.1
2021-01-14 05:56:00	22.9	79.4	19.1
2021-01-14 05:58:00	22.9	79.2	19.1
2021-01-14 06:00:00	22.9	79.4	19.1
2021-01-14 06:02:00	22.8	79.4	19
2021-01-14 06:04:00	22.8	79.4	19
2021-01-14 06:06:00	22.8	79.5	19.1
2021-01-14 06:08:00	22.9	79.5	19.2
2021-01-14 06:10:00	22.8	79.5	19.1
2021-01-14 06:12:00	22.9	79.6	19.2
2021-01-14 06:14:00	22.8	79.6	19.1
2021-01-14 06:16:00	22.8	79.5	19.1
2021-01-14 06:18:00	22.8	79.6	19.1
2021-01-14 06:20:00	22.8	79.6	19.1
2021-01-14 06:22:00	22.9	79.6	19.2
2021-01-14 06:24:00	22.9	79.6	19.2
2021-01-14 06:26:00	22.9	79.6	19.2
2021-01-14 06:28:00	22.9	79.6	19.2
2021-01-14 06:30:00	22.9	79.6	19.2
2021-01-14 06:32:00	22.9	79.7	19.2
2021-01-14 06:34:00	22.9	79.7	19.2
2021-01-14 06:36:00	22.9	79.7	19.2
2021-01-14 06:38:00	22.9	79.7	19.2
2021-01-14 06:40:00	22.9	79.7	19.2
2021-01-14 06:42:00	22.9	79.9	19.2
2021-01-14 06:44:00	22.9	79.7	19.2
2021-01-14 06:46:00	22.9	79.9	19.2
2021-01-14 06:48:00	22.9	79.9	19.2
2021-01-14 06:50:00	22.9	79.7	19.2
[truncated: 23,903 more rows]

## Sheet: SoilDryDown(SDD)
	Replicate	Time	1	2	3	4	5	6	7	8	9	10
	ContainerMass	0	8.165	8.088	8.161	7.745	8.081	8.171	7.776	8.119	8.171	7.864
	Container&PlugMass	0	9.436	9.202	9.651	8.88	9.452	9.005	9.353	9.206	9.443	9.129
	Container&DrySoilMass	0	97.104	92.412	91.972	92.731	94.252	95.23	95.99	98.411	97.945	93.374		Rep	1	2	3	4	5	6	7	8	9	10
	InitialWetMass (+-12:00)	0	130.292	124.734	125.444	125.925	129.315	127.176	127.251	124.645	130.431	126.76		0	37.9	38.8	40.7	39.6	41.3	37	36.1	29.4	36.7	39.6
	1HourPostwetting	1	129.953	124.114	124.574	125.501	127.875	126.69	127.097	124.516	130.273	126.397		0.0416667	37.5	38.1	39.6	39.1	39.6	36.5	35.9	29.3	36.5	39.2
	24HrsPostWetting	24	128.701	122.779	123.648	124.192	126.177	125.182	125.195	123.522	129.099	125.023		1	36	36.5	38.5	37.5	37.6	34.7	33.7	28.1	35.2	37.6
	48HrsPostWetting	48	127.616	121.819	122.647	123.123	125.073	124.04	123.122	122.33	128.036	123.875		2	34.8	35.3	37.3	36.2	36.3	33.4	31.3	26.8	34	36.2
	72HrsPostWetting	72	126.635	120.903	121.695	122.109	124.013	122.966	121.199	121.24	127.026	122.806		3	33.7	34.2	36.1	35	35.1	32.2	29.1	25.6	32.9	34.9
	96HrsPostWetting	96	125.609	119.943	120.683	121.066	122.925	121.852	119.383	120.184	125.998	121.73		4	32.5	33.1	34.9	33.8	33.8	30.9	27	24.4	31.7	33.7
	120HrsPostWetting	120	124.312	118.751	119.456	119.779	121.572	120.508	117.095	118.82	124.721	120.351		5	31	31.7	33.4	32.3	32.2	29.3	24.4	22.9	30.3	32
	144HrsPostWetting	144	122.829	117.383	117.956	118.32	120.049	119.001	114.63	117.268	123.28	118.853		6	29.3	30	31.6	30.5	30.4	27.6	21.5	21.1	28.6	30.2
	168HrsPostWetting	168	121.246	115.94	116.534	116.757	118.407	117.373	112.028	115.613	121.712	117.202		7	27.5	28.3	29.8	28.7	28.5	25.7	18.5	19.3	26.9	28.3
	192HrsPostWetting	192	119.783	114.588	115.122	115.261	116.857	115.854	109.832	114.095	120.274	115.702		8	25.9	26.7	28.1	26.9	26.7	23.9	16	17.6	25.2	26.5
	216HrsPostWetting	216	118.333	113.235	113.773	113.824	115.362	114.377	107.73	112.633	118.894	114.196		9	24.2	25	26.5	25.2	24.9	22.2	13.6	15.9	23.7	24.7
	240HrsPostWetting	240	116.58	111.563	112.145	112.071	113.572	112.621	105.62	110.957	117.188	112.348		10	22.2	23	24.5	23.1	22.8	20.2	11.1	14.1	21.7	22.5
	264HrsPostWetting	264	115.521	110.622	111.233	111.058	112.533	111.594	104.43	109.93	116.201	111.301		11	21	21.9	23.4	21.9	21.6	19	9.7	12.9	20.6	21.3
	288HrsPostWetting	288	114.484	109.705	110.329	110.091	111.531	110.599	103.366	108.988	115.216	110.281		12	19.8	20.8	22.3	20.7	20.4	17.8	8.5	11.9	19.5	20.1
	312HrsPostWetting	312	112.974	108.327	108.974	108.646	110.018	109.099	102.153	107.57	113.788	108.69		13	18.1	19.1	20.7	19	18.6	16.1	7.1	10.3	17.9	18.2
	336HrsPostWetting	336	111.313	106.713	107.382	106.935	108.232	107.37	101.161	106.083	112.173	106.877		14	16.2	17.2	18.7	16.9	16.5	14.1	6	8.6	16.1	16
	360HrsPostWetting	360	109.825	105.363	106.043	105.475	106.714	105.952	100.49	104.877	110.812	105.43		15	14.5	15.6	17.1	15.2	14.7	12.4	5.2	7.2	14.5	14.3
	384HrsPostWetting	384	108.467	104.134	104.828	104.177	105.375	104.692	99.966	103.934	109.581	104.071		16	13	14.1	15.6	13.7	13.1	11	4.6	6.2	13.1	12.7
	408HrsPostWetting	408	106.812	102.556	103.233	102.514	103.725	103.208	99.336	103.047	108.131	102.496		17	11.1	12.2	13.7	11.7	11.2	9.3	3.9	5.2	11.5	10.8
	432HrsPostWetting	432	105.084	100.978	101.679	100.882	102.164	101.863	98.812	102.337	106.644	101.054		18	9.1	10.3	11.8	9.7	9.3	7.7	3.3	4.4	9.8	9.1
	456HrsPostWetting	456	103.523	99.412	100.13	99.282	100.842	100.742	98.327	101.72	105.238	99.74		19	7.3	8.4	9.9	7.8	7.8	6.4	2.7	3.7	8.2	7.6
	480HrsPostWetting	480	102.497	98.171	98.881	98.129	99.964	99.995	97.97	101.273	104.229	98.869		20	6.2	6.9	8.4	6.4	6.7	5.5	2.3	3.2	7.1	6.5
	504HrsPostWetting	504	101.574	97.054	97.747	97.14	99.118	99.242	97.519	100.789	103.276	98.015		21	5.1	5.6	7	5.3	5.7	4.7	1.8	2.7	6	5.5
	528HrsPostWetting	528	100.697	96.013	96.691	96.222	98.277	98.498	97.061	100.241	102.352	97.157		22	4.1	4.3	5.7	4.2	4.7	3.8	1.2	2.1	5	4.5
	552HrsPostWetting	552	100.21	95.454	96.104	95.719	97.791	98.084	96.851	99.953	101.819	96.662		23	3.5	3.7	5	3.6	4.2	3.3	1	1.7	4.4	3.9
	576HrsPostWetting	576	99.779	94.972	95.592	95.283	97.365	97.712	96.68	99.713	101.364	96.23		24	3.1	3.1	4.4	3	3.7	2.9	0.8	1.5	3.9	3.4
	591HrsPostWetting	591	99.33	94.49	95.066	94.829	96.899	97.296	96.461	99.469	100.878	95.778		24.625	2.5	2.5	3.8	2.5	3.1	2.4	0.5	1.2	3.3	2.9
	614HrsPostWetting	614	99.024	94.164	94.7	94.517	96.575	97.005	96.37	99.331	100.544	95.455		25.5833	2.2	2.1	3.3	2.1	2.7	2.1	0.4	1	2.9	2.5
	638HrsPostWetting	638	98.715	93.826	94.318	94.193	96.224	96.703	96.263	99.168	100.179	95.111		26.5833	1.8	1.7	2.8	1.7	2.3	1.7	0.3	0.8	2.5	2.1
	662HrsPostWetting	662	98.378	93.483	93.919	93.856	95.849	96.387	96.157	98.987	99.781	94.745
	710HrsPostWetting	710	97.896	93.013	93.297	93.391	95.268	95.922	96.048	98.766	99.154	94.216
	734HrsPostWetting	734	97.792	92.917	93.096	93.286	95.095	95.799	96.036	98.747	98.96	94.073
	758HrsPostWetting	758	97.71	92.847	92.923	93.205	94.943	95.697	96.028	98.744	98.797	93.909
	782HrsPostWetting	782	97.657	92.802	92.731	93.184	94.876	95.599	96.025	98.732	98.694	93.845
	806HrsPostWetting	806	97.603	92.748	92.676	93.093	94.704	95.533	96.022	98.725	98.541	93.788
	830HrsPostWetting	830	97.469	92.625	92.489	92.967	94.533	95.401	95.963	98.637	98.347	93.629
	854HrsPostWetting	854	97.294	92.461	92.282	92.81	94.325	95.225	95.864	98.503	98.127	93.434

## Sheet: TrayTreat._Arrange.
Tray	Column	Treatment		Week#	Position	Tray#
1	1	D4		W1	A	T1
1	2	D28			B	T2
1	3	D21			C	T3
1	4	D14			D	T4
1	5	D7			E	T5
1	6	D1			F	T6
1	7	C			G	T7
2	1	D1			H	T8
2	2	D4			I	T9
2	3	D28			J	T10
2	4	D7			K	T11
2	5	C			L	T12
2	6	D21		W2	A	T10
2	7	D14			B	T2
3	1	D14			C	T1
3	2	D28			D	T12
3	3	C			E	T8
3	4	D1			F	T9
3	5	D4			G	T3
3	6	D21			H	T6
3	7	D7			I	T4
4	1	D28			J	T5
4	2	D7			K	T7
4	3	C			L	T11
4	4	D1		W3	A	T10
4	5	D14			B	T1
4	6	D21			C	T9
4	7	D4			D	T8
5	1	D21			E	T6
5	2	D1			F	T11
5	3	D7			G	T4
5	4	C			H	T7
5	5	D4			I	T12
5	6	D28			J	T3
5	7	D14			K	T2
6	1	D21			L	T5
6	2	D14		W4	A	T9
6	3	D4			B	T12
6	4	D1			C	T4
6	5	D28			D	T5
6	6	C			E	T11
6	7	D7			F	T8
7	1	C			G	T6
7	2	D28			H	T3
7	3	D4			I	T1
7	4	D21			J	T2
7	5	D1			K	T10
7	6	D14			L	T7
7	7	D7		W5	A	T3
8	1	D28			B	T8
8	2	D1			C	T1
8	3	C			D	T9
8	4	D7			E	T2
8	5	D4			F	T7
8	6	D14			G	T6
8	7	D21			H	T12
9	1	D14			I	T5
9	2	D21			J	T11
9	3	D4			K	T10
9	4	D28			L	T4
9	5	C		W6	A	T7
9	6	D7			B	T5
9	7	D1			C	T11
10	1	D21			D	T3
10	2	D4			E	T1
10	3	D7			F	T12
10	4	C			G	T6
10	5	D28			H	T10
10	6	D14			I	T4
10	7	D1			J	T9
11	1	C			K	T2
11	2	D14			L	T8
11	3	D1		W7 COLLECTION	A	T10
11	4	D4			B	T1
11	5	D21			C	T8
11	6	D28			D	T9
11	7	D7			E	T12
12	1	D7			F	T7
12	2	D4			G	T11
12	3	D14			H	T2
12	4	D21			I	T6
12	5	C			J	T4
12	6	D28			K	T5
12	7	D1			L	T3
				W8	A	T8
					B	T3
					C	T6
					D	T10
					E	T1
					F	T9
					G	T7
					H	T5
					I	T4
					J	T11
					K	T12
					L	T2

## Sheet: P_Arrange.
Tray	Column	Treatment	Row	Plant		Tray	Column	Treatment	Row	Plant
1	1	D4	A	P1		7	1	C	A	P5
1	1	D4	B	P5		7	1	C	B	P7
1	1	D4	C	P2		7	1	C	C	P6
1	1	D4	D	P7		7	1	C	D	P3
1	1	D4	E	P6		7	1	C	E	P1
1	1	D4	F	P3		7	1	C	F	P4
1	1	D4	G	P4		7	1	C	G	P2
1	2	D28	A	P5		7	2	D28	A	P7
1	2	D28	B	P3		7	2	D28	B	P6
1	2	D28	C	P6		7	2	D28	C	P2
1	2	D28	D	P4		7	2	D28	D	P1
1	2	D28	E	P1		7	2	D28	E	P5
1	2	D28	F	P2		7	2	D28	F	P4
1	2	D28	G	P7		7	2	D28	G	P3
1	3	D21	A	P3		7	3	D4	A	P3
1	3	D21	B	P6		7	3	D4	B	P2
1	3	D21	C	P7		7	3	D4	C	P7
1	3	D21	D	P4		7	3	D4	D	P4
1	3	D21	E	P5		7	3	D4	E	P1
1	3	D21	F	P2		7	3	D4	F	P5
1	3	D21	G	P1		7	3	D4	G	P6
1	4	D14	A	P1		7	4	D21	A	P7
1	4	D14	B	P3		7	4	D21	B	P6
1	4	D14	C	P5		7	4	D21	C	P4
1	4	D14	D	P2		7	4	D21	D	P5
1	4	D14	E	P6		7	4	D21	E	P2
1	4	D14	F	P7		7	4	D21	F	P1
1	4	D14	G	P4		7	4	D21	G	P3
1	5	D7	A	P1		7	5	D1	A	P7
1	5	D7	B	P3		7	5	D1	B	P4
1	5	D7	C	P4		7	5	D1	C	P1
1	5	D7	D	P6		7	5	D1	D	P6
1	5	D7	E	P2		7	5	D1	E	P2
1	5	D7	F	P5		7	5	D1	F	P3
1	5	D7	G	P7		7	5	D1	G	P5
1	6	D1	A	P5		7	6	D14	A	P2
1	6	D1	B	P6		7	6	D14	B	P6
1	6	D1	C	P3		7	6	D14	C	P5
1	6	D1	D	P4		7	6	D14	D	P3
1	6	D1	E	P2		7	6	D14	E	P1
1	6	D1	F	P1		7	6	D14	F	P7
1	6	D1	G	P7		7	6	D14	G	P4
1	7	C	A	P7		7	7	D7	A	P1
1	7	C	B	P6		7	7	D7	B	P2
1	7	C	C	P5		7	7	D7	C	P6
1	7	C	D	P3		7	7	D7	D	P3
1	7	C	E	P2		7	7	D7	E	P4
1	7	C	F	P1		7	7	D7	F	P7
1	7	C	G	P4		7	7	D7	G	P5
2	1	D1	A	P2		8	1	D28	A	P6
2	1	D1	B	P5		8	1	D28	B	P4
2	1	D1	C	P7		8	1	D28	C	P7
2	1	D1	D	P3		8	1	D28	D	P3
2	1	D1	E	P6		8	1	D28	E	P1
2	1	D1	F	P4		8	1	D28	F	P2
2	1	D1	G	P1		8	1	D28	G	P5
2	2	D4	A	P5		8	2	D1	A	P7
2	2	D4	B	P3		8	2	D1	B	P4
2	2	D4	C	P7		8	2	D1	C	P2
2	2	D4	D	P2		8	2	D1	D	P6
2	2	D4	E	P4		8	2	D1	E	P3
2	2	D4	F	P6		8	2	D1	F	P1
2	2	D4	G	P1		8	2	D1	G	P5
2	3	D28	A	P3		8	3	C	A	P6
2	3	D28	B	P5		8	3	C	B	P5
2	3	D28	C	P4		8	3	C	C	P4
2	3	D28	D	P1		8	3	C	D	P2
2	3	D28	E	P6		8	3	C	E	P3
2	3	D28	F	P2		8	3	C	F	P7
2	3	D28	G	P7		8	3	C	G	P1
2	4	D7	A	P4		8	4	D7	A	P5
2	4	D7	B	P5		8	4	D7	B	P7
2	4	D7	C	P7		8	4	D7	C	P6
2	4	D7	D	P6		8	4	D7	D	P3
2	4	D7	E	P1		8	4	D7	E	P4
2	4	D7	F	P2		8	4	D7	F	P1
2	4	D7	G	P3		8	4	D7	G	P2
2	5	C	A	P5		8	5	D4	A	P1
2	5	C	B	P2		8	5	D4	B	P6
2	5	C	C	P4		8	5	D4	C	P5
2	5	C	D	P6		8	5	D4	D	P7
2	5	C	E	P7		8	5	D4	E	P3
2	5	C	F	P3		8	5	D4	F	P2
2	5	C	G	P1		8	5	D4	G	P4
2	6	D21	A	P1		8	6	D14	A	P4
2	6	D21	B	P6		8	6	D14	B	P2
2	6	D21	C	P3		8	6	D14	C	P3
2	6	D21	D	P7		8	6	D14	D	P5
2	6	D21	E	P5		8	6	D14	E	P7
2	6	D21	F	P2		8	6	D14	F	P6
2	6	D21	G	P4		8	6	D14	G	P1
2	7	D14	A	P4		8	7	D21	A	P1
2	7	D14	B	P7		8	7	D21	B	P7
2	7	D14	C	P2		8	7	D21	C	P6
2	7	D14	D	P5		8	7	D21	D	P3
2	7	D14	E	P3		8	7	D21	E	P5
2	7	D14	F	P6		8	7	D21	F	P4
2	7	D14	G	P1		8	7	D21	G	P2
3	1	D14	A	P5		9	1	D14	A	P2
3	1	D14	B	P4		9	1	D14	B	P6
3	1	D14	C	P7		9	1	D14	C	P5
3	1	D14	D	P1		9	1	D14	D	P1
3	1	D14	E	P6		9	1	D14	E	P3
3	1	D14	F	P2		9	1	D14	F	P7
3	1	D14	G	P3		9	1	D14	G	P4
3	2	D28	A	P7		9	2	D21	A	P4
3	2	D28	B	P1		9	2	D21	B	P6
3	2	D28	C	P5		9	2	D21	C	P1
3	2	D28	D	P2		9	2	D21	D	P7
3	2	D28	E	P3		9	2	D21	E	P2
3	2	D28	F	P6		9	2	D21	F	P3
3	2	D28	G	P4		9	2	D21	G	P5
3	3	C	A	P3		9	3	D4	A	P3
3	3	C	B	P7		9	3	D4	B	P5
3	3	C	C	P2		9	3	D4	C	P2
3	3	C	D	P1		9	3	D4	D	P4
3	3	C	E	P6		9	3	D4	E	P7
3	3	C	F	P5		9	3	D4	F	P6
3	3	C	G	P4		9	3	D4	G	P1
3	4	D1	A	P7		9	4	D28	A	P4
3	4	D1	B	P1		9	4	D28	B	P6
3	4	D1	C	P4		9	4	D28	C	P5
3	4	D1	D	P6		9	4	D28	D	P1
3	4	D1	E	P5		9	4	D28	E	P7
3	4	D1	F	P2		9	4	D28	F	P3
3	4	D1	G	P3		9	4	D28	G	P2
3	5	D4	A	P7		9	5	C	A	P2
3	5	D4	B	P1		9	5	C	B	P7
3	5	D4	C	P6		9	5	C	C	P1
3	5	D4	D	P2		9	5	C	D	P3
3	5	D4	E	P3		9	5	C	E	P5
3	5	D4	F	P4		9	5	C	F	P4
3	5	D4	G	P5		9	5	C	G	P6
3	6	D21	A	P6		9	6	D7	A	P5
3	6	D21	B	P3		9	6	D7	B	P1
3	6	D21	C	P7		9	6	D7	C	P3
3	6	D21	D	P4		9	6	D7	D	P2
3	6	D21	E	P5		9	6	D7	E	P7
3	6	D21	F	P1		9	6	D7	F	P6
3	6	D21	G	P2		9	6	D7	G	P4
3	7	D7	A	P1		9	7	D1	A	P5
3	7	D7	B	P7		9	7	D1	B	P6
3	7	D7	C	P5		9	7	D1	C	P4
3	7	D7	D	P4		9	7	D1	D	P1
3	7	D7	E	P3		9	7	D1	E	P7
3	7	D7	F	P2		9	7	D1	F	P3
3	7	D7	G	P6		9	7	D1	G	P2
4	1	D28	A	P5		10	1	D21	A	P2
4	1	D28	B	P4		10	1	D21	B	P7
4	1	D28	C	P7		10	1	D21	C	P4
4	1	D28	D	P6		10	1	D21	D	P1
4	1	D28	E	P1		10	1	D21	E	P5
4	1	D28	F	P2		10	1	D21	F	P3
4	1	D28	G	P3		10	1	D21	G	P6
4	2	D7	A	P6		10	2	D4	A	P6
4	2	D7	B	P3		10	2	D4	B	P2
4	2	D7	C	P5		10	2	D4	C	P7
4	2	D7	D	P1		10	2	D4	D	P3
4	2	D7	E	P7		10	2	D4	E	P5
4	2	D7	F	P2		10	2	D4	F	P1
4	2	D7	G	P4		10	2	D4	G	P4
4	3	C	A	P6		10	3	D7	A	P1
4	3	C	B	P1		10	3	D7	B	P5
4	3	C	C	P5		10	3	D7	C	P4
4	3	C	D	P7		10	3	D7	D	P6
4	3	C	E	P4		10	3	D7	E	P2
4	3	C	F	P2		10	3	D7	F	P3
4	3	C	G	P3		10	3	D7	G	P7
4	4	D1	A	P6		10	4	C	A	P5
4	4	D1	B	P5		10	4	C	B	P4
4	4	D1	C	P7		10	4	C	C	P7
4	4	D1	D	P4		10	4	C	D	P1
4	4	D1	E	P2		10	4	C	E	P3
4	4	D1	F	P3		10	4	C	F	P6
4	4	D1	G	P1		10	4	C	G	P2
4	5	D14	A	P4		10	5	D28	A	P6
4	5	D14	B	P2		10	5	D28	B	P5
4	5	D14	C	P7		10	5	D28	C	P1
4	5	D14	D	P1		10	5	D28	D	P2
4	5	D14	E	P3		10	5	D28	E	P4
4	5	D14	F	P5		10	5	D28	F	P7
4	5	D14	G	P6		10	5	D28	G	P3
4	6	D21	A	P1		10	6	D14	A	P7
4	6	D21	B	P4		10	6	D14	B	P4
4	6	D21	C	P2		10	6	D14	C	P1
4	6	D21	D	P5		10	6	D14	D	P5
4	6	D21	E	P6		10	6	D14	E	P6
4	6	D21	F	P7		10	6	D14	F	P2
4	6	D21	G	P3		10	6	D14	G	P3
4	7	D4	A	P1		10	7	D1	A	P1
4	7	D4	B	P4		10	7	D1	B	P3
4	7	D4	C	P2		10	7	D1	C	P4
4	7	D4	D	P6		10	7	D1	D	P7
4	7	D4	E	P7		10	7	D1	E	P2
4	7	D4	F	P5		10	7	D1	F	P5
4	7	D4	G	P3		10	7	D1	G	P6
5	1	D21	A	P5		11	1	C	A	P5
5	1	D21	B	P6		11	1	C	B	P4
5	1	D21	C	P2		11	1	C	C	P1
5	1	D21	D	P1		11	1	C	D	P7
5	1	D21	E	P7		11	1	C	E	P2
5	1	D21	F	P4		11	1	C	F	P3
5	1	D21	G	P3		11	1	C	G	P6
5	2	D1	A	P6		11	2	D14	A	P1
5	2	D1	B	P4		11	2	D14	B	P5
5	2	D1	C	P7		11	2	D14	C	P3
5	2	D1	D	P1		11	2	D14	D	P4
5	2	D1	E	P3		11	2	D14	E	P2
5	2	D1	F	P2		11	2	D14	F	P6
5	2	D1	G	P5		11	2	D14	G	P7
5	3	D7	A	P7		11	3	D1	A	P3
5	3	D7	B	P1		11	3	D1	B	P4
5	3	D7	C	P2		11	3	D1	C	P1
5	3	D7	D	P3		11	3	D1	D	P2
5	3	D7	E	P5		11	3	D1	E	P7
5	3	D7	F	P6		11	3	D1	F	P6
5	3	D7	G	P4		11	3	D1	G	P5
5	4	C	A	P5		11	4	D4	A	P3
5	4	C	B	P3		11	4	D4	B	P6
5	4	C	C	P7		11	4	D4	C	P7
5	4	C	D	P2		11	4	D4	D	P5
5	4	C	E	P6		11	4	D4	E	P2
5	4	C	F	P1		11	4	D4	F	P4
5	4	C	G	P4		11	4	D4	G	P1
5	5	D4	A	P1		11	5	D21	A	P3
5	5	D4	B	P6		11	5	D21	B	P1
5	5	D4	C	P5		11	5	D21	C	P2
5	5	D4	D	P2		11	5	D21	D	P6
5	5	D4	E	P3		11	5	D21	E	P4
5	5	D4	F	P4		11	5	D21	F	P5
5	5	D4	G	P7		11	5	D21	G	P7
5	6	D28	A	P7		11	6	D28	A	P4
5	6	D28	B	P4		11	6	D28	B	P2
5	6	D28	C	P3		11	6	D28	C	P6
5	6	D28	D	P6		11	6	D28	D	P3
5	6	D28	E	P2		11	6	D28	E	P5
5	6	D28	F	P1		11	6	D28	F	P1
5	6	D28	G	P5		11	6	D28	G	P7
5	7	D14	A	P6		11	7	D7	A	P1
5	7	D14	B	P5		11	7	D7	B	P5
5	7	D14	C	P2		11	7	D7	C	P4
5	7	D14	D	P3		11	7	D7	D	P7
5	7	D14	E	P7		11	7	D7	E	P3
5	7	D14	F	P1		11	7	D7	F	P2
5	7	D14	G	P4		11	7	D7	G	P6
6	1	D21	A	P2		12	1	D7	A	P3
6	1	D21	B	P5		12	1	D7	B	P1
6	1	D21	C	P7		12	1	D7	C	P4
6	1	D21	D	P4		12	1	D7	D	P5
6	1	D21	E	P3		12	1	D7	E	P2
6	1	D21	F	P6		12	1	D7	F	P6
6	1	D21	G	P1		12	1	D7	G	P7
6	2	D14	A	P4		12	2	D4	A	P3
6	2	D14	B	P1		12	2	D4	B	P7
6	2	D14	C	P7		12	2	D4	C	P1
6	2	D14	D	P6		12	2	D4	D	P2
6	2	D14	E	P3		12	2	D4	E	P4
6	2	D14	F	P2		12	2	D4	F	P5
6	2	D14	G	P5		12	2	D4	G	P6
6	3	D4	A	P2		12	3	D14	A	P6
6	3	D4	B	P5		12	3	D14	B	P7
6	3	D4	C	P6		12	3	D14	C	P5
6	3	D4	D	P4		12	3	D14	D	P4
6	3	D4	E	P3		12	3	D14	E	P1
6	3	D4	F	P1		12	3	D14	F	P3
6	3	D4	G	P7		12	3	D14	G	P2
6	4	D1	A	P7		12	4	D21	A	P2
6	4	D1	B	P4		12	4	D21	B	P3
6	4	D1	C	P5		12	4	D21	C	P7
6	4	D1	D	P1		12	4	D21	D	P5
6	4	D1	E	P6		12	4	D21	E	P4
6	4	D1	F	P2		12	4	D21	F	P6
6	4	D1	G	P3		12	4	D21	G	P1
6	5	D28	A	P2		12	5	C	A	P5
6	5	D28	B	P3		12	5	C	B	P1
6	5	D28	C	P6		12	5	C	C	P7
6	5	D28	D	P4		12	5	C	D	P6
6	5	D28	E	P1		12	5	C	E	P3
6	5	D28	F	P5		12	5	C	F	P2
6	5	D28	G	P7		12	5	C	G	P4
6	6	C	A	P6		12	6	D28	A	P4
6	6	C	B	P1		12	6	D28	B	P1
6	6	C	C	P4		12	6	D28	C	P6
6	6	C	D	P3		12	6	D28	D	P7
6	6	C	E	P7		12	6	D28	E	P5
6	6	C	F	P2		12	6	D28	F	P3
6	6	C	G	P5		12	6	D28	G	P2
6	7	D7	A	P6		12	7	D1	A	P4
6	7	D7	B	P2		12	7	D1	B	P2
6	7	D7	C	P4		12	7	D1	C	P1
6	7	D7	D	P3		12	7	D1	D	P5
6	7	D7	E	P1		12	7	D1	E	P7
6	7	D7	F	P5		12	7	D1	F	P3
6	7	D7	G	P7		12	7	D1	G	P6

## Sheet: Timeline
Date	ExperimentDayNo	Treatment	Activities
2020-07-27	0	D0	Collection of cuttings
2020-07-28	1	D1	Plant cuttings, hydrate D1
2020-08-01	4	D4	hydrate D4	4
2020-08-04	7	D7	hydrate D7
2020-08-11	14	D14	hydrate D14
2020-08-18	21	D21	hydrate D21
2020-08-25	28	D28	hydrate D28	7
2020-08-29	32	ALL	hydrate all (except C)	4
2020-09-01	35	ALL	hydrate all (except C)	3
2020-09-05	39	ALL	hydrate all (except C), Aphid outbreak	4
2020-09-08	42	End	Collect cuttings and place them into the drying oven	3

## Sheet: Observations
D4	severe desiccation on the following cuttings: T7, C, P3 (Image 1); T7, D4, P3 (image 3); T3, C, P1 (image 2); T5, D21, P3 (image 4)				Leaf loss D32 (NB: rough estimations only. Cannot account for leaves that landed on the floor, nor could the origins of each leaf be linked with a specific cutting.)
D7	further desiccation of T7, C, P3; T7, D4, P3; T3, C, P1; T5, D21, P3 to a minor degree. No other noticeable changes in the outward appearance of cuttings. Minor yellowing of leaves of various cuttings across all treatments (except D1), across all trays.				Tray #	C	D1	D4	D7	D14	D21	D28
D14	T7, C, P3 (image 1) underwent further desiccation; first noticable desiccation observed in T9, D28, P4 (image 2) and T10, D28, P6 (image 3); individual leaves of T10, D1, P1 (image 4) underwent severe desiccation, whilst the majority of the leaves on this specimen possessed a "healthy, non-desiccated" appearance. No further noticable leaf yellowing.				T1	20	30+	15	20	25	30+	30
D21	Noticable desiccation and "death" of numerous leaves on T12, D14, P5 (image 1); T7, D4, P3 (image 2); T9, D4, P7 (image 4); T8, D28, P7 (image 5); T10, D28, P3 (image 6); T7, C, P3 (image 7). Substantial leaf abscission in T12, D28, P1 (image 3). Abscission and desiccation of larger leaves, as well as the resprouting of smaller leaves on T9, D1, P2 (image 8).				T2	15-20	30+	15-20	35	<10	<10	30+
D28	Desiccated appearance of all individuals in treatment D1 in tray 9 (image 1). Severe desiccation of T3, C, P2 (image 2) and T10, D28, P3 (image 4). Resprouting of leaves in T12, D28, P6 (image 3).				T3	25	20	<10	<10	10	20-25	15-20
D32	Severe desiccation in T5, D21, P3 (image 1), T5, D7, P3 (image 2), T10, D28, P3 (image 3), T9, D28, P2 (image 4). The cutting in the "best physical condition" was T7, D21, P7 (image 5). In general, treatments D1, D4, and to a lesser extent, D7 appeared to be more desiccatted, and experienced greater leaf loss relative to the other treatments, including the control specimens.				T4	30+	15-20	15-20	15-20	10	<10	25
D35	No noticeable changes in the physical appearances of cuttings relative to D32				T5	25	25	25	20	25-30	<10	15
D39	Severe desiccation and leaf loss in T12, D7, P6 (image 1); T12, D21, P3 (image 2); T8, D14, P2 (image 3); T1, D21, P2 (image 4); T9, D4, P7 (image 5); T4, C, P4 (image 6); T10, C, P2, P3, P6 (image 7); T7, D4, P3 (image 8); T7, C, P6, P3 (image 9) and P5 (image 10). Cuttings in good physical condition: T11, D14, P7 (image 11); T3, D4, P2, P3 (image 12); T7, D21, P7 (image 13). APHID OUTBREAK on: …				T6	15	15	10	<10	15	15	30
					T7	<10	25-30	20	<10	15-20	<10	15
					T8	15	20	20	30	30+	<10	20-25
					T9	15	30+	15	15	25-30	<10	<10
					T10	25-30	15	20	15-20	15-20	15	25
					T11	<10	25-30	15	25	15-20	15	25
					T12	20	20	15	10	30+	15	<10

[truncated: 2 more sheets: Form Responses 1, Advice]
